# Supplementary material for: Guanidine hydrochloride (GuHCl)-catalysed microwave-mediated solvent- and metal-free synthesis of pyrimido[1,2-a]benzimidazole from aryl aldehyde and aryl methyl ketone
Source: Royal Society of Chemistry journal article supplement (doi:10.1039/d4gc01363h), 2024-01-01
Supplement: d4gc01363h1.pdf [file d4gc01363h1.pdf]

# Electronic Supplementary Material

## Guanidine Hydrochloride (GuHCl) Catalysed Microwave-Mediated Solvent- and Metal-Free Synthesis of Pyrimido[1,2-a]benzimidazole from Aryl Aldehyde and Aryl Methyl Ketone

Rushikant Jagdale,<sup>a+</sup> Mohammad Zahid Hussain,<sup>a+</sup> Koushik Goswami,<sup>b</sup> Ramalingam Peraman,<sup>a</sup> Anupam Jana<sup>a\*</sup>

<sup>a</sup>Department of Pharmaceutical Analysis  
National Institute of Pharmaceutical Education and Research, Hajipur  
Hajipur, Bihar – 844102, India

<sup>b</sup>Department of Chemistry, Amity University Kolkata  
Rajarhat, New Town, Kolkata 700135, India

Email: [anupamjana2@gmail.com](mailto:anupamjana2@gmail.com)

+These authors contributed equally to this work.

---

| <b>Contents</b>                                                         | <b>Page No.</b> |
|-------------------------------------------------------------------------|-----------------|
| Experimental Section                                                    | <b>3</b>        |
| Green matrix Calculation                                                | <b>16</b>       |
| <sup>1</sup> H and <sup>13</sup> C NMR Spectra of compounds <b>4a-x</b> | <b>36</b>       |
| Fluorescence Spectra                                                    | <b>83</b>       |
| Precautions taken for high temperature reaction in DMSO                 | <b>86</b>       |
| Differential Scanning Calorimetry (DSC)                                 | <b>87</b>       |

---

## Experimental Section

### General information

All chemicals and solvents were purchased from commercial suppliers and used without further purification. All reactions were carried out in oven-dried glassware with magnetic stirring. Commercially available chemicals were used without further purification. The starting materials acetophenone **1**, benzaldehyde **2**, 2-benzimidazole **3** and GuHCl were purchased from commercial source. Monitoring of the reaction was performed by thin-layer chromatography using TLC silica gel 60 F254 plates. Flash column chromatography was performed using silica gel 243-400 mesh typically using a n-hexane/ethyl acetate eluent system. NMR spectra were calibrated to the solvent residual signals of DMSO. <sup>1</sup>H NMR spectra were recorded at 400 MHz Jeol, 500 & 600 MHz Bruker instruments. Data are reported as follows: chemical shift, multiplicity (s: singlet, d: doublet, t: triplet, q: quartet, qui: quintuplet, m: multiplet), coupling constant (*J* in Hz) and integration. <sup>13</sup>C NMR spectra were recorded at 101, 126 and 151 MHz using broadband proton decoupling and chemical shifts are reported in ppm using residual solvent peaks as reference. High resolution mass spectra (HRMS) were recorded on a Orbitrap (Exploris 240) mass spectrometer with an orthogonal Z-spray–electrospray interface. Reported yields are based upon isolation following purification by silica gel column chromatography; isolated material was judged to be homogeneous based upon TLC and NMR. Pyrimido[1,2-*a*]benzimidazole **4a**<sup>1</sup>, **4b**<sup>1b</sup>, **4c**<sup>1</sup>, **4d**<sup>1d</sup>, **4g**<sup>1d</sup> and **4p**<sup>1</sup>.

**General procedure of pyrimido[1,2-*a*]benzimidazole synthesis:** Aryl methyl ketone **1** (2.0 mmol), benzaldehyde **2** (2.0 mmol), 2-aminobenzimidazole **3** (2.0 mmol) were taken in vial and entire mixture was irradiated in microwave at 720W for 2X5 min. Then, the reaction mass was purified by column chromatography (ethyl acetate/n-hexane) to afford the pure product.

**General procedure for chromatography-free Synthesis of 2,4-diaryl pyrimido [1,2-*a*]benzimidazoles:** Aryl methyl ketone **1** (2.0 mmol), aryl aldehyde **2** (2.0 mmol), and 2-aminobenzimidazole **3** (2.0 mmol) were irradiated under microwave at 720W for 2X5 min. Then, the reaction mixture was dissolved in 2.0 mL of DMSO, followed by precipitation of the product through the addition of water (2.0 mL). The solid was filtered and washed with water (10 mL) to remove DMSO and guanidine hydrochloride. After air-drying for a few hours, the solid was further washed with a 20% ethyl acetate-hexane (10 mL) to eliminate low-polarity impurities. Finally, the product was purified by precipitation or crystallization from ethyl acetate/hexane.

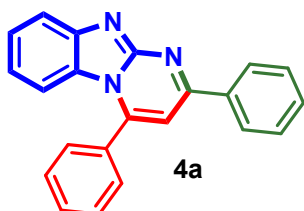

*2,4-diphenylbenzo[4,5]imidazo[1,2-a]pyrimidine (4a)*: Yellow amorphous solid (494 mg, 77%);  $R_f = 0.82$  (petroleum ether/EtOAc 1:1);  $\delta_H$  (400 MHz, Chloroform-*d*)  $\delta$  8.36 – 8.26 (m, 2H), 7.97 (d,  $J = 8.2$  Hz, 1H), 7.76 – 7.61 (m, 5H), 7.59-7.51 (m, 3H), 7.46 (t,  $J = 7.7$  Hz, 1H), 7.27 (s, 1H), 7.03 (t,  $J = 7.8$  Hz, 1H), 6.69 (d,  $J = 8.5$  Hz, 1H);  $\delta_C$  (151 MHz, CDCl<sub>3</sub>) 161.3, 152.3, 149.5, 145.7, 136.9, 132.8, 131.4, 131.2, 129.6, 129.1, 128.5, 128.0, 127.6, 126.1, 121.3, 120.4, 114.7, 105.5.

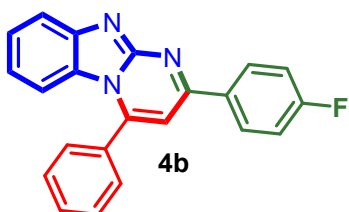

*2-(4-fluorophenyl)-4-phenylbenzo[4,5]imidazo[1,2-a]pyrimidine (4b)*: Yellow crystalline solid (576 mg, 85%);  $R_f = 0.72$  (petroleum ether/EtOAc 1:1);  $\delta_H$  (400 MHz, Chloroform-*d*)  $\delta$  8.38 – 8.30 (m, 2H), 7.98 (d,  $J = 8.2$  Hz, 1H), 7.80 – 7.62 (m, 5H), 7.46 (ddd,  $J = 8.3, 7.2, 1.1$  Hz, 1H), 7.26 – 7.15 (m, 3H), 7.04 (ddd,  $J = 8.4, 7.2, 1.2$  Hz, 1H), 6.71 – 6.64 (m, 1H);  $\delta_C$  (126 MHz, CHLOROFORM-*D*) 165.0 (d,  $J$  250 Hz), 160.0, 152.1, 149.6, 145.6, 133.0 (d,  $J$  3 Hz), 132.6, 131.3, 130.0 (d,  $J$  9 Hz), 129.6, 128.5, 127.5, 126.1, 121.4, 120.3, 116.1 (d,  $J$  22 Hz), 114.6, 105.1; **ESI-MS**:  $m/z = [M+H]^+$  calcd. for C<sub>22</sub>H<sub>15</sub>FN<sub>3</sub>: 340.1245; found 340.1241.

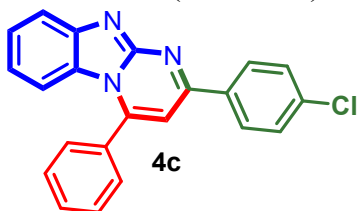

*2-(4-chlorophenyl)-4-phenylbenzo[4,5]imidazo[1,2-a]pyrimidine (4c)*: Yellow amorphous solid (576 mg, 81%);  $R_f = 0.61$  (petroleum ether/EtOAc 1:1);  $\delta_H$  (400 MHz, Chloroform-*d*)  $\delta$  8.29 – 8.21 (m, 2H), 7.97 (d,  $J = 8.3$  Hz, 1H), 7.78 – 7.59 (m, 5H), 7.53 – 7.43 (m, 3H), 7.23 (s, 1H), 7.04 (ddd,  $J = 8.4, 7.2, 1.2$  Hz, 1H), 6.68 (d,  $J = 8.4$  Hz, 1H);  $\delta_C$  (126 MHz, CHLOROFORM-*D*) 159.9, 152.1, 149.7, 145.6, 137.8, 135.2, 132.6, 131.3, 129.6, 129.3, 129.2, 128.5, 127.5, 126.2, 121.5, 120.4, 114.7, 105.1; **ESI-MS**:  $m/z = [M+H]^+$  calcd. for C<sub>22</sub>H<sub>15</sub>ClN<sub>3</sub>: 356.0949; found 356.0945.

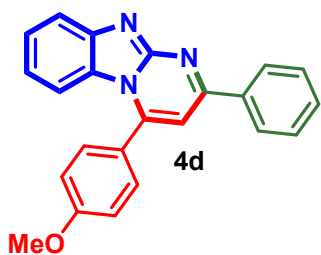

4-(4-methoxyphenyl)-2-phenylbenzo[4,5]imidazo[1,2-a]pyrimidine (**4d**): Yellow amorphous solid (499 mg, 71%);  $R_f = 0.42$  (petroleum ether/EtOAc 1:1);  $\delta_H$  (400 MHz, Chloroform-*d*)  $\delta$  8.37 – 8.21 (m, 2H), 7.96 (ddd,  $J = 8.2, 0.8$  Hz, 1H), 7.62 – 7.56 (m, 2H), 7.53 (ddd,  $J = 4.6, 2.6, 1.4$  Hz, 3H), 7.46 (ddd,  $J = 8.3, 7.2, 1.1$  Hz, 1H), 7.23 (s, 1H), 7.20 – 7.13 (m, 2H), 7.06 (ddd,  $J = 8.4, 7.2, 1.2$  Hz, 1H), 6.84 (dt,  $J = 8.5, 1.0$  Hz, 1H), 3.98 (s, 3H);  $\delta_C$  (101 MHz, CHLOROFORM-*D*) 161.8, 161.2, 152.5, 149.6, 145.7, 136.9, 131.4, 130.0, 129.1, 128.0, 127.7, 126.0, 124.9, 121.1, 120.3, 114.8, 114.8, 105.6, 55.7, 29.8.

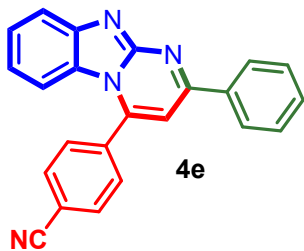

4-(2-phenylbenzo[4,5]imidazo[1,2-a]pyrimidin-4-yl)benzonitrile (**4e**): Yellow amorphous solid (581 mg, 84%);  $R_f = 0.80$  (petroleum ether/EtOAc 1:1);  $\delta_H$  (400 MHz, Chloroform-*d*)  $\delta$  8.33 – 8.28 (m, 2H), 8.02 – 7.99 (m, 3H), 7.86 – 7.81 (m, 2H), 7.60-7.53 (m, 4H), 7.53 – 7.47 (m, 1H), 7.13-7.05 (m, 1H), 6.67 – 6.59 (m, 1H);  $\delta_C$  (126 MHz, CHLOROFORM-*D*) 161.1, 151.9, 147.0, 145.6, 136.8, 136.3, 133.3, 131.7, 129.6, 129.2, 127.9, 127.1, 126.4, 121.9, 120.8, 117.9, 115.3, 114.0, 105.6; **ESI-MS**:  $m/z = [M+H]^+$  calcd. for  $C_{23}H_{15}N_4$ : 347.1291; found 347.1298.

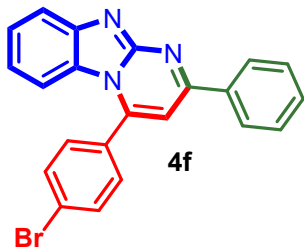

4-(4-bromophenyl)-2-phenylbenzo[4,5]imidazo[1,2-a]pyrimidine (**4f**): Yellow amorphous solid (672 mg, 83%);  $R_f = 0.53$  (petroleum ether/EtOAc 1:1);  $\delta_H$   $^1H$  NMR (400 MHz, Chloroform-*d*)  $\delta$  8.33 – 8.24 (m, 2H), 7.98 (dt,  $J = 8.3, 1.0$  Hz, 1H), 7.87 – 7.79 (m, 2H),

7.58 – 7.51 (m, 5H), 7.48 (ddd,  $J = 8.3, 7.2, 1.1$  Hz, 1H), 7.24 (s, 1H), 7.09 (ddd,  $J = 8.4, 7.2, 1.2$  Hz, 1H), 6.77 (dt,  $J = 8.5, 1.0$  Hz, 1H);  $\delta_C$  (126 MHz, CHLOROFORM-*D*) 161.2, 152.1, 148.2, 145.6, 136.6, 132.9, 131.6, 131.5, 130.2, 129.1, 127.9, 127.4, 126.2, 125.8, 121.6, 120.5, 114.5, 105.5; **ESI-MS**:  $m/z = [M+H]^+$  calcd. for  $C_{22}H_{15}BrN_3$ : 400.0444; found 400.0440.

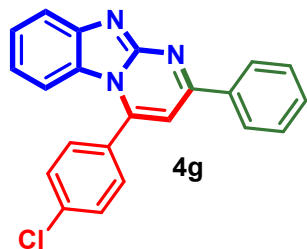

**4-(4-chlorophenyl)-2-phenylbenzo[4,5]imidazo[1,2-a]pyrimidine (4g)**: Yellow amorphous solid (626 mg, 88%);  $R_f = 0.79$  (petroleum ether/EtOAc 5/5);  $\delta_H$  (400 MHz, Chloroform-*d*)  $\delta$  8.37 – 8.23 (m, 2H), 7.99 (d,  $J = 8.1$  Hz, 1H), 7.71 – 7.64 (m, 2H), 7.65 – 7.59 (m, 2H), 7.56 – 7.51 (m, 3H), 7.48 (ddd,  $J = 8.3, 7.2, 1.1$  Hz, 1H), 7.26 (s, 3H), 7.09 (ddd,  $J = 8.4, 7.2, 1.2$  Hz, 1H), 6.76 (d,  $J = 8.5$  Hz, 1H);  $\delta_C$  (151 MHz,  $CDCl_3$ ) 161.2, 152.2, 148.2, 145.7, 137.6, 136.7, 131.6, 131.1, 130.0, 130.0, 129.1, 128.0, 127.4, 126.2, 121.6, 120.6, 114.4, 105.6; **ESI-MS**:  $m/z = [M+H]^+$  calcd. for  $C_{22}H_{15}ClN_3$ : 356.0949; found 356.0946.

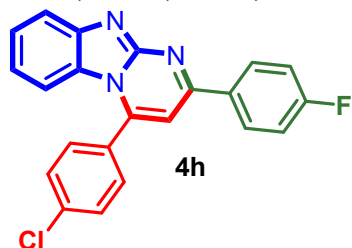

**4-(4-chlorophenyl)-2-(4-fluorophenyl)benzo[4,5]imidazo[1,2-a]pyrimidine (4h)**: Yellow amorphous solid (628 mg, 84%);  $R_f = 0.76$  (petroleum ether/EtOAc 1:1);  $\delta_H$  (400 MHz, Chloroform-*d*)  $\delta$  8.34 – 8.25 (m, 2H), 7.96 (dt,  $J = 8.3, 1.0$  Hz, 1H), 7.70 – 7.64 (m, 2H), 7.63 – 7.58 (m, 2H), 7.47 (ddd,  $J = 8.3, 7.2, 1.1$  Hz, 1H), 7.24 – 7.16 (m, 3H), 7.08 (ddd,  $J = 8.4, 7.2, 1.2$  Hz, 1H), 6.74 (dt,  $J = 8.5, 0.9$  Hz, 1H);  $\delta_C$  (126 MHz, CHLOROFORM-*D*) 165.1 (d,  $J$  251 Hz), 160.0, 152.0, 148.4, 145.6, 137.6, 132.8 (d,  $J$  3 Hz), 130.9, 130.1, 130.1 (d,  $J$  9 Hz), 129.9, 127.4, 126.3, 121.6, 120.6, 116.2 (d,  $J$  21 Hz), 114.4, 105.2; **ESI-MS**:  $m/z = [M+H]^+$  calcd. for  $C_{22}H_{14}ClFN_3$ : 374.0855; found 374.0851.

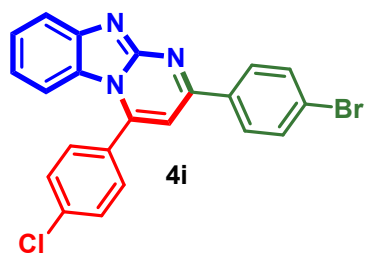

2-(4-bromophenyl)-4-(4-chlorophenyl)benzo[4,5]imidazo[1,2-a]pyrimidine (**4i**): Yellow crystalline solid (757 mg, 84%);  $R_f = 0.78$  (petroleum ether/EtOAc 1:1);  $\delta_H$  (500 MHz, Chloroform-*d*)  $\delta$  8.14 (d,  $J = 8.6$  Hz, 2H), 7.96 (d,  $J = 8.2$  Hz, 1H), 7.75 – 7.57 (m, 6H), 7.51 – 7.42 (m, 1H), 7.17 (s, 1H), 7.12 – 7.03 (m, 1H), 6.74 (d,  $J = 8.4$  Hz, 1H);  $\delta_C$  (126 MHz, CHLOROFORM-*D*) 159.9, 151.9, 148.5, 145.6, 137.7, 135.4, 132.3, 130.8, 130.0, 129.9, 129.3, 127.3, 126.4, 126.4, 121.7, 120.6, 114.5, 105.1; **ESI-MS**:  $m/z = [M+H]^+$  calcd. for  $C_{22}H_{14}BrClN_3$ : 434.0054; found 434.0051.

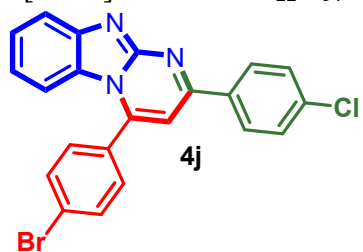

4-(4-bromophenyl)-2-(4-chlorophenyl)benzo[4,5]imidazo[1,2-a]pyrimidine (**4j**): Yellow crystalline solid (696 mg, 84%);  $R_f = 0.80$  (petroleum ether/EtOAc 1:1);  $\delta_H$  (400 MHz, Chloroform-*d*)  $\delta$  8.29 – 8.19 (m, 2H), 8.02 – 7.93 (m, 1H), 7.87 – 7.78 (m, 2H), 7.57 – 7.52 (m, 2H), 7.52 – 7.45 (m, 3H), 7.18 (s, 1H), 7.14 – 7.05 (m, 1H), 6.80 – 6.71 (m, 1H);  $\delta_C$  (126 MHz, CHLOROFORM-*D*) 159.8, 151.9, 148.5, 145.7, 137.9, 135.0, 132.9, 131.3, 130.1, 129.4, 129.2, 127.4, 126.4, 125.9, 121.7, 120.6, 114.5, 105.1; **ESI-MS**:  $m/z = [M+H]^+$  calcd. for  $C_{22}H_{14}BrClN_3$ : 434.0054; found 434.0049.

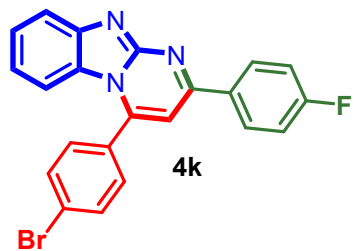

4-(4-bromophenyl)-2-(4-fluorophenyl)benzo[4,5]imidazo[1,2-a]pyrimidine (**4k**): Yellow crystalline solid (652 mg, 78%);  $R_f = 0.81$  (petroleum ether/EtOAc 1:1);  $\delta_H$  (400 MHz, Chloroform-*d*)  $\delta$  8.37 – 8.28 (m, 2H), 8.03 – 7.94 (m, 1H), 7.89 – 7.77 (m, 2H), 7.57 – 7.52 (m, 2H), 7.49 (ddd,  $J = 8.3, 7.2, 1.1$  Hz, 1H), 7.25 – 7.20 (m, 2H), 7.19 (s, 1H), 7.10 (ddd,  $J = 8.4, 7.2, 1.2$  Hz, 1H), 6.77 (dt,  $J = 8.5, 1.0$  Hz, 1H);  $\delta_C$  (126 MHz, CHLOROFORM-*D*) 165.1 (d,  $J$  250 Hz) 160.0, 152.0, 148.4, 145.6, 132.9, 131.4, 130.1, 130.1, 130.1, 127.4, 126.3, 125.9, 121.6, 120.6, 116.3 (d, 90 Hz), 114.4, 105.2; **ESI-MS**:  $m/z = [M+H]^+$  calcd. for  $C_{22}H_{14}BrFN_3$ : 418.0350; found 418.0346.

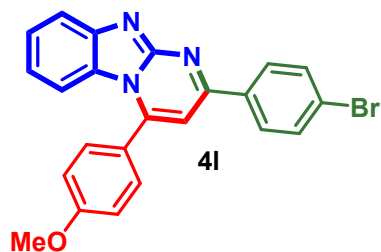

2-(4-bromophenyl)-4-(4-methoxyphenyl)benzo[4,5]imidazo[1,2-a]pyrimidine (**4l**): Yellow crystalline solid (611 mg, 71%);  $R_f = 0.68$  (petroleum ether/EtOAc 1:1);  $\delta_H$  (600 MHz, Chloroform-*d*)  $\delta$  8.15 (d,  $J = 8.5$  Hz, 2H), 7.96 (d,  $J = 8.2$  Hz, 1H), 7.66 (d,  $J = 8.5$  Hz, 2H), 7.58 (d,  $J = 8.6$  Hz, 2H), 7.48 (t,  $J = 7.6$  Hz, 1H), 7.22 – 7.13 (m, 3H), 7.08 (t,  $J = 7.8$  Hz, 1H), 6.86 (d,  $J = 8.4$  Hz, 1H), 3.98 (s, 3H);  $\delta_C$  (151 MHz,  $CDCl_3$ ) 161.9, 160.1, 152.2, 150.0, 145.5, 135.7, 132.4, 130.0, 129.4, 127.6, 126.3, 124.7, 121.4, 120.7, 120.3, 114.9, 114.9, 105.3, 55.7; **ESI-MS**:  $m/z = [M+H]^+$  calcd. for  $C_{23}H_{17}BrN_3O$ : 430.0550, found 430.0545.

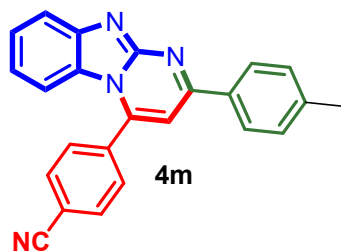

4-(2-(*p*-tolyl)benzo[4,5]imidazo[1,2-a]pyrimidin-4-yl)benzonitrile (**4m**): Orange amorphous solid (641 mg, 89%);  $R_f = 0.79$  (petroleum ether/EtOAc 1:1);  $\delta_H$  (600 MHz, Chloroform-*d*)  $\delta$  8.16 (d,  $J = 7.4$  Hz, 2H), 8.05-7.85 (m, 3H), 7.85-7.75 (m, 2H), 7.46 (t,  $J = 7.1$  Hz, 1H), 7.32 (d,  $J = 7.7$  Hz, 2H), 7.20 (s, 1H), 7.06 (t,  $J = 7.7$  Hz, 1H), 6.66 – 6.56 (m, 1H), 2.43 (s, 3H);  $\delta_C$  (151 MHz,  $CDCl_3$ ) 161.1, 152.0, 146.9, 145.6, 142.4, 136.9, 133.6, 133.3, 129.9, 129.6, 127.9, 127.2, 126.3, 121.7, 120.7, 117.9, 115.3, 114.0, 105.5, 21.7; **ESI-MS**:  $m/z = [M+H]^+$  calcd. for  $C_{24}H_{17}N_4$ : 361.1448; found .; found 361.1454.



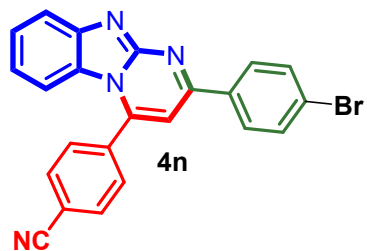

**4-(2-(4-bromophenyl)benzo[4,5]imidazo[1,2-a]pyrimidin-4-yl)benzonitrile (4n):** Orange amorphous solid (706 mg, 83%);  $R_f = 0.52$  (petroleum ether/EtOAc 1:1);  $\delta_H$  (600 MHz, Chloroform-*d*)  $\delta$  8.12 (d,  $J = 8.6$  Hz, 2H), 8.00 (d,  $J = 8.2$  Hz, 2H), 7.95 (d,  $J = 8.2$  Hz, 1H), 7.84 (d,  $J = 8.2$  Hz, 2H), 7.64 (d,  $J = 8.5$  Hz, 2H), 7.47 (t,  $J = 7.6$  Hz, 1H), 7.17 (s, 1H), 7.07 (t,  $J = 7.8$  Hz, 1H), 6.60 (d,  $J = 8.4$  Hz, 1H);  $\delta_C$  (101 MHz, DMSO- $D_6$ ) (151 MHz,  $CDCl_3$ ) 159.8, 151.6, 147.3, 145.7, 136.7, 135.2, 133.4, 132.4, 129.6, 129.3, 127.1, 126.7, 126.6, 122.1, 120.9, 117.8, 115.5, 114.0, 105.1; **ESI-MS:**  $m/z = [M+H]^+$  calcd. for  $C_{23}H_{13}BrN_4$ : 425.0396; found .; found 425.0391.

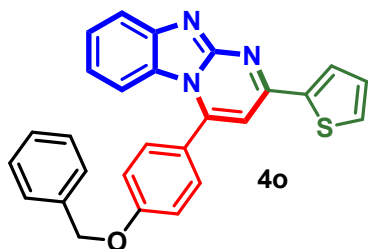

**4-(4-(benzyloxy)phenyl)-2-(thiophen-2-yl)benzo[4,5]imidazo[1,2-a]pyrimidine (4o):** Yellow amorphous solid (703 mg, 81%);  $R_f = 0.51$  (petroleum ether/EtOAc 1:1);  $\delta_H$  (600 MHz, Chloroform-*d*)  $\delta$  7.92 (d,  $J = 8.1$  Hz, 1H), 7.83 (d,  $J = 3.5$  Hz, 1H), 7.60-7.54 (m, 3H), 7.54-7.48 (m, 2H), 7.47 – 7.38 (m, 4H), 7.23 (d,  $J = 8.6$  Hz, 2H), 7.19 – 7.14 (m, 1H), 7.06 (s, 1H), 7.03 (t,  $J = 7.7$  Hz, 1H), 6.78 (d,  $J = 8.4$  Hz, 1H), 5.23 (s, 2H);  $\delta_C$  (151 MHz,  $CDCl_3$ ) 161.0, 156.3, 152.1, 149.3, 145.6, 143.1, 136.3, 131.7, 130.1, 128.9, 128.8, 128.5, 127.9, 127.7, 125.9, 124.9, 121.2, 120.2, 115.8, 114.6, 104.9, 70.5; **ESI-MS:**  $m/z = [M+H]^+$  calcd. for  $C_{27}H_{20}N_3OS$  : 434.1322; found .; 434.1329.

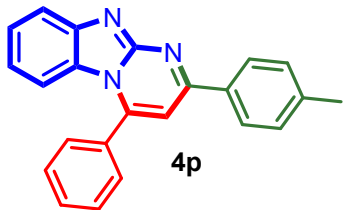

*4-phenyl-2-(p-tolyl)benzo[4,5]imidazo[1,2-a]pyrimidine (4p)*: Yellow amorphous solid (462 mg, 69%);  $R_f = 0.90$  (petroleum ether/EtOAc 1:1);  $\delta_H$  (600 MHz, Chloroform-*d*)  $\delta$  8.20 (d,  $J = 8.1$  Hz, 2H), 7.94 (d,  $J = 8.2$  Hz, 1H), 7.81 – 7.55 (m, 5H), 7.44 (t,  $J = 7.6$  Hz, 1H), 7.32 (d,  $J = 8.0$  Hz, 2H), 7.23 (s, 1H), 7.01 (t,  $J = 7.7$  Hz, 1H), 6.66 (d,  $J = 8.4$  Hz, 1H), 2.43 (s, 3H);  $\delta_C$  (151 MHz, CDCl<sub>3</sub>) 161.3, 152.4, 149.3, 145.6, 142.0, 134.0, 132.8, 131.1, 129.8, 129.5, 128.5, 127.9, 127.6, 126.0, 121.2, 120.2, 114.6, 105.3, 21.6.

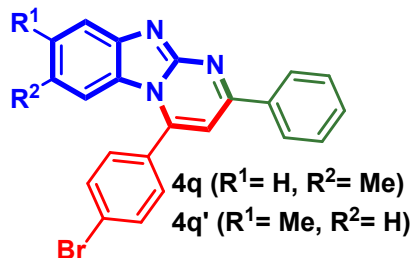

Compound **4q** and **4q'**: Yellow amorphous solid (653 mg, 79%);  $R_f = 0.83$  (petroleum ether/EtOAc 1:1);  $^1H$  NMR (600 MHz, Chloroform-*d*)  $\delta$  8.27-8.23 (m, 2H), 7.90 – 7.74 (m, 3H), 7.58 – 7.48 (m, 5H), 7.33 – 7.27 (m) and 6.97 – 6.84 (m) (1H), 7.18 (d,  $J = 7.7$  Hz, 1H), 6.63 (m) and 6.54 (s) (1H), 2.50 (s) and 2.33 (s) (3H);  $\delta_C$  (151 MHz, CDCl<sub>3</sub>) 160.6, 160.4, 152.1, 151.8, 147.8, 147.8, 145.9, 143.6, 136.6, 136.3, 132.7, 132.6, 131.5, 131.5, 131.4, 131.3, 130.1, 130.0, 128.9, 127.8, 127.7, 127.3, 125.6, 125.5, 123.1, 120.0, 114.0, 113.8, 105.3, 105.1, 22.1, 21.9; **ESI-MS**:  $m/z = [M+H]^+$  calcd. for C<sub>23</sub>H<sub>17</sub>BrN<sub>3</sub>: 414.0600; found 414.0609.

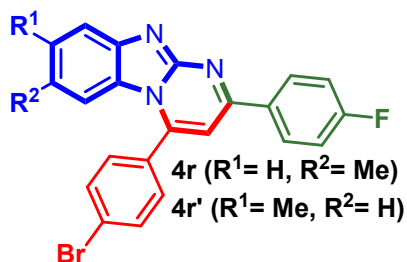

Compound **4r** and **4r'**: Yellow amorphous solid (672 mg, 78%);  $R_f = 0.80$  (petroleum ether/EtOAc 1:1);  $\delta_H$  (600 MHz, Chloroform-*d*) 8.27- 8.25 (2 H, m), 7.88 – 7.77 (3 H, m), 7.55 (2 H, dd,  $J$  8.0, 6.0), 7.29 (d,  $J$  8.3) and 6.89 (d,  $J$  8.5) (1H), 7.19 (2 H, t,  $J$  8.3), 7.12 (1 H, d,  $J$  8.1), 6.65- 6.50 (1H, m), 2.49 (s) and 2.32 (1 H) (3H);  $\delta_C$  (151 MHz, CDCl<sub>3</sub>) 164.3 (d,  $J$  250 Hz), 159.2 (d,  $J$  27 Hz), 151.8 (d,  $J$  52 Hz), 148.0, 147.9 (d,  $J$  9 Hz), 143.6, 136.4, 132.7, 132.6, 131.5, 131.4, 131.4, 130.0, 130.0, 129.9, 129.8, 127.9, 127.3,

125.6, 125.6, 125.2, 123.2, 119.9, 116.1, 115.9, 114.0, 113.8, 104.9, 104.7, 22.1, 21.8; **ESI-MS**:  $m/z$  = $[M+H]^+$ calcd. for  $C_{23}H_{16}BrFN_3$ : 432.0506; found 432.0508.

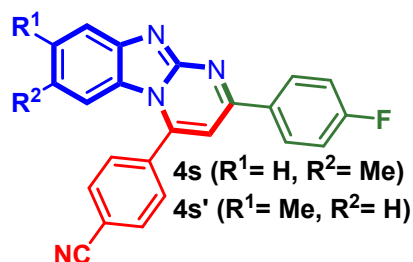

Compound **4s** and **4s'**: Yellow amorphous solid (529 mg, 71%);  $R_f$  = 0.75 (petroleum ether/EtOAc 1:1);  $\delta_H$  (600 MHz, Chloroform-*d*) 8.38-8.8.10 (2 H, m), 7.99 – 7.52 (5 H, m), 7.30 (d,  $J$  8.0) and 6.90 (d,  $J$  8.2) (1H), 7.24 – 7.08 (3 H, m), 6.69 – 6.40 (1 H, m), 2.50 (s) and 2.33 (s) (3H);  $\delta_C$  (151 MHz,  $CDCl_3$ ) 165.0 (d,  $J$  252 Hz), 159.5(d,  $J$  27 Hz), 152.1, 148.1 (d,  $J$  10 Hz), 146.0, 143.7, 137.6, 136.6, 132.9, 131.7, 131.0, 130.0, 129.9, 129.8, 128.1, 125.4, 123.4, 120.1, 116.3, 116.1, 114.1, 114.0, 105.2, 105.0, 22.2, 22.0; **ESI-MS**:  $m/z$  = $[M+H]^+$ calcd. for  $C_{24}H_{16}FN_4$ : 379.1354; found 379.1348.

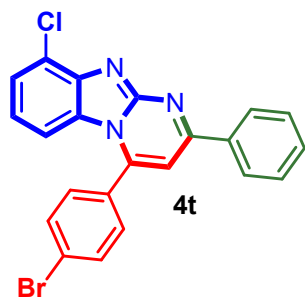

4-(4-bromophenyl)-9-chloro-2-phenylbenzo[4,5]imidazo[1,2-*a*]pyrimidine (**4t**): Yellow amorphous solid (710 mg, 82%);  $R_f$  = 0.85 (petroleum ether/EtOAc 1:1);  $\delta_H$  (600 MHz, Chloroform-*d*) 8.28 (2 H, dd,  $J$  7.8, 1.5), 7.84 (2 H, d,  $J$  8.3), 7.57 (2 H, d,  $J$  8.3), 7.55 – 7.49 (3 H, m), 7.46 (1 H, d,  $J$  7.6), 7.26 (1 H, s), 6.97 (1 H, t,  $J$  8.1), 6.64 (1 H, d,  $J$  8.3);  $\delta_C$  (151 MHz,  $CDCl_3$ ) 161.7, 152.1, 148.4, 142.9, 136.2, 133.0, 131.8, 131.1, 130.2, 129.1, 128.2, 128.0, 126.0, 125.9, 125.1, 121.7, 113.0, 106.1; **ESI-MS**:  $m/z$  = $[M+H]^+$ calcd. for  $C_{22}H_{14}BrClN_3$ : 434.0054; found 434.0064.

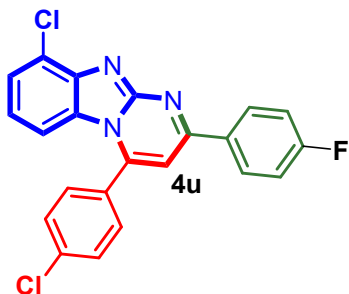

9-chloro-4-(4-chlorophenyl)-2-(4-fluorophenyl)benzo[4,5]imidazo[1,2-a]pyrimidine (**4u**): Yellow amorphous solid (529 mg, 76%);  $R_f = 0.75$  (petroleum ether/EtOAc 1:1);  $\delta_H$  (600 MHz, Chloroform-*d*) 8.32 (2 H, dd,  $J$  8.7, 5.4), 7.71-7.65 (2 H, m), 7.63-7.57 (2 H, m), 7.50 (1 H, d,  $J$  7.7), 7.24 – 7.18 (3 H, m), 7.00 (1 H, t,  $J$  8.1), 6.65 (1 H, d,  $J$  8.4);  $\delta_C$  (151 MHz, CDCl<sub>3</sub>) 165.7 (d,  $J$  210 Hz), 160.5, 148.4, 142.8, 137.8, 132.4, 130.4, 130.1, 130.1, 129.9 (d,  $J$  5 Hz), 128.1, 125.9, 125.1, 121.7, 116.3, 116.1, 112.8, 105.7; **ESI-MS**:  $m/z = [M+H]^+$  calcd. for C<sub>22</sub>H<sub>13</sub>Cl<sub>2</sub>FN<sub>3</sub>: 408.0465; found 408.0468.

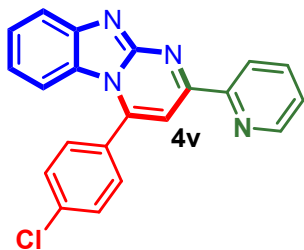

4-(4-chlorophenyl)-2-(pyridin-2-yl)benzo[4,5]imidazo[1,2-a]pyrimidine (**4v**): Yellow crystalline solid (434 mg, 61%);  $R_f = 0.25$  (MeOH/DCM 1:4)  $\delta_H$  (600 MHz, DMSO-*d*<sub>6</sub>) 9.55 (1 H, d,  $J$  2.0), 8.77 (2 H, dd,  $J$  13.6, 6.4), 7.88 (1 H, d,  $J$  8.2), 7.85 – 7.81 (3 H, m), 7.79 (1 H, t,  $J$  7.5), 7.74 (2 H, t,  $J$  7.3), 7.64 (1 H, dd,  $J$  7.9, 4.9), 7.48 (1 H, t,  $J$  7.7), 7.09 (1 H, t,  $J$  7.8), 6.57 (1 H, d,  $J$  8.3). \* Due to its highly insoluble nature, we were unable to record the <sup>13</sup>C NMR spectrum; **ESI-MS**:  $m/z = [M+H]^+$  calcd. for C<sub>21</sub>H<sub>14</sub>ClN<sub>4</sub>: 357.0902; found 357.0895.

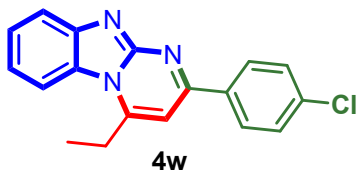

**2-(4-chlorophenyl)-4-ethylbenzo[4,5]imidazo[1,2-a]pyrimidine (4w):** Yellow amorphous solid (375 mg, 61%);  $R_f = 0.80$  (petroleum ether/EtOAc 1:1);  $^1\text{H NMR}$  (600 MHz, Chloroform- $d$ )  $\delta$  8.43 (s, 1H), 8.19 (d,  $J = 7.8$  Hz, 1H), 8.02 (d,  $J = 8.2$  Hz, 1H), 7.99 (d,  $J = 8.4$  Hz, 1H), 7.63 (d,  $J = 7.9$  Hz, 1H), 7.57 (t,  $J = 7.7$  Hz, 1H), 7.44 – 7.33 (m, 2H), 7.14 (s, 1H), 3.45 (q,  $J = 7.4$  Hz, 2H), 1.62 (t,  $J = 7.4$  Hz, 3H);  $\delta_c$  (151 MHz,  $\text{CDCl}_3$ ) 159.4, 153.7, 151.8, 145.5, 138.8, 133.9, 130.8, 130.4, 127.5, 126.3, 126.0, 123.2, 121.9, 120.5, 114.9, 101.7, 29.7, 10.8; **ESI-MS:**  $m/z = [\text{M}+\text{H}]^+$  calcd. for  $\text{C}_{18}\text{H}_{15}\text{ClN}_3$ : 308.0949; found 308.0941.

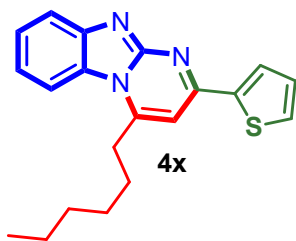

**4-hexyl-2-(thiophen-2-yl)benzo[4,5]imidazo[1,2-a]pyrimidine (4x):** Yellow amorphous solid (430 mg, 64%);  $R_f = 0.85$  (petroleum ether/EtOAc 1:1);  $^1\text{H NMR}$  (600 MHz, Chloroform- $d$ )  $\delta$  7.98 (d,  $J = 8.2$  Hz, 1H), 7.89 (d,  $J = 8.4$  Hz, 1H), 7.85 (dd,  $J = 3.7, 0.9$  Hz, 1H), 7.58 (dd,  $J = 5.0, 0.9$  Hz, 1H), 7.54 (t,  $J = 7.7$  Hz, 1H), 7.40 – 7.34 (m, 1H), 7.18 (dd,  $J = 4.9, 3.8$  Hz, 1H), 7.03 (s, 1H), 3.57 – 3.02 (m, 2H), 1.96 (t,  $J = 7.7$  Hz, 2H), 1.67 – 1.60 (m, 2H), 1.48 – 1.36 (m, 4H), 0.94 (t,  $J = 7.1$  Hz, 3H);  $\delta_c$  (151 MHz,  $\text{CDCl}_3$ ) 156.1, 151.9, 145.6, 143.1, 131.4, 128.5, 128.3, 127.8, 125.7, 121.6, 120.4, 114.5, 102.3, 77.2, 77.0, 76.8, 33.3, 31.5, 29.0, 26.2, 22.5, 14.0; **ESI-MS:**  $m/z = [\text{M}+\text{H}]^+$  calcd. for  $\text{C}_{20}\text{H}_{22}\text{N}_3\text{S}$ : 336.1529; found 336.1525.

## References:

1. a) A. Kumar, M. Kumar, S. Maurya, and R. S. Khanna. *J. Org. Chem.* 2014, **79**, 6905-6912. (b) V. V. Shinde and Y. T. Jeong, *New J. Chem.* 2015, **39**, 4977-4986. (c) M. Rawat and D. S. Rawat, *Tet. Lett.* 2018, **59**, 2341-2346. (d) J. Wu, H. Luo, T.

Wang, H. Sun, Q. Zhang, and Y. Chai. *Tetrahedron*, 2019, **75**, 1052-1063. (e) M. V. Reddy, G. C. S. Reddy, N. T. K. Lien, D. W. Kim and Y. T. Jeong, *Tetrahedron*, 2017, **73**, 1317-1323.

## Green matrix Calculation

### 1. For Our Work

Calculation of EcoScale score for the catalysed synthetic process to synthesize 2,4-diphenylbenzo[4,5]imidazo[1,2-a]pyrimidine.

#### EcoScale evaluation

Price calculated for 10 mmol reaction scale, prices obtained from Avra Synthesis Private Limited/and or Sigma-Aldrich (20.06.2024)

| Parameters                                                                             | Penalty points |
|----------------------------------------------------------------------------------------|----------------|
| <b>1</b> Yield: $(100 - \% \text{ of yield}) / 2 = (100 - 88) / 2 = 6$                 | 6              |
| <b>2.</b> Price of reaction components (to obtain 10 mmol of end product, <b>4</b> )   |                |
| <b>A.</b> acetophenone ( <b>1</b> ) = 11.3 mmol = 1.348 g = 0.012 USD                  |                |
| <b>B</b> 4-chlorobenzaldehyde ( <b>2</b> ) 11.3 mmol = 1.573g = 0.094 USD              |                |
| <b>C</b> 2-Amino-benzimidazole 11.3 mmole ( <b>3</b> ) = 1.4896 gm = 5.68 USD          |                |
| <b>D</b> Guanidine hydrochloride = 1.1 mmol = 0.124 g = 0.0061USD                      |                |
| Total cost of synthesis of <b>4</b> = 7.6881 USD                                       | 0              |
| Thus expensive, since \$ 10 < (total cost of synthesis of 10 mmol of <b>5</b> ) < \$50 |                |
| <b>3.</b> Safety:                                                                      | 0              |
| <b>4.</b> Technical setup                                                              |                |

|                                                                    |           |
|--------------------------------------------------------------------|-----------|
| Instruments for controlled addition of chemicals                   | 2         |
| <b>5.</b> Temperature/ Time                                        |           |
| Heating<1                                                          | 2         |
| <b>6.</b> Workup and purification                                  |           |
| Classical chromatography                                           | 10        |
| <b>Total penalty points:</b>                                       | <b>20</b> |
| <b>B.</b> Eco Scale calculation:                                   |           |
| <b>EcoScale score = (100-20) = 80(&gt; 75; it is an excellent)</b> |           |

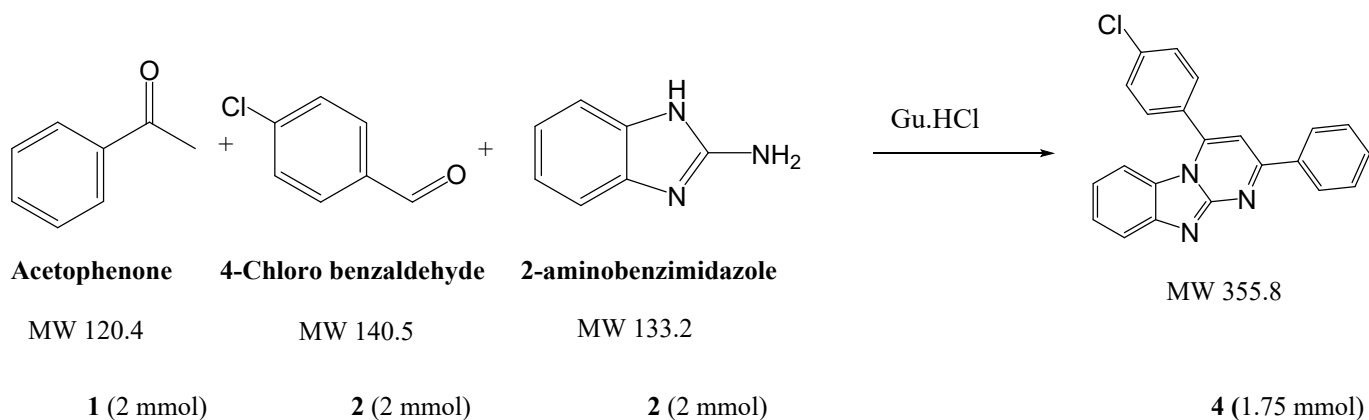

**Yield of product = 88 %**



$$\text{Atom Economy (\%)} = \frac{\text{Mol. Wt of Product}}{\text{Mol .wt of all reactants}} = \frac{355}{120.4+140.5+133.2} \times 100 = 90.07$$

$$\text{Atom efficiency (\%)} = (\% \text{ yield of product} \times \% \text{ atom economy}) \times 100 = (88 \% \times 90.07 \%) / 100 = 79.26 \%$$

$$\begin{aligned} \text{Carbon Efficiency (\%)} &= \frac{\text{No. of moles of product} \times \text{no. of carbons in product} \times 100}{(\text{Moles of 2} \times \text{no. of carbon in 1}) + (\text{Moles of 2} \times \text{no. of carbon in 2}) + (\text{Moles of 2} \times \text{no. of carbon in 3})} \\ &= \frac{1.75 \times 22 \times 100}{(2 \times 8) + (2 \times 7) + (2 \times 7)} = 87.5 \% \end{aligned}$$

$$\text{Reaction Mass Efficiency (\%)} = \frac{\text{Mass of isolated product}}{\text{Mass of all reactant}} \times 100 = \frac{0.626 \times 100}{0.240+0.280+0.266} = 79.64 \%$$

$$\text{Effective Mass Yield (\%)} \text{ EMY} = \frac{\text{Mass of isolated product}}{\text{Mass of raw materials + reagents}} \times 100 = \frac{0.626 \times 100}{0.240+0.280+0.266} = 79.64\%$$

$$\text{Mass Intensity (MI)} = \frac{\text{Mass of input materials excluding water}}{\text{Mass of raw material + reagents}} = \frac{0.626}{0.240+0.280+0.266} = 0.794 \text{ gm}$$

$$\text{Mass Productivity (MP)} = \frac{\text{Mass of product} \times 100}{\text{Mass of all input material excluding water}} = \frac{0.626 \times 100}{0.240+0.280+0.266} = 79.64\%$$

$$\text{Process Mass Efficacy} = \frac{\text{Mass of product} \times 100}{\text{Mass of all input material including water}} = \frac{0.626 \times 100}{0.240+0.280+0.266} = 79.64\%$$

$$\text{Process Mass Intensity} = \frac{\text{Mass of all input material}}{\text{Mass of product}} = \frac{0.240+0.280+0.266}{0.626} = 1.25 \text{ gm}$$

$$\text{Reaction Mass Intensity} = \frac{\text{mass of all raw materials} + \text{mass of all reagents}}{\text{Mass of product}} = \frac{0.240+0.280+0.266}{0.626} = 1.25 \text{ gm}$$

$$\text{Optimum Efficiency} = \frac{\text{Reaction Mass Efficiency} \times 100}{\text{Atom Economy}} = \frac{81.4 \times 100}{90.07} = 90.37\%$$

$$\text{Simple E factor} = \frac{(\text{Mass of all raw materials} + \text{mass of all raw reagents}) - \text{mass of product}}{\text{Mass of raw material} + \text{reagents}}$$

$$= \frac{(0.240+0.280+0.266)-0.626}{0.240+0.280+0.266} = 0.20 \text{ gm}$$

**Complete E Factor** =  $\frac{\text{Mass of all input material incl. water} - \text{mass of product}}{\text{Mass of product}}$

$$= \frac{(0.240+0.280+0.266)-0.626}{0.626} = 0.25 \text{ gm}$$

|                   | Compoundname                                                             | Mol. wt | Eq.wt | mMole | Amount   |
|-------------------|--------------------------------------------------------------------------|---------|-------|-------|----------|
| <b>Reactant1:</b> | acetophenone                                                             | 120.4   | 1     | 2     | 0.240 g  |
| <b>Reactant2</b>  | 4-chlorobenzaldehyde                                                     | 140.5   | 1     | 2     | 0.280 g  |
| <b>Reactant 3</b> | 2-Aminobenzimidazole                                                     | 133.15  | 1     | 2     | 0.266 g  |
| <b>Catalyst</b>   | Guanidine hydrochloride                                                  | 95.53   | 0.1   | 0.1   | 0.0955 g |
| <b>Product:</b>   | synthesize 4-(4-chlorophenyl)-2-phenylbenzo[4,5]imidazo[1,2-a]pyrimidine | 355.08  | 1     | 1.78  | 0.632 g  |

$$\text{E-factor} = \frac{\text{Total waste (g)}}{\text{Total product}} = \frac{(0.240+0.280+0.266)-0.626}{0.626} = 0.25 \text{ g waste/ g product}$$

Eco Scale = 100 - Sum of individual penalties = (100-20) = **80** (> 50; it is an acceptable synthesis)

## 2. Calculation of Green Matrix for ref. *J. Org. Chem* 2014, 79, 6905-691

Calculation of EcoScale score for the Regioselective Synthesis of Fused Imidazo[1,2-a]pyrimidines via Intramolecular C–N Bond Formation/6-Endo-Dig Cycloisomerization.

### EcoScale evaluation

Price calculated for 10 mmol reaction scale, prices obtained from Avra Synthesis Private Limited/and or Sigma-Aldrich (20.06.2024)

| Parameters |                                                                            | Penalty points |
|------------|----------------------------------------------------------------------------|----------------|
| <b>1</b>   | Yield: $(100 - \% \text{ of yield}) / 2 = (100 - 72) / 2 = 14$             | 14             |
| <b>2.</b>  | Price of reaction components (to obtain 10 mmol of end product, <b>4</b> ) |                |
| <b>A.</b>  | 2-Amino-benzimidazole ( <b>1</b> ) 13.88 mmol = 1.846 g = 7.08 USD         |                |
| <b>B</b>   | 4-chlorobenzaldehyde ( <b>2</b> ) 13.88 mmol = 1.94 g = 0.11 USD           |                |
| <b>C</b>   | phenylacetylene ( <b>3</b> ) = 27.76 mmol = 2.831 g = 3.07 USD             |                |
| <b>D</b>   | CuI (20 mol%) = 0.380 g = 0.0844 USD                                       |                |
| <b>E</b>   | Silver carbonate 20 mmol% = 0.540 g = 3.84 USD                             |                |

|                                                                                       |           |
|---------------------------------------------------------------------------------------|-----------|
| Total cost of synthesis of <b>4</b> = 14.18 USD                                       | 3         |
| Thus expensive, since \$ 10 > (total cost of synthesis of 10 mmol of <b>4</b> ) <\$50 |           |
| <b>3.</b> Safety: (F+)                                                                | 10        |
| <b>4.</b> Technical setup                                                             |           |
| Common setup                                                                          | 0         |
| <b>5.</b> Temperature/ Time                                                           |           |
| Heating, < 1 h                                                                        | 2         |
| <b>6.</b> Workup and purification                                                     |           |
| Classical chromatography                                                              | 10        |
| <b>Total penalty points:</b>                                                          | <b>39</b> |
| <b>B.</b> Eco Scale calculation:                                                      |           |
| <b>EcoScale score</b> = (100-26) = <b>61</b> (>50; it is an acceptable)               |           |

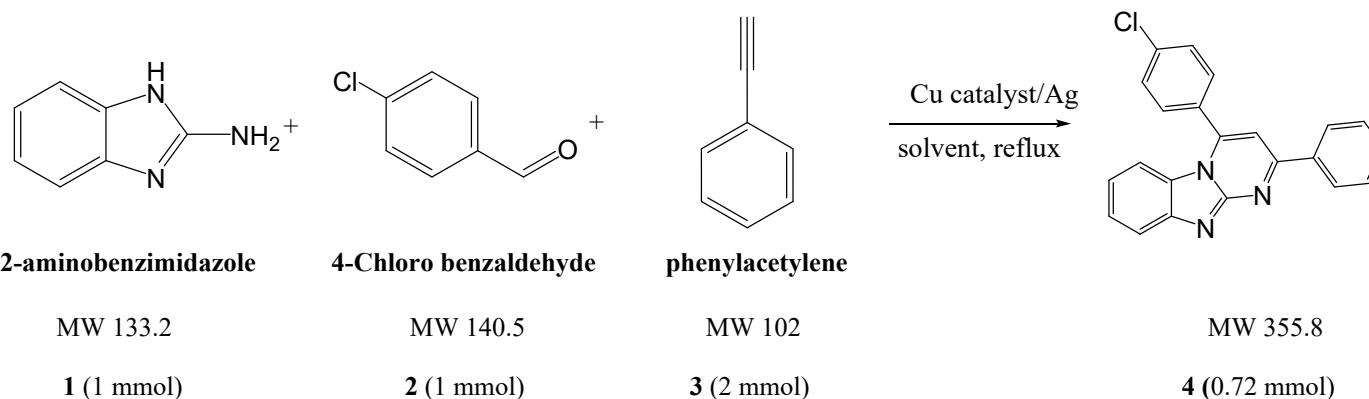

**Yield of product = 72 %**

|                   | Compoundname                                              | Mol. wt | Eq.wt | mMole | Amount  |
|-------------------|-----------------------------------------------------------|---------|-------|-------|---------|
| <b>Reactant1:</b> | 2-Amino-benzimidazole                                     | 134.2   | 1     | 1     | 0.133 g |
| <b>Reactant2</b>  | 4- chlorobenzaldehyde                                     | 140     | 1     | 1     | 0.140 g |
| <b>Reactant 3</b> | Phenylacetylene                                           | 102     | 2     | 2     | 0.204 g |
| <b>Catalyst</b>   | CuI                                                       | -       | -     | -     | 0.038 g |
|                   | Silver carbonate                                          | -       | -     | -     | 0.054   |
| <b>Product:</b>   | synthesize 2,4-diphenylbenzo[4,5]imidazo[1,2-a]pyrimidine | 364.4   | 1     | 1     | 0.355 g |

$$\text{Atom Economy (\%)} = \frac{\text{Mol. Wt of Product}}{\text{Mol. wt of all reactants}} \times 100 = \frac{355}{133.15+140.5+2 \times 102} \times 100 = 74.32 \%$$

$$\text{Atom efficiency (\%)} = (\% \text{ yield of product} \times \% \text{ atom economy}) / 100 = (72\% \times 74.32\%) / 100 = 53.51\%$$

$$\text{Carbon Efficiency (\%)} = \frac{\text{No. of moles of product} \times \text{no. of carbons in product} \times 100}{(\text{Moles of 1} \times \text{no. of carbon in 1}) + (\text{Moles of 1} \times \text{no. of carbon in 2}) + (\text{Moles of 2} \times \text{no. of carbon in 3})}$$

$$= \frac{0.72 \times 22 \times 100}{(1 \times 7) + (1 \times 7) + (2 \times 8)} = 79.2\%$$

$$\text{E-factor} = \frac{\text{Total waste (g)}}{\text{Total product}} = \frac{(0.133+0.140+0.204)-0.255}{0.255} = 0.87 \text{ g waste/ g product}$$

### 3. Calculation of Green Matrix for ref. New. J. Chem. 2015, 39,4977-4986)

Calculation of EcoScale score for the Molybdate sulfuric acid (MSA): an efficient solid acid catalyst for the synthesis of diversely functionalized fused imidazo[1,2-a] pyrimidines under solvent-free conditions

#### EcoScale evaluation

Price calculated for 10 mmol reaction scale, prices obtained from Avra Synthesis Private Limited /and or Sigma-Aldrich (20.06.2024)

| Parameters |                                                                                                                       | Penalty points |
|------------|-----------------------------------------------------------------------------------------------------------------------|----------------|
| <b>1</b>   | Yield: $(100 - \% \text{ of yield}) / 2 = (100 - 85) / 2 = 7.5$                                                       | 7.5            |
| <b>2.</b>  | Price of reaction components (to obtain 10 mmol of end product, <b>4</b> )                                            |                |
| <b>A.</b>  | 2-Amino-benzimidazole ( <b>1</b> ) 11.7 mmol = 1.55 g = 5.7 USD                                                       |                |
| <b>B</b>   | para-chloro benzaldehyde ( <b>2</b> ) 11.7 mmol = 1.63 g = 0.11 USD                                                   |                |
| <b>C</b>   | phenylacetylene ( <b>3</b> ) = 17.55 mmol = 1.790 g = 1.95 USD                                                        |                |
| <b>D</b>   | MSA (15 mol%) 1.755 mmol =<br>Anh. Sodium molybdate 1.755 mmol = 4.68 USD<br>Chlorosulfonic acid 3.51 mmol = 0.12 USD |                |
|            | Total cost of synthesis of <b>4</b> = 12.56 USD                                                                       | 3              |
|            | Thus expensive, since $\$ 10 < (\text{total cost of synthesis of 10 mmol of } \mathbf{4a}) < \$50$                    |                |
| <b>3.</b>  | Safety: (F+)                                                                                                          | 10             |
| <b>4.</b>  | Technical setup                                                                                                       |                |
|            | Common setup                                                                                                          | 0              |
| <b>5.</b>  | Temperature/ Time                                                                                                     |                |
|            | Heating, > 1 h                                                                                                        | 3              |



|                                                                        |             |
|------------------------------------------------------------------------|-------------|
| <b>6. Workup and purification</b>                                      |             |
| Classical chromatography                                               | 10          |
| <b>Total penalty points:</b>                                           | <b>33.5</b> |
| <b>B. Eco Scale calculation:</b>                                       |             |
| <b>EcoScale score = (100-33.5) = 66.5(&gt; 75; it is an excellent)</b> |             |

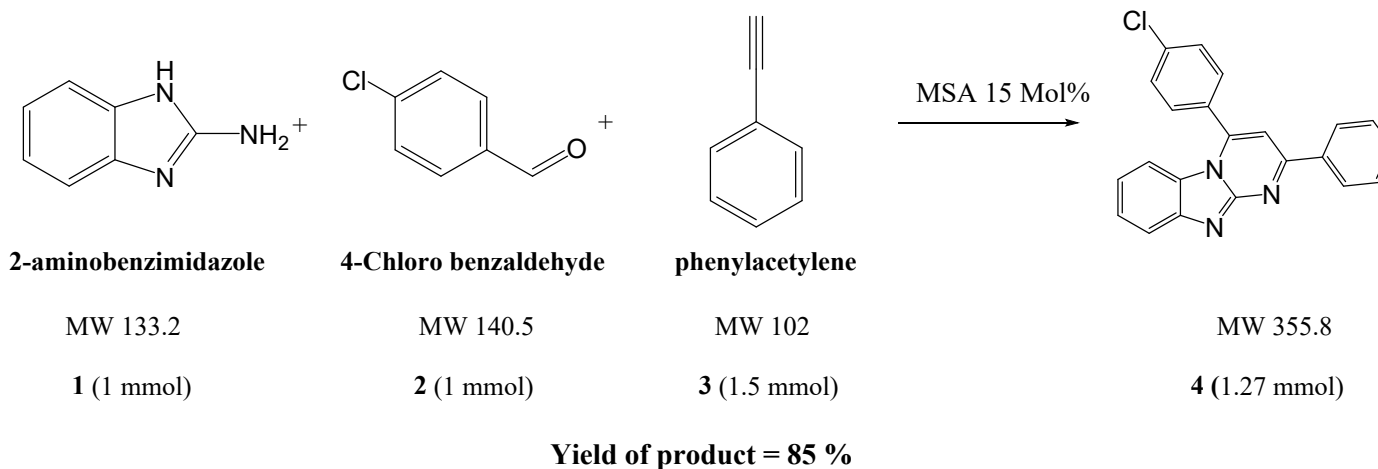

|                   | Compoundname             | Mol. wt | Eq.wt | mMole | Amount  |
|-------------------|--------------------------|---------|-------|-------|---------|
| <b>Reactant1:</b> | 2-Amino-benzimidazole    | 133.1   | 1     | 1     | 0.133 g |
| <b>Reactant2</b>  | Para-chloro benzaldehyde | 140     | 1     | 1     | 0.140 g |

|                   |                                                           |       |     |     |         |
|-------------------|-----------------------------------------------------------|-------|-----|-----|---------|
| <b>Reactant 3</b> | Phenylacetylene                                           | 102   | 1.5 | 1.5 | 0.153 g |
| <b>Catalyst</b>   | MSA                                                       | 95.53 | 0.1 | -   | 0g      |
| <b>Product:</b>   | synthesize 2,4-diphenylbenzo[4,5]imidazo[1,2-a]pyrimidine | 355   | 1   | 1   | 0.355 g |

$$\text{Atom Economy (\%)} = \frac{\text{Mol. Wt of Product}}{\text{Mol .wt of all reactants}} = \frac{355}{133.15+140.5+1.5 \times 102} \times 100 = 83.33$$

$$\text{Atom efficiency (\%)} = (\% \text{ yield of product} \times \% \text{ atom economy}) / 100 = (85\% \times 83.33 \%) / 100 = 70.83 \%$$

$$\text{Carbon Efficiency (\%)} = \frac{\text{No. of moles of product} \times \text{no. of carbons in product} \times 100}{(\text{Moles of 1} \times \text{no. of carbon in 1}) + (\text{Moles of 1} \times \text{no. of carbon in 2}) + (\text{Moles of 1.5} \times \text{no. of carbon in 3})}$$

$$= \frac{0.85 \times 22 \times 100}{(1 \times 7) + (1 \times 7) + (1.5 \times 8)} = 71.92\%$$

$$\text{4. Calculation E-factor} = \frac{\text{Total waste (g)}}{\text{Total product}} = \frac{(0.133+0.140+0.153)-0.301}{0.301} = 0.4152 \text{ g waste/ g product}$$

Calculation of EcoScale score for synthesis of imidazo[1,2-a] pyrimidine derivatives, their optical properties and selective fluorescent sensor towards zinc ion

**EcoScale evaluation**

Price calculated for 10 mmol reaction scale, prices obtained from Avra Synthesis Private Limited /and or Sigma-Aldrich (20.06.2024)

| Parameters |                                                                                          | Penalty points |
|------------|------------------------------------------------------------------------------------------|----------------|
| <b>1</b>   | Yield: $(100 - \% \text{ of yield}) / 2 = (100 - 90) / 2 = 5$                            | 5              |
| <b>2.</b>  | Price of reaction components (to obtain 10 mmol of end product, <b>4</b> )               |                |
| <b>A.</b>  | 2-Amino-benzimidazole ( <b>1</b> ) 11.1 mmol = 1.476 g = 5.68 USD                        |                |
| <b>B</b>   | para-chloro benzaldehyde ( <b>2</b> ) 11.1 mmol = 1.5 g = 0.1 USD                        |                |
| <b>C</b>   | phenylacetylene ( <b>3</b> ) = 11.1 mmol = 1.132 g = 1.23 USD                            |                |
| <b>D</b>   | CuO NPs 0.2g = 0.0104 USD                                                                |                |
|            | Total cost of synthesis of <b>4</b> = <b>6.9304</b> USD                                  | 0              |
|            | Thus expensive, since \$ 10 < (total cost of synthesis of 0.5 mmol of <b>4b</b> ) < \$50 |                |
| <b>3.</b>  | Safety: (F+)                                                                             | 10             |
| <b>4.</b>  | Technical setup                                                                          |                |
|            | Common setup                                                                             | 0              |
| <b>5.</b>  | Temperature/ Time                                                                        |                |
|            | Heating < 1                                                                              | 2              |
| <b>6.</b>  | Workup and purification                                                                  |                |
|            | Classical chromatography                                                                 | 10             |

|                                                                    |           |
|--------------------------------------------------------------------|-----------|
| <b>Total penalty points:</b>                                       | <b>27</b> |
| <b>B. Eco Scale calculation:</b>                                   |           |
| <b>EcoScale score = (100-27) = 73(&gt; 75; it is an excellent)</b> |           |

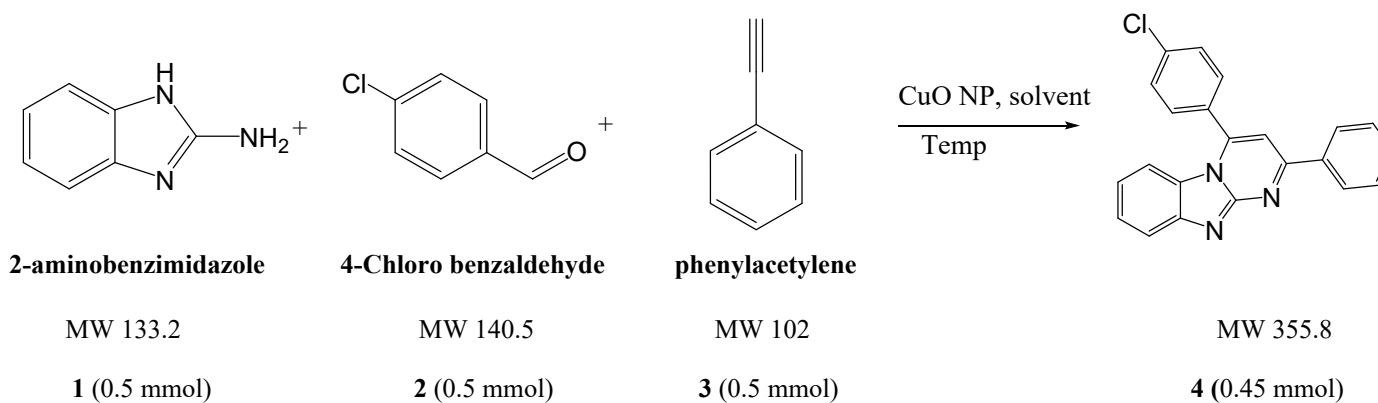

**Yield of product = 90 %**

$$\text{Atom Economy (\%)} = \frac{\text{Mol. Wt of Product}}{\text{Mol. wt of all reactants}} = \frac{355}{133.15+140.5+102.14} \times 100 = 94.16$$

$$\text{Atom efficiency (\%)} = (\% \text{ yield of product} \times \% \text{ atom economy}) / 100 = (90 \% \times 94.46 \%) / 100 = 85.01 \%$$

$$\text{Carbon Efficiency (\%)} = \frac{\text{No. of moles of product} \times \text{no. of carbons in product} \times 100}{(\text{Moles of } 0.5 \times \text{no. of carbon in 1}) + (\text{Moles of } 0.5 \times \text{no. of carbon in 2}) + (\text{Moles of } 0.5 \times \text{no. of carbon in 3})}$$

$$= \frac{0.45 \times 22 \times 100}{(0.5 \times 7) + (0.5 \times 7) + (0.5 \times 8)} = 90 \%$$

|                   | Compoundname                                              | Mol. wt | Eq.wt | mMole | Amount  |
|-------------------|-----------------------------------------------------------|---------|-------|-------|---------|
| <b>Reactant1:</b> | 2-Amino-benzimidazole                                     | 133.1   | 1     | 0.5   | 0.066 g |
| <b>Reactant2</b>  | Para-chloro benzaldehyde                                  | 140.5   | 1     | 0.5   | 0.070 g |
| <b>Reactant 3</b> | Phenylacetylene                                           | 102     | 1     | 0.5   | 0.051g  |
| <b>Catalyst</b>   | CuO NPs                                                   | 95.53   | 0.1   | -     | 0.01 g  |
| <b>Product:</b>   | synthesize 2,4-diphenylbenzo[4,5]imidazo[1,2-a]pyrimidine | 355     | 1     | 0.45  | 0.1775g |

$$\text{E-factor} = \frac{\text{Total waste (g)}}{\text{Total product}} = \frac{(0.066+0.070+0.051)-0.16}{0.16} = 0.168 \text{ g waste/ g product}$$

5. Calculation of Green Matrix for ref. Tetrahedron 2019, 75, 1052-1063)

Calculation of EcoScale score for the Diverse synthesis of pyrimido[1,2-a]benzimidazoles and imidazo[2,1-b]benzothiazoles via CuI-catalyzed decarboxylic multicomponent reactions of heterocyclic azoles, aldehydes and alkynecarboxylic acids

**Table 1. EcoScale evaluation**

Price calculated for 10 mmol reaction scale, prices obtained from Avra Synthesis Private Limited /and or Sigma-Aldrich (20.06.2024)

| Parameters |                                                                                         | Penalty points |
|------------|-----------------------------------------------------------------------------------------|----------------|
| <b>1</b>   | Yield: $(100 - \% \text{ of yield}) / 2 = (100 - 62) / 2 = 19$                          | 19             |
| <b>2.</b>  | Price of reaction components (to obtain 10 mmol of end product, <b>4</b> )              |                |
| <b>A.</b>  | 2-Amino-benzimidazole ( <b>1</b> ) 16.12 mmol = 2.143 g = 8.22 USD                      |                |
| <b>B</b>   | 4- chlorobenzaldehyde ( <b>2</b> ) 17.73 mmol = 2.482 g = 0.15 USD                      |                |
| <b>C</b>   | phenylpropionic acid ( <b>3</b> ) = 19.34 mmol = 2.823 g = 17.47 USD                    |                |
| <b>D</b>   | CuI (1 mmol) = 0.198 g = 0.044 USD                                                      |                |
| <b>E</b>   | K <sub>2</sub> CO <sub>3</sub> 12 mmol = 1.65 g = 0.031 USD                             |                |
|            | Total cost of synthesis of <b>4</b> = 25.915 USD                                        | 3              |
|            | Thus expensive, since \$ 10 < (total cost of synthesis of 10 mmol of <b>4a</b> ) < \$50 |                |
| <b>3.</b>  | Safety: DMSO                                                                            | 0              |
| <b>4.</b>  | Technical setup                                                                         |                |
|            | Common setup                                                                            | 0              |

|                                                                     |           |
|---------------------------------------------------------------------|-----------|
| <b>5.</b> Temperature/ Time                                         |           |
| Heating, > 1 h                                                      | 3         |
| <b>6.</b> Workup and purification                                   |           |
| Classical chromatography                                            | 10        |
| <b>Total penalty points:</b>                                        | <b>35</b> |
| <b>B.</b> Eco Scale calculation:                                    |           |
| <b>EcoScale score = (100-35) = 65 (&gt;50; it is an acceptable)</b> |           |

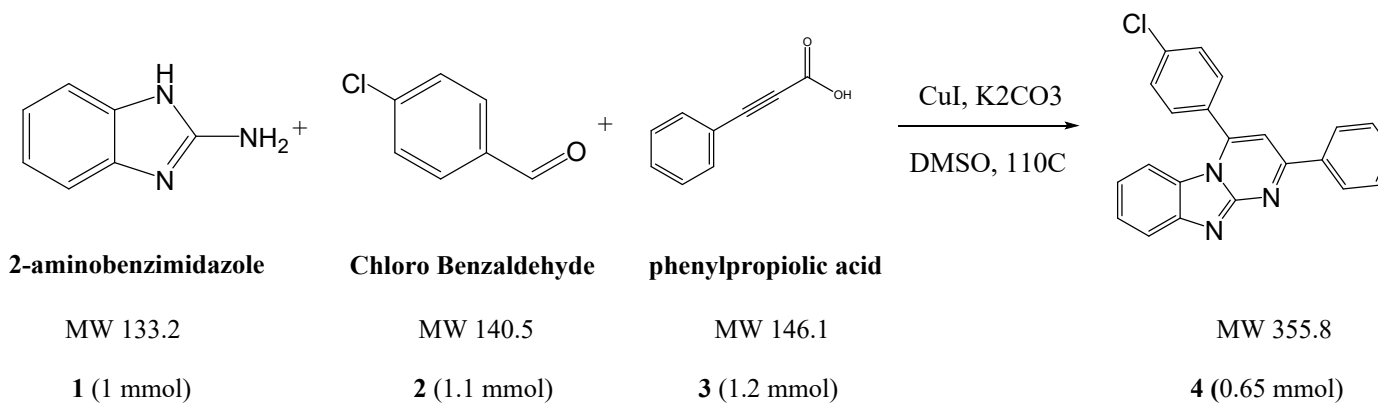

**Yield of product = 62 %**

|                   | Compoundname                                              | Mol. wt | Eq.wt | mMole | Amount  |
|-------------------|-----------------------------------------------------------|---------|-------|-------|---------|
| <b>Reactant1:</b> | 2-Amino-benzimidazole                                     | 133.1   | 1     | 1     | 0.133 g |
| <b>Reactant2</b>  | 4- chlorobenzaldehyde                                     | 140     | 1     | 1.1   | 0.154 g |
| <b>Reactant 3</b> | phenylpropionic acid                                      | 146     | 1     | 1.2   | 0.175g  |
| <b>Catalyst</b>   | CuI                                                       | 95.53   | 0.1   | 1     | 0.019 g |
|                   | K <sub>2</sub> CO <sub>3</sub>                            |         |       | 1.2   | 0.166 g |
| <b>Product:</b>   | synthesize 2,4-diphenylbenzo[4,5]imidazo[1,2-a]pyrimidine | 355     | 1     | 1     | 0.355 g |

$$\text{Atom Economy (\%)} = \frac{\text{Mol. Wt of Product}}{\text{Mol .wt of all reactants}} = \frac{355}{133.15+1.1 \times 140.5+1.2 \times 146} \times 100 = 79.09 \%$$

$$\text{Atom efficiency (\%)} = (\% \text{ yield of product} \times \% \text{ atom economy}) / 100 = (62\% \times 79.09 \%) / 100 = 49.03 \%$$

$$\text{Carbon Efficiency (\%)} = \frac{\text{No. of moles of product} \times \text{no. of carbons in product} \times 100}{(\text{Moles of 1} \times \text{no. of carbon in 1}) + (\text{Moles of 1.1} \times \text{no. of carbon in 2}) + (\text{Moles of 1.2} \times \text{no. of carbon in 3})}$$

$$= \frac{0.62 \times 22 \times 100}{(1 \times 7) + (1.1 \times 7) + (1.2 \times 9)} = 53.49\%$$

$$\text{E-factor} = \frac{\text{Total waste (g)}}{\text{Total product}} = \frac{(0.133+0.154+0.175)-0.230}{0.230} = 1.008 \text{ g waste/ g product}$$





Summary of Green Matrix

| Ref.                                     | Ecoscale  | Atom Economy (%) | Atom efficiency (%) | Carbon efficiency (%) | E factor    |
|------------------------------------------|-----------|------------------|---------------------|-----------------------|-------------|
| <b>Our work</b>                          | <b>80</b> | <b>90.07</b>     | <b>79.26</b>        | <b>87.5</b>           | <b>0.25</b> |
| <i>J.Org. Chem.</i> 2014, 79, 6905-6912  | 61        | 74.32            | 53.51               | 79.2                  | 0.87        |
| <i>New. J. Chem.</i> 2015, 39, 4977-4986 | 66.5      | 83.33            | 70.83               | 71.92                 | 0.4152      |
| <i>Tet. Lett.</i> 2018, 59, 2341-2346    | 73        | 94.16            | 85.01               | 90                    | 0.168       |
| <i>Tetrahedron</i> 2019, 75, 1052-1063   | 65        | 79.09            | 49.03               | 53.49                 | 1.008       |

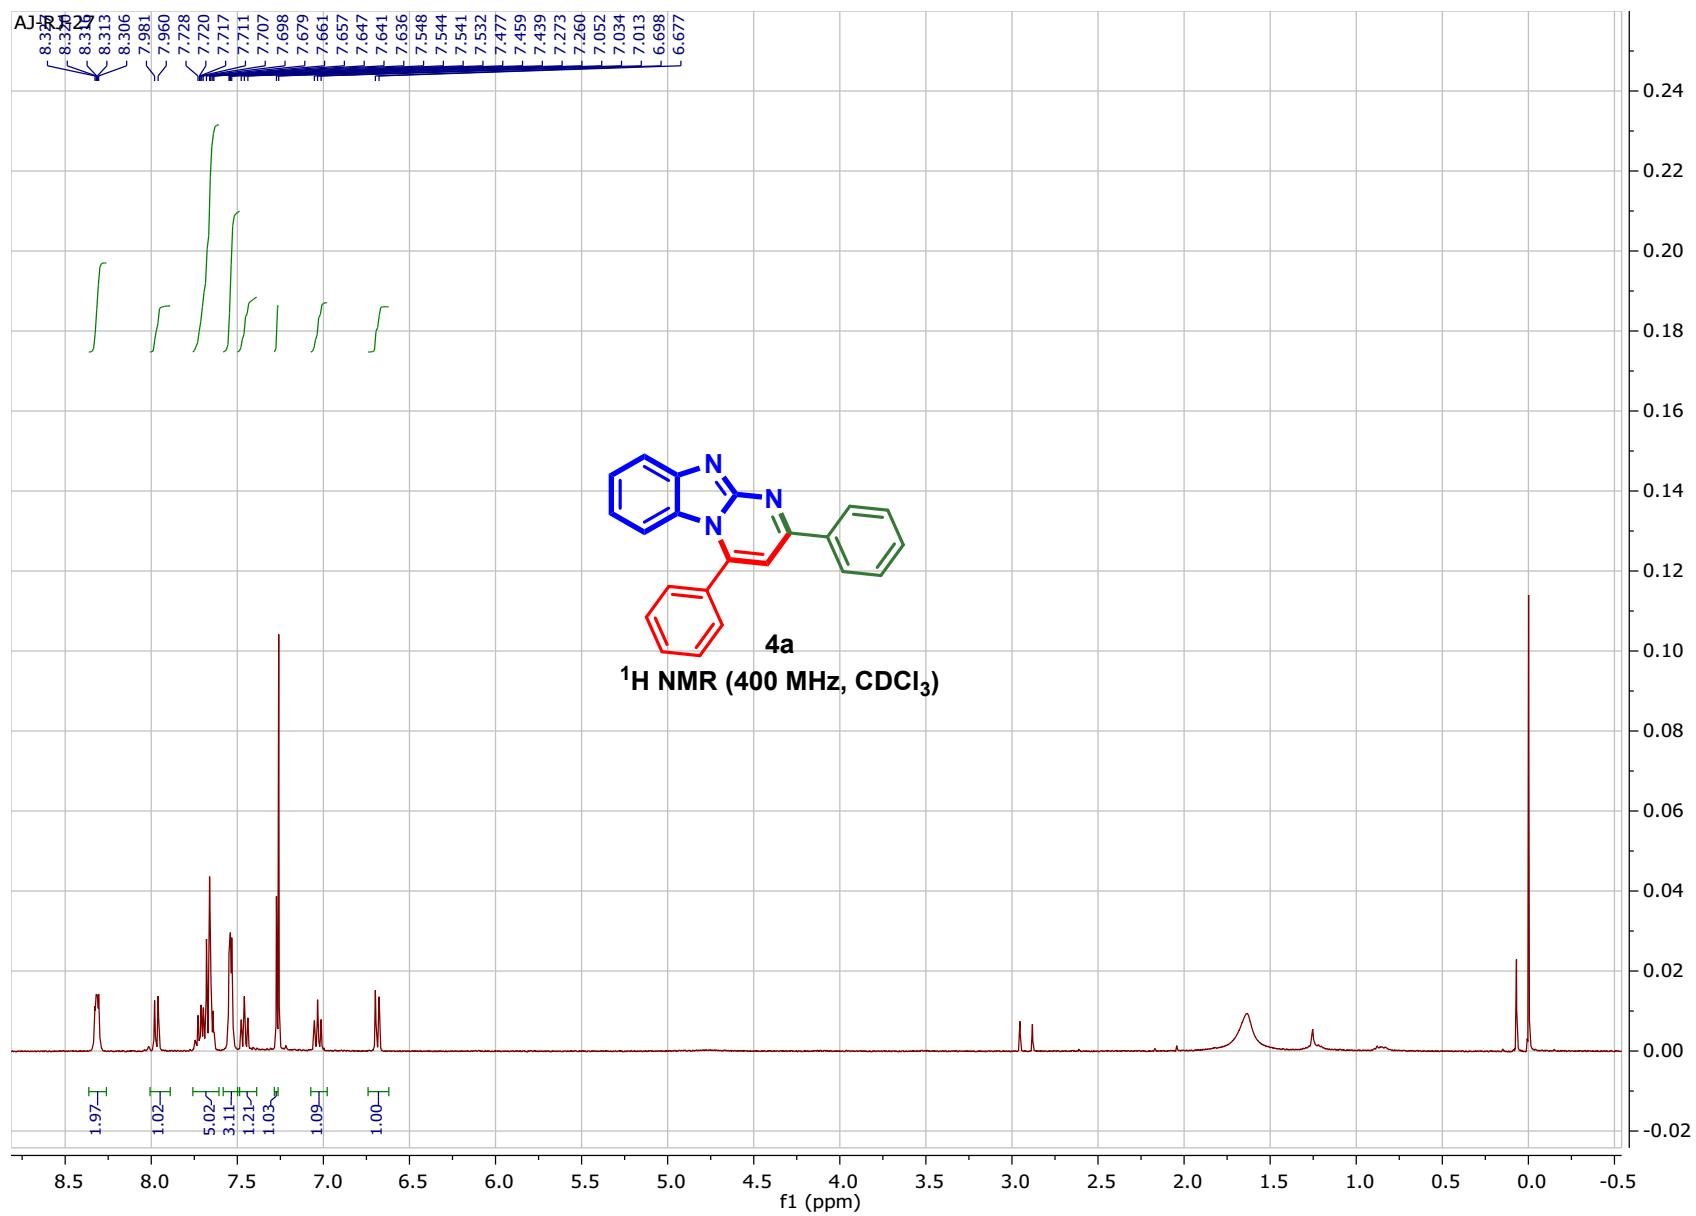

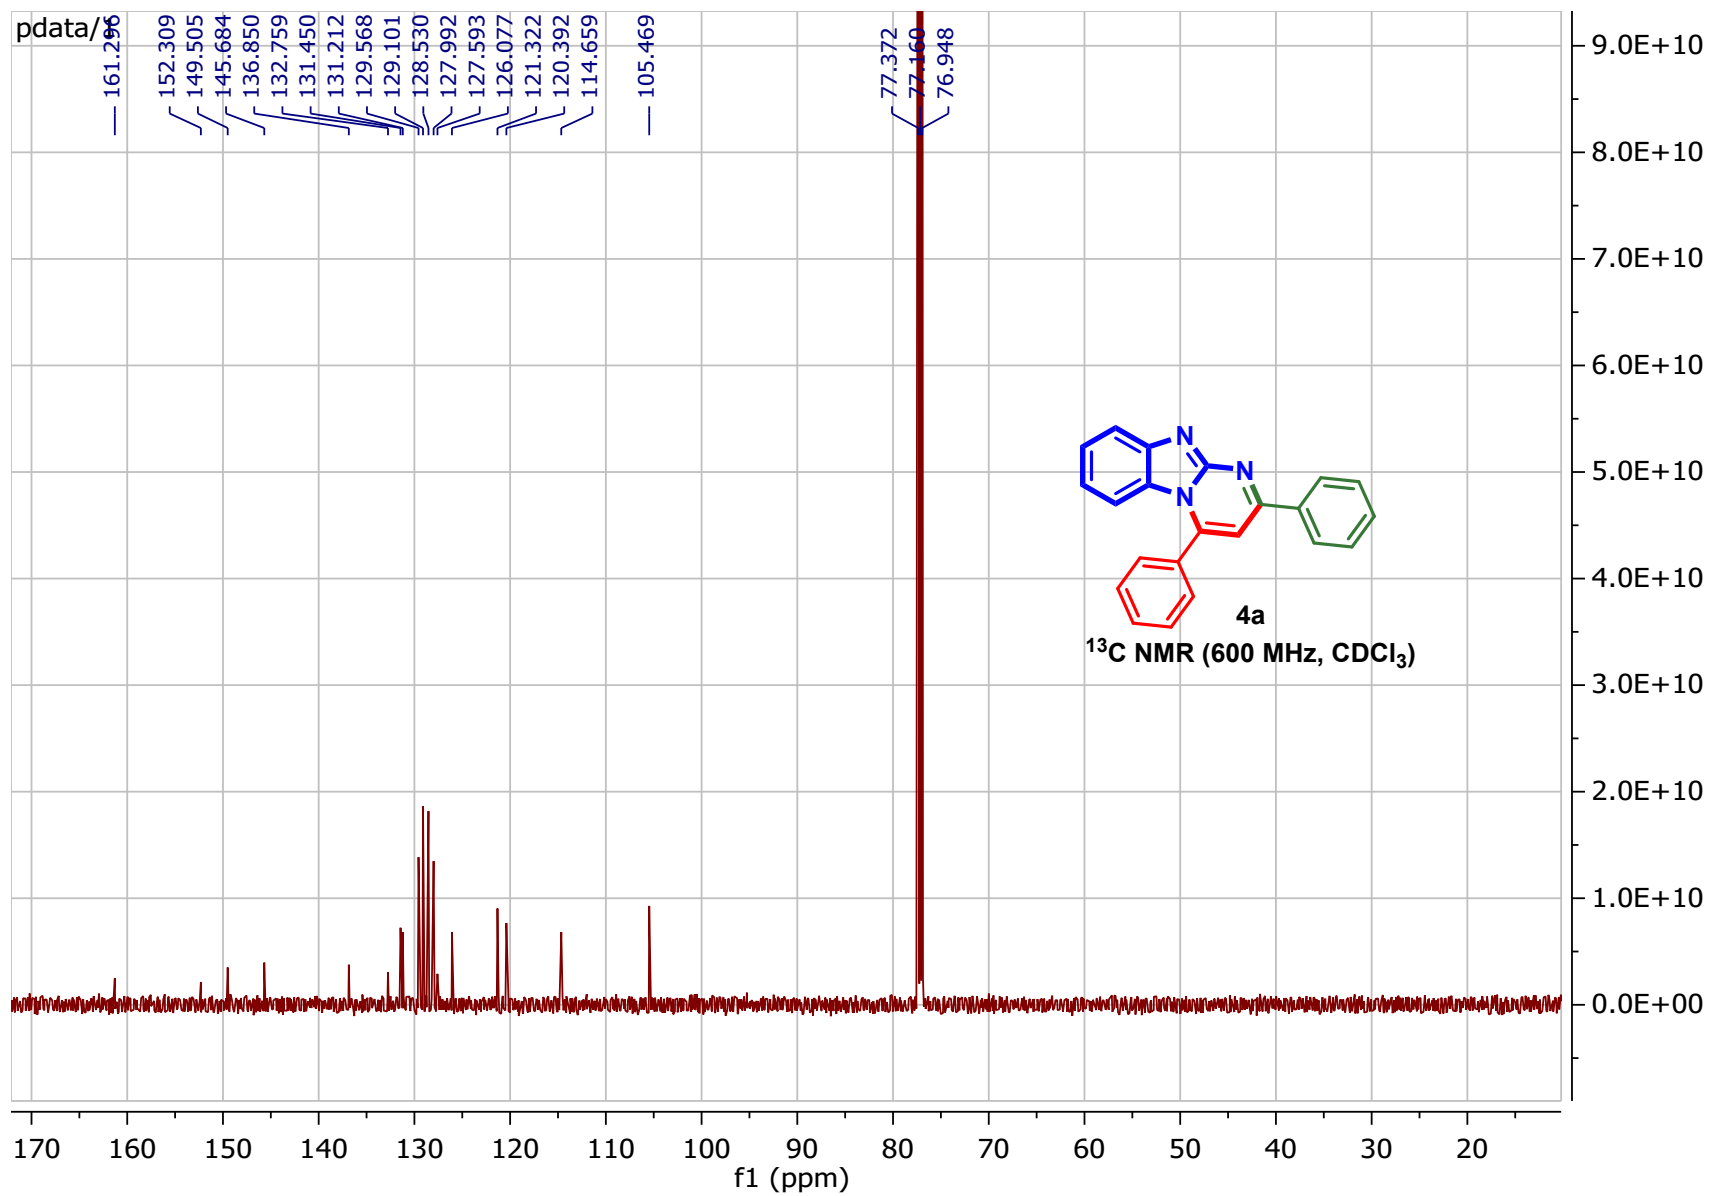

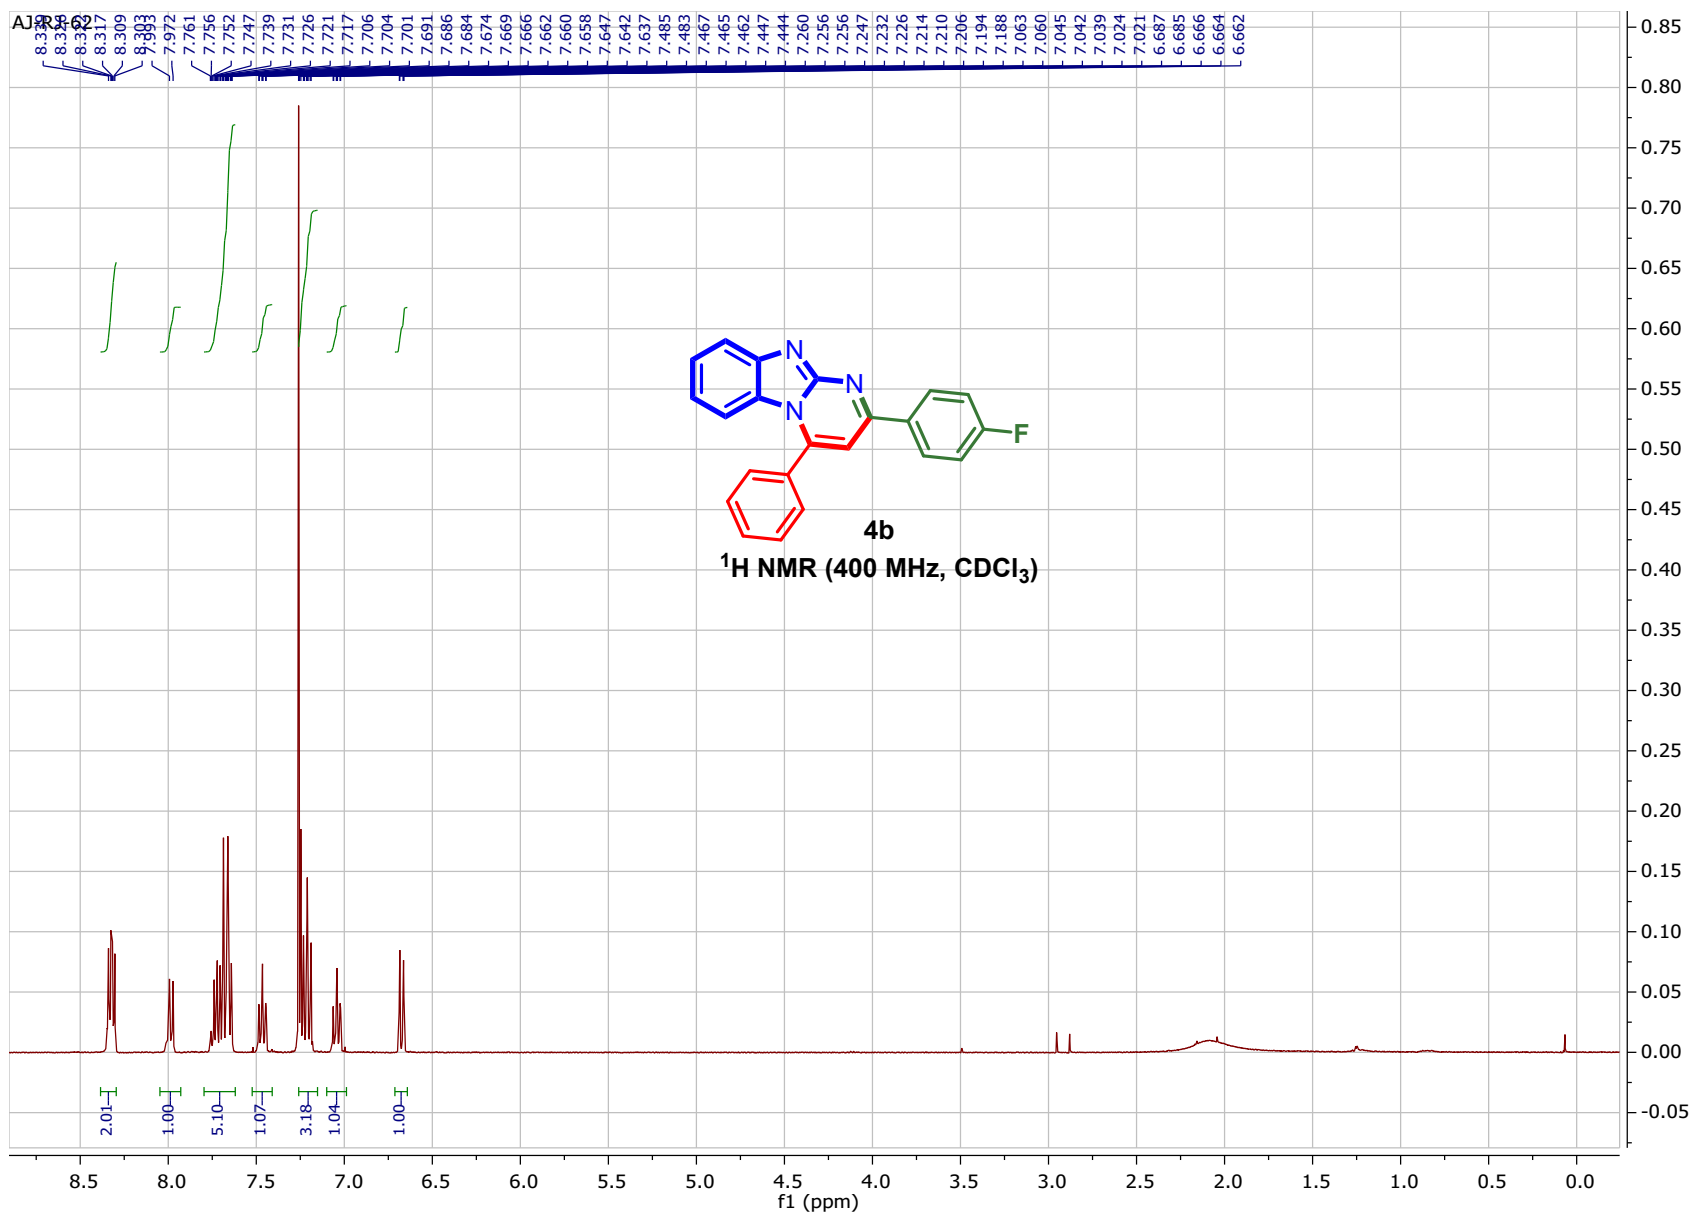

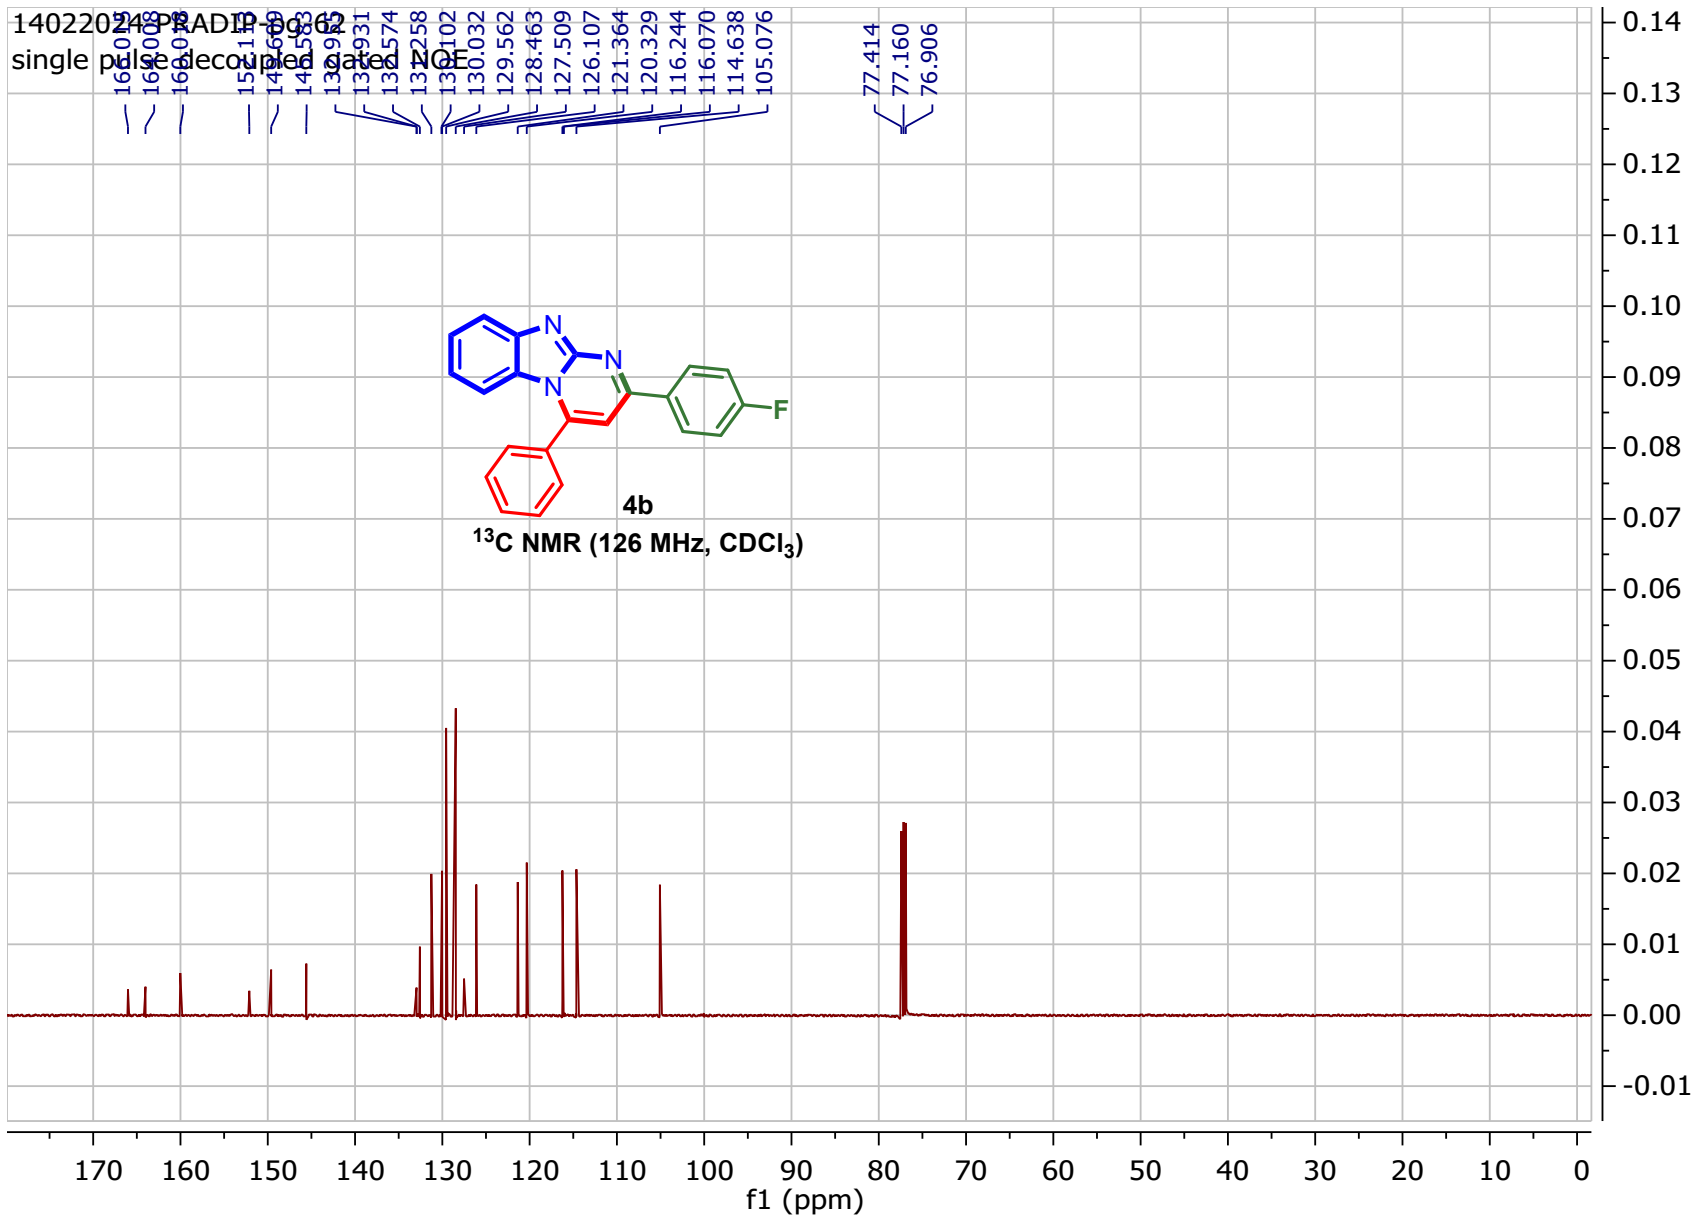

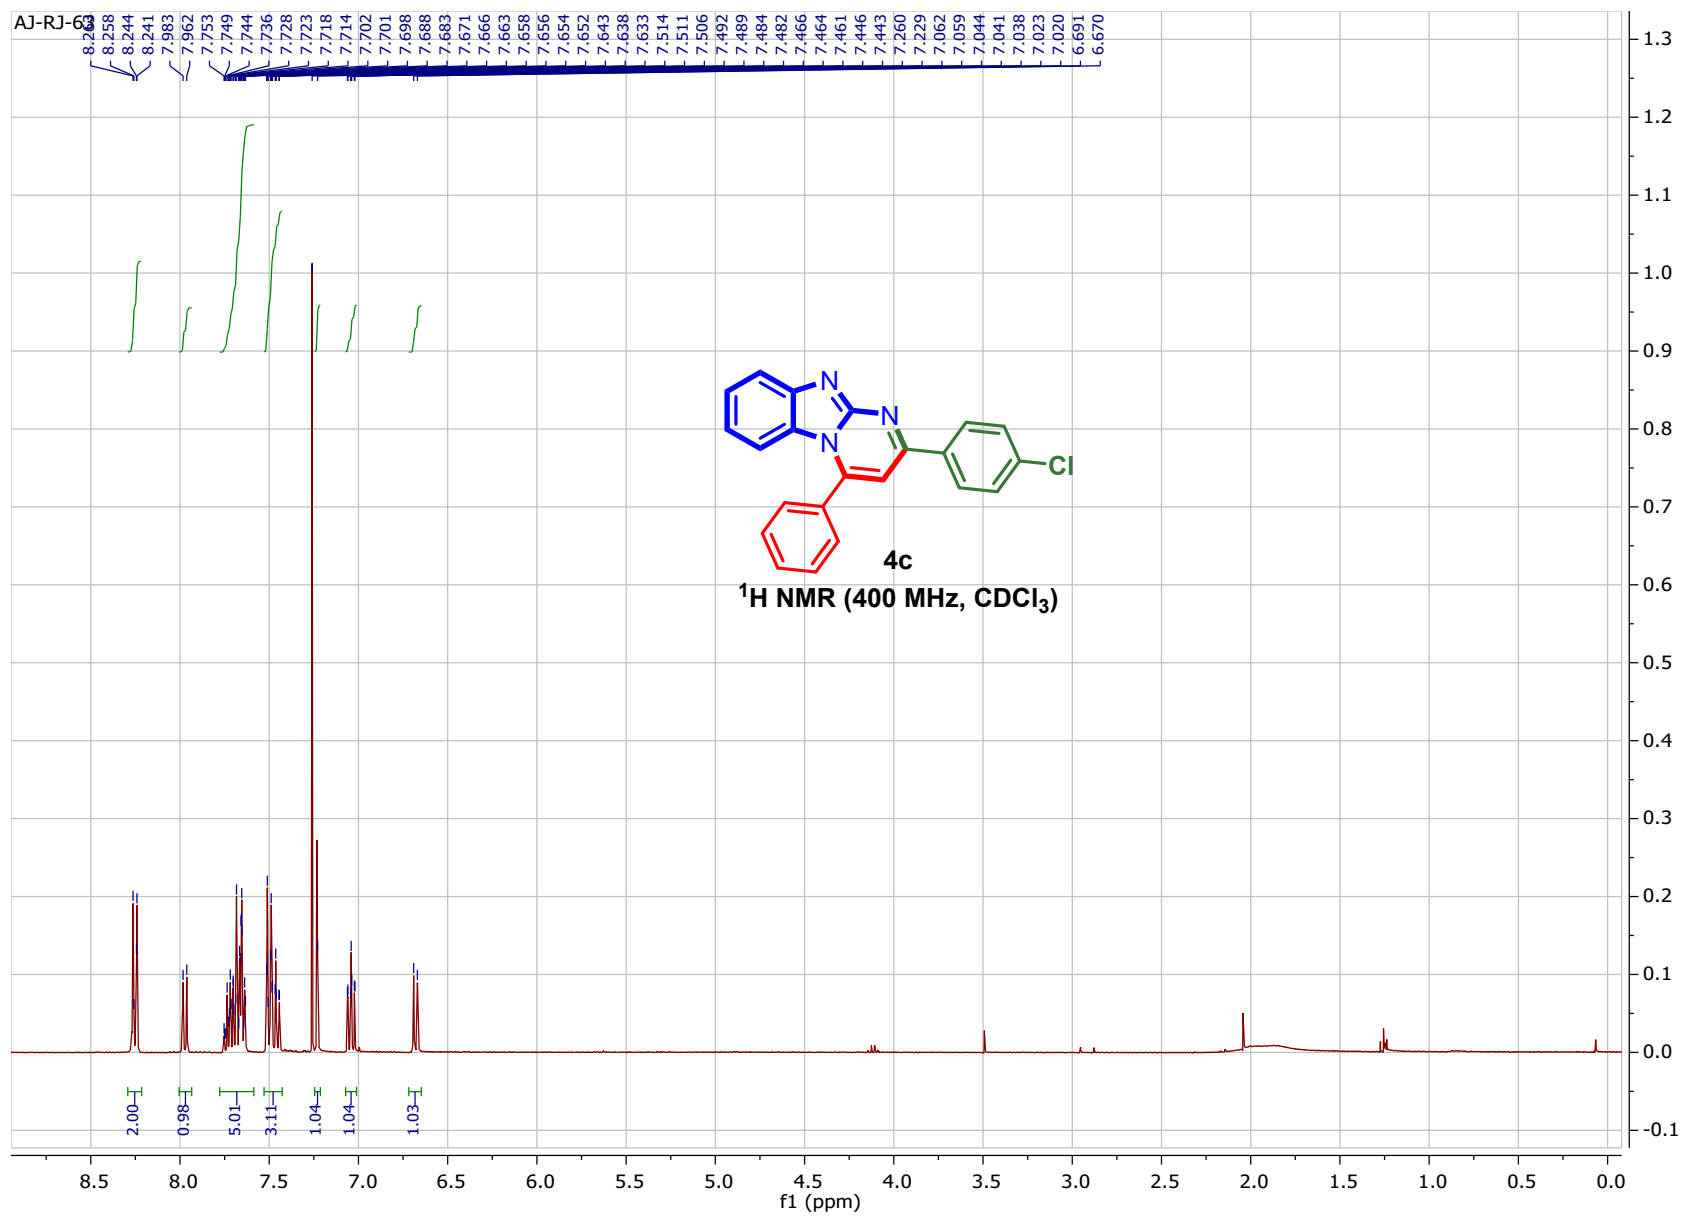

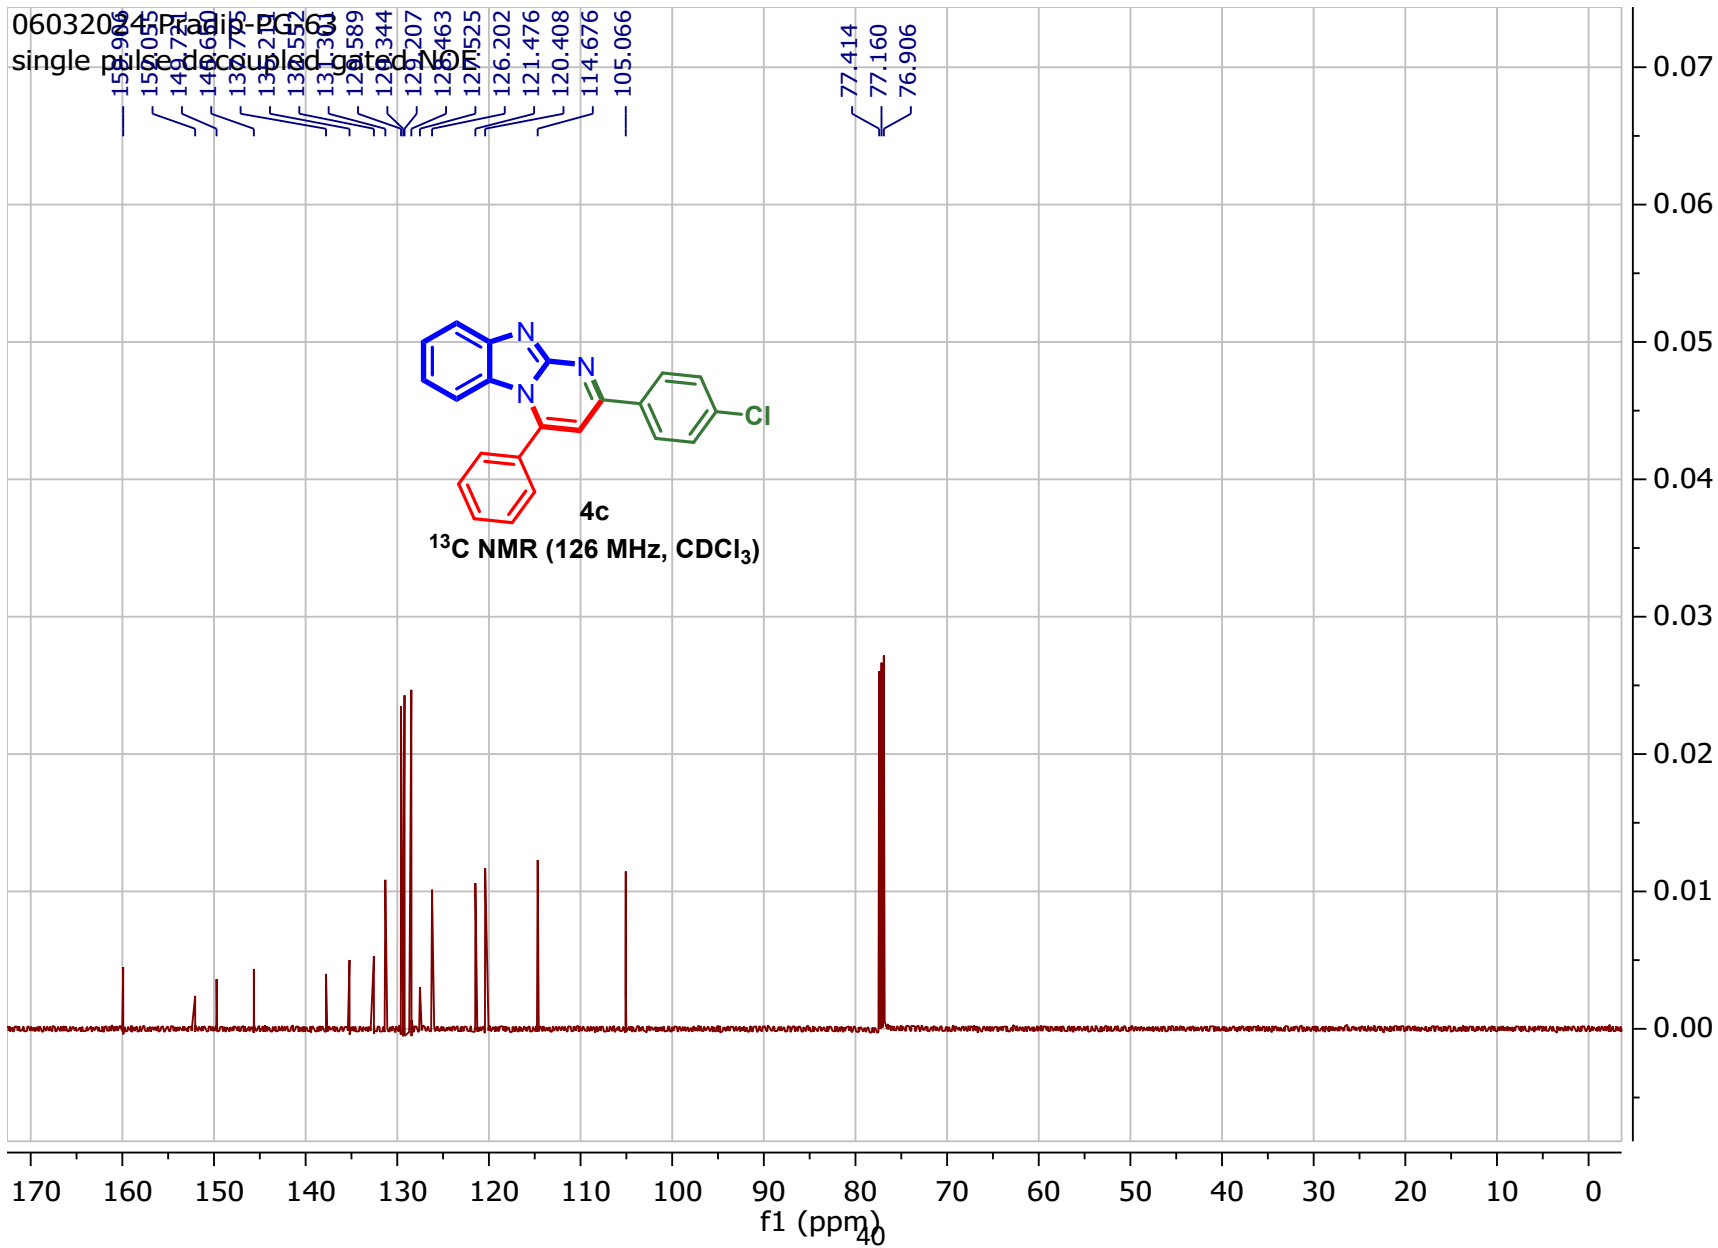



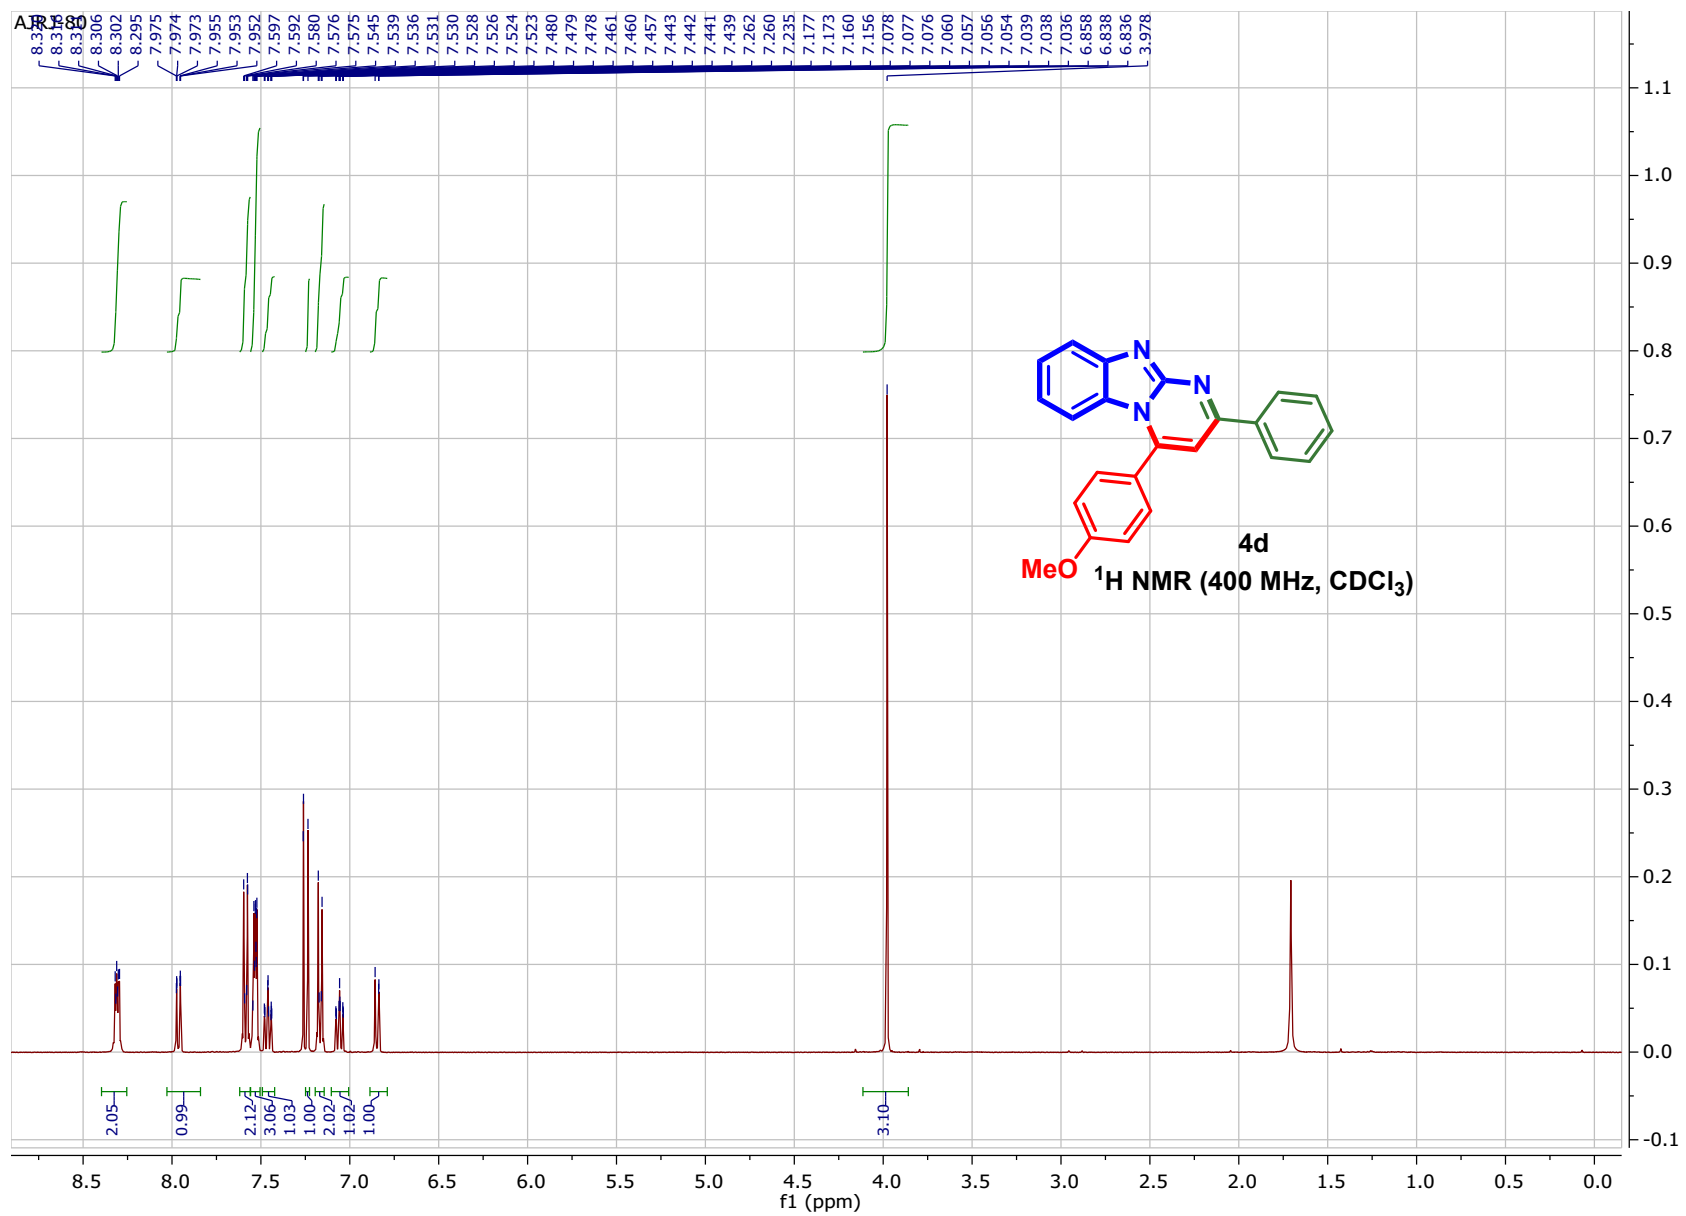

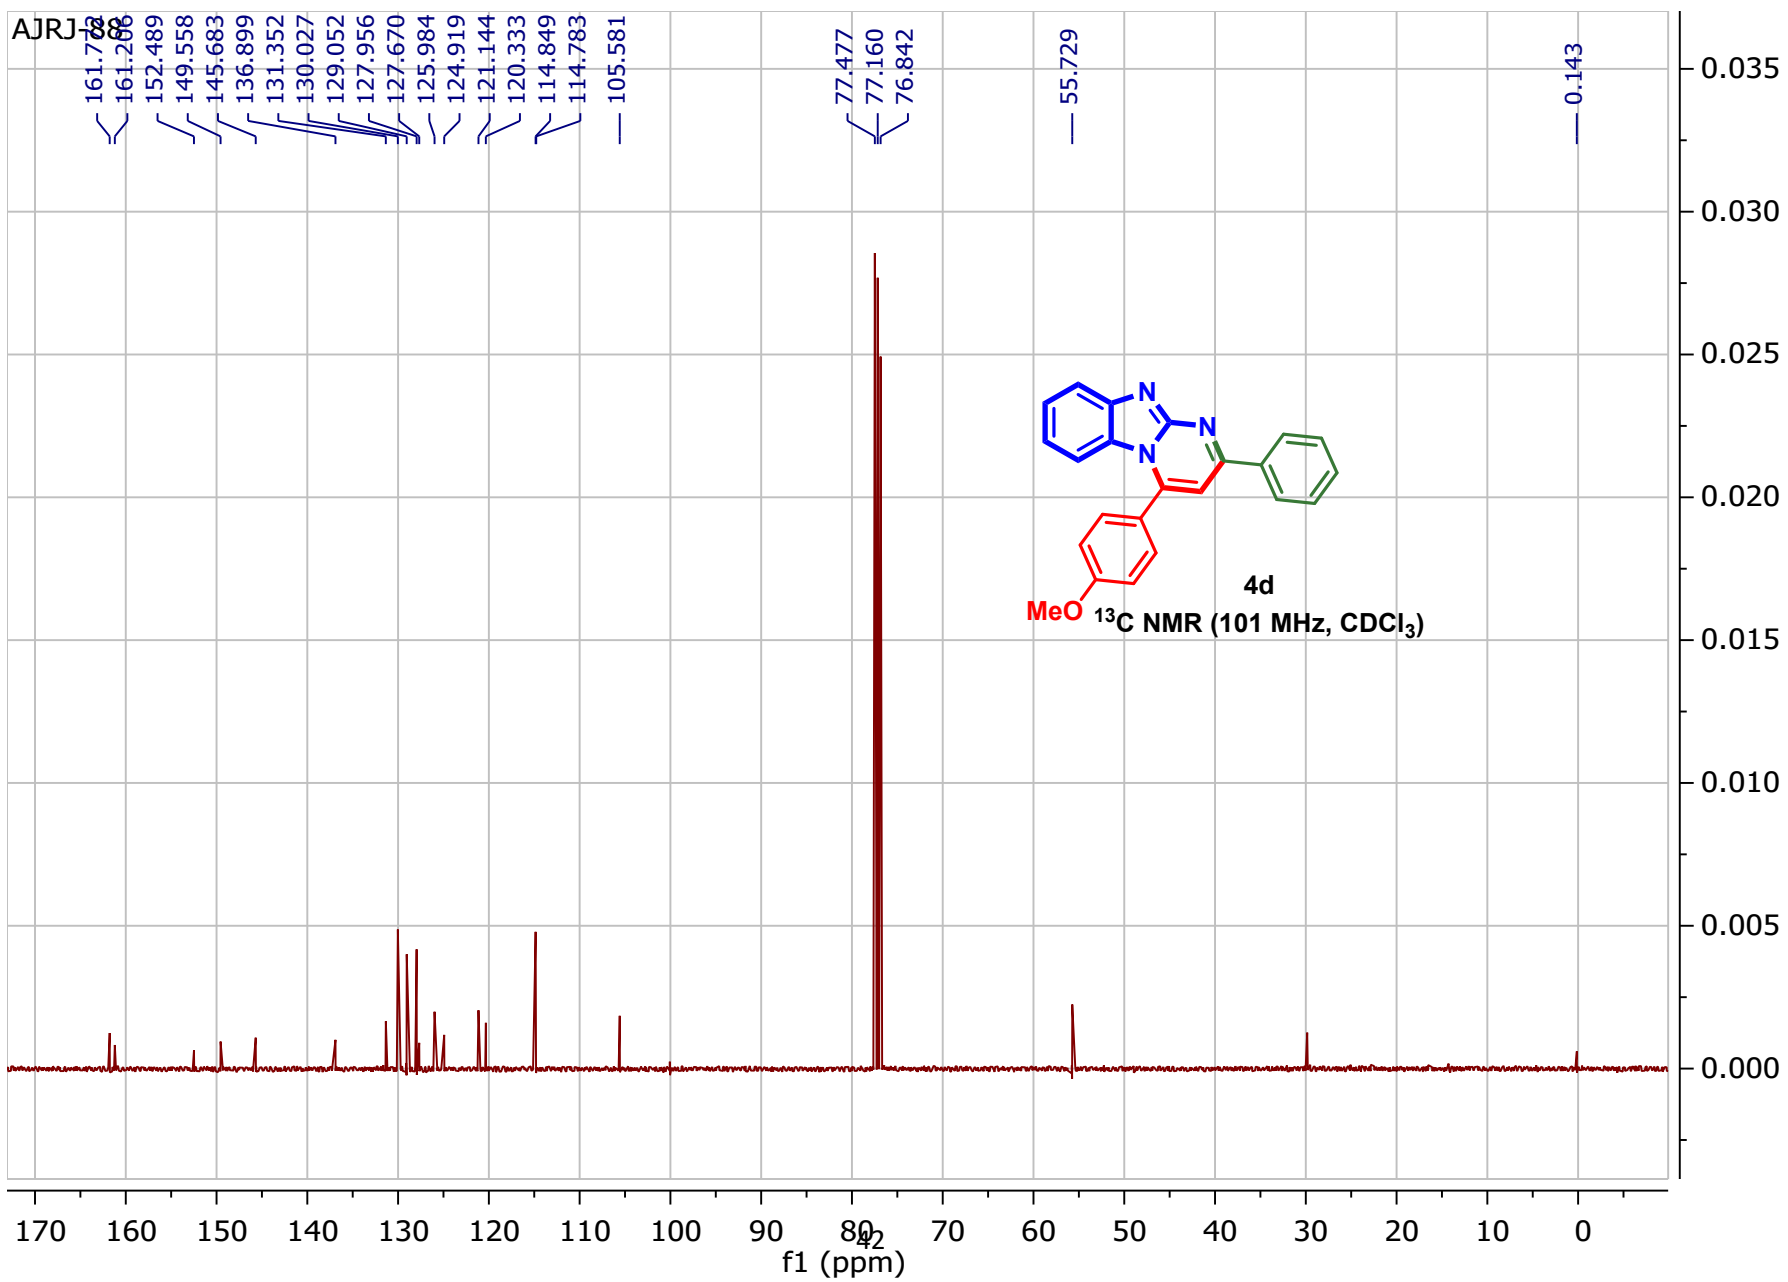

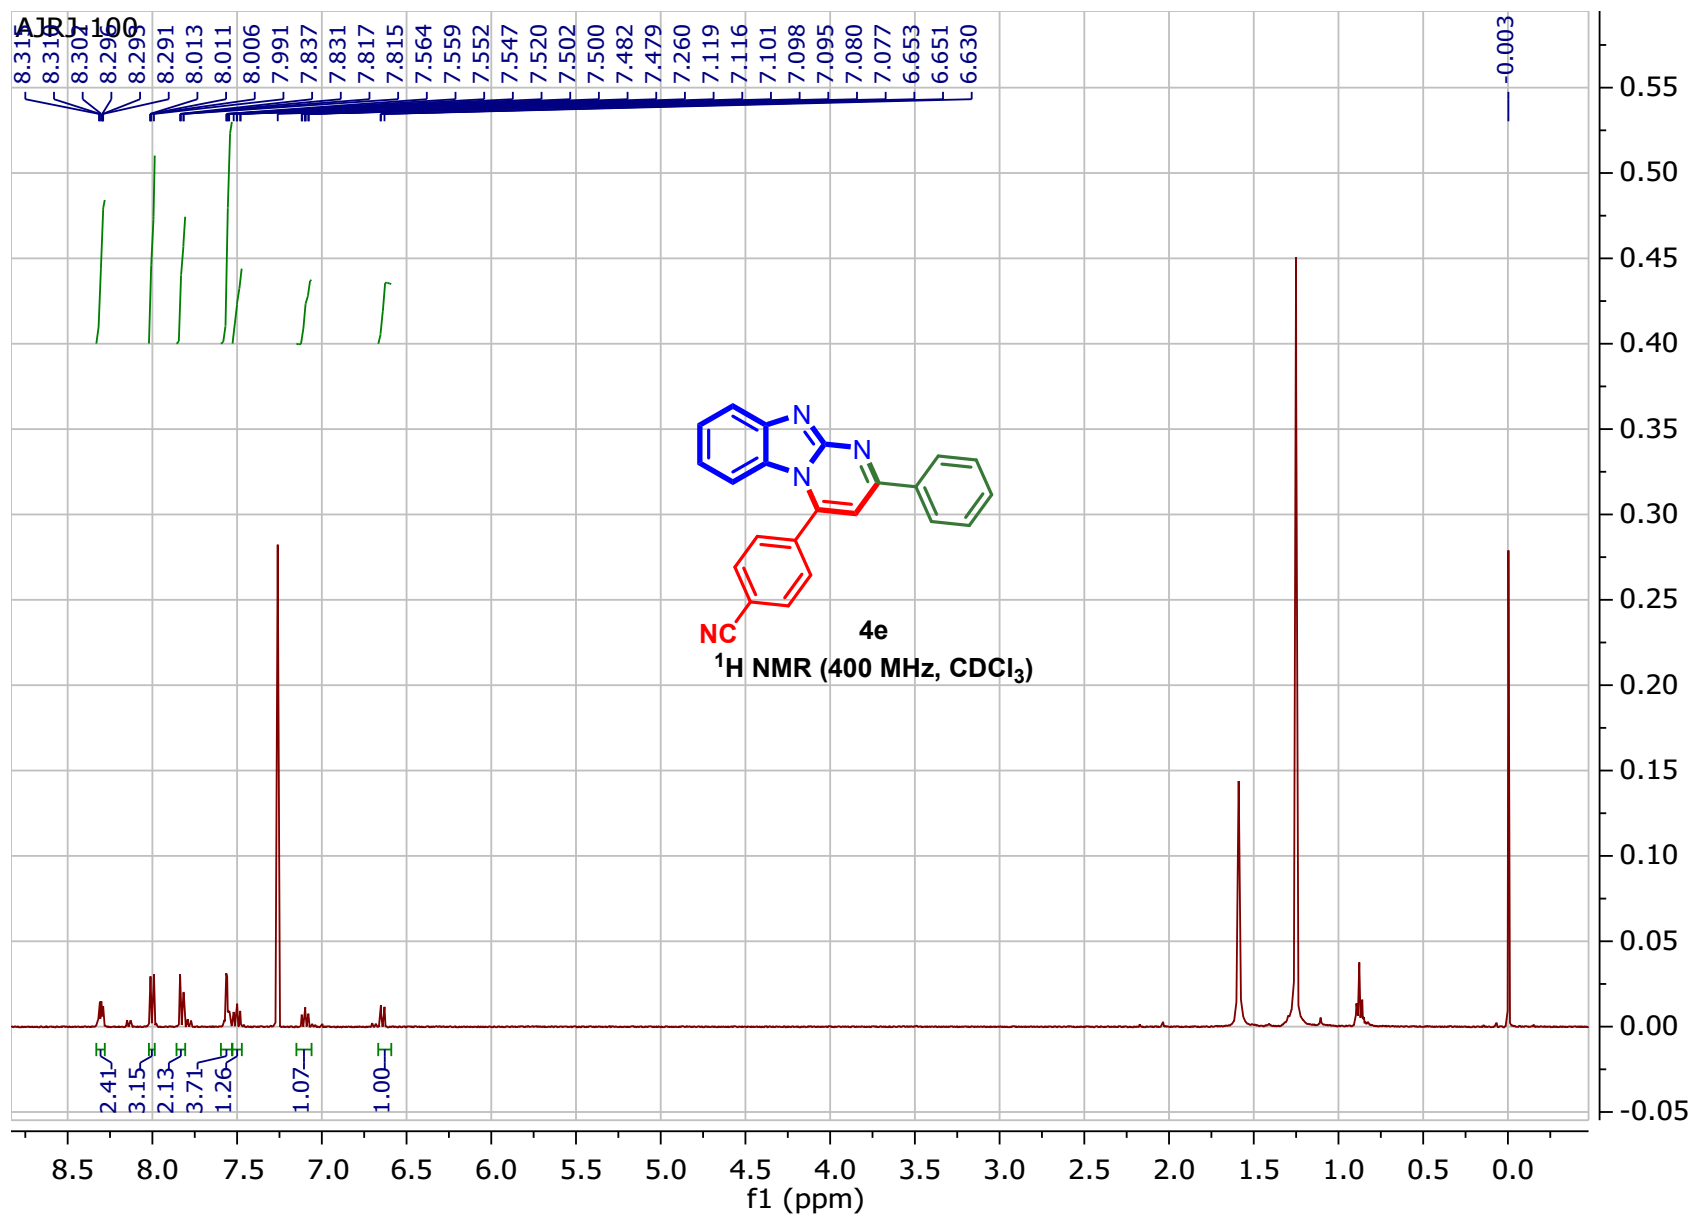

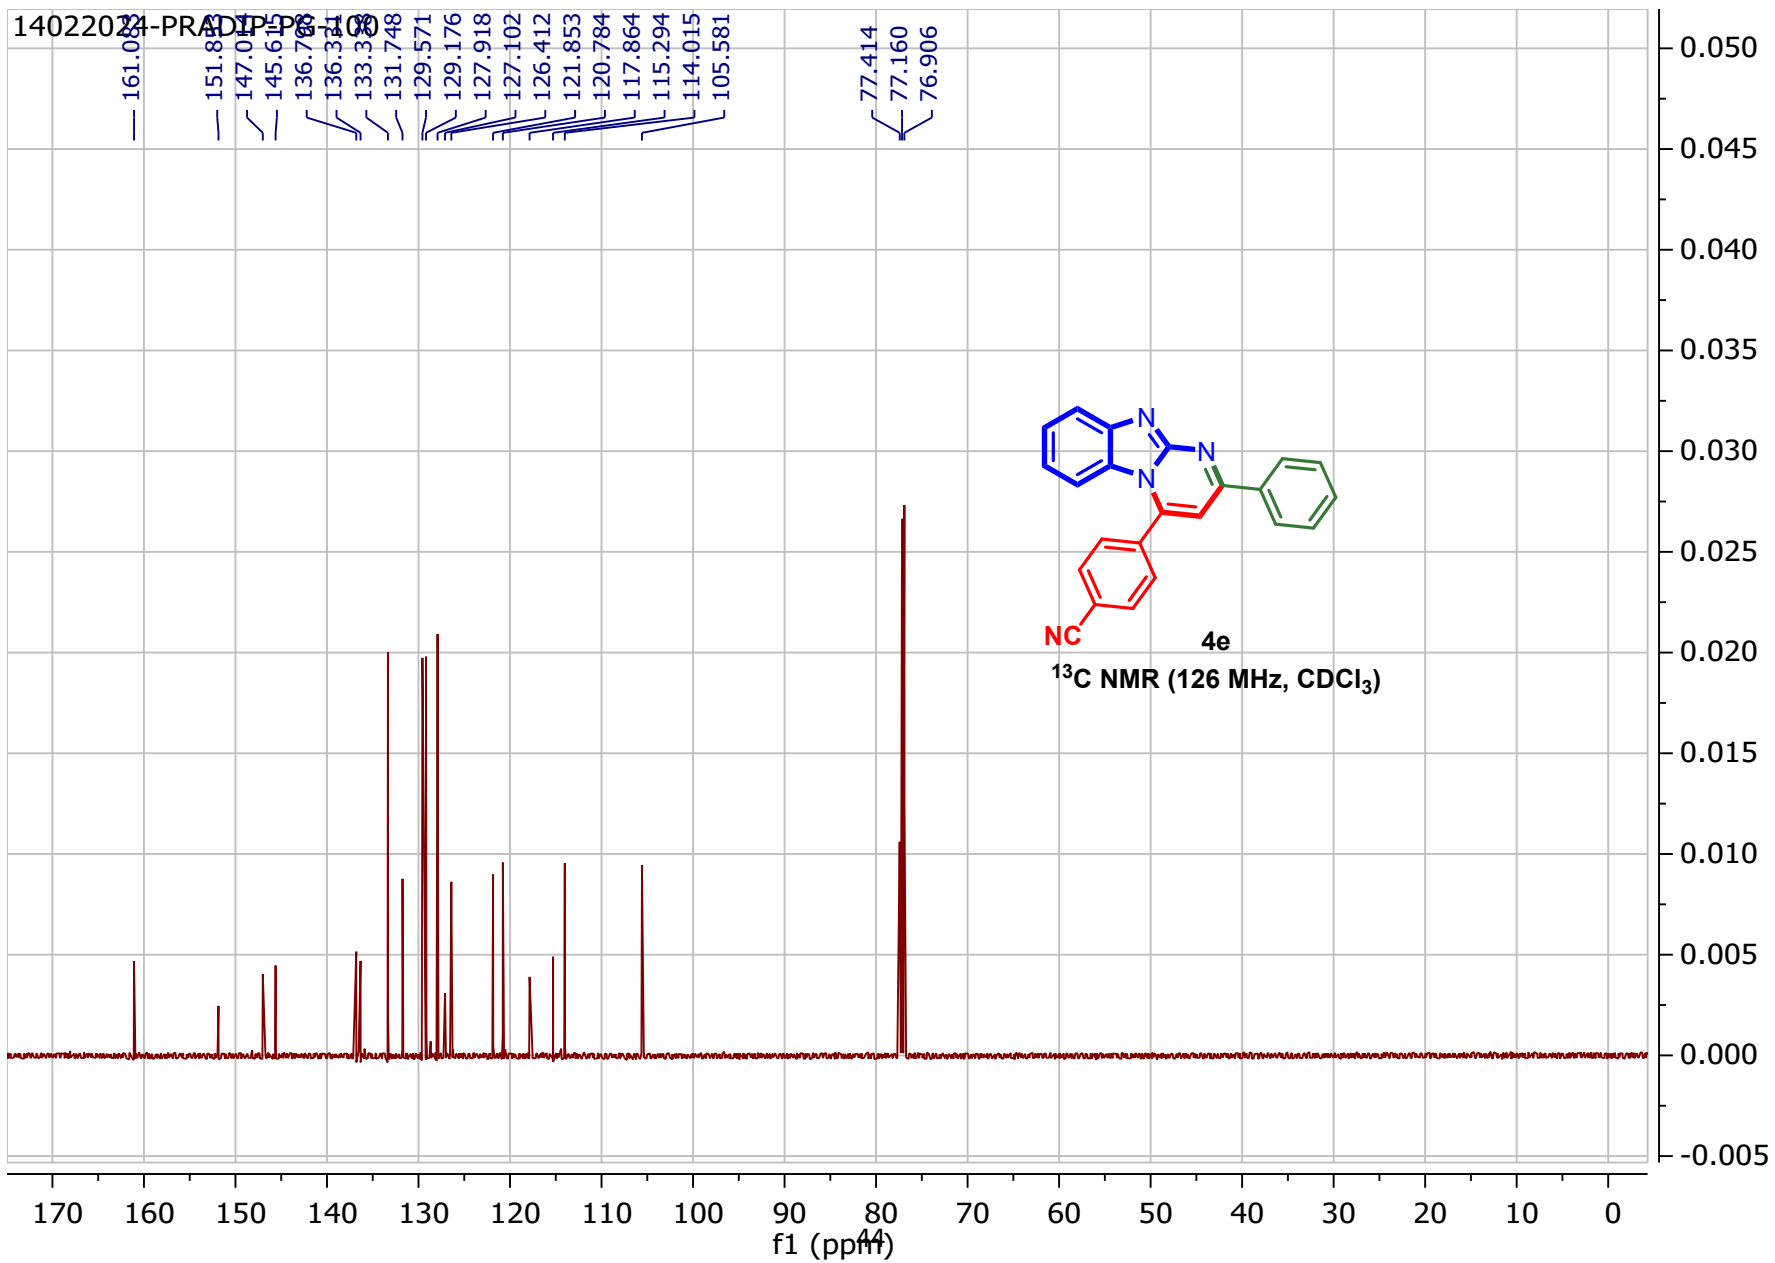

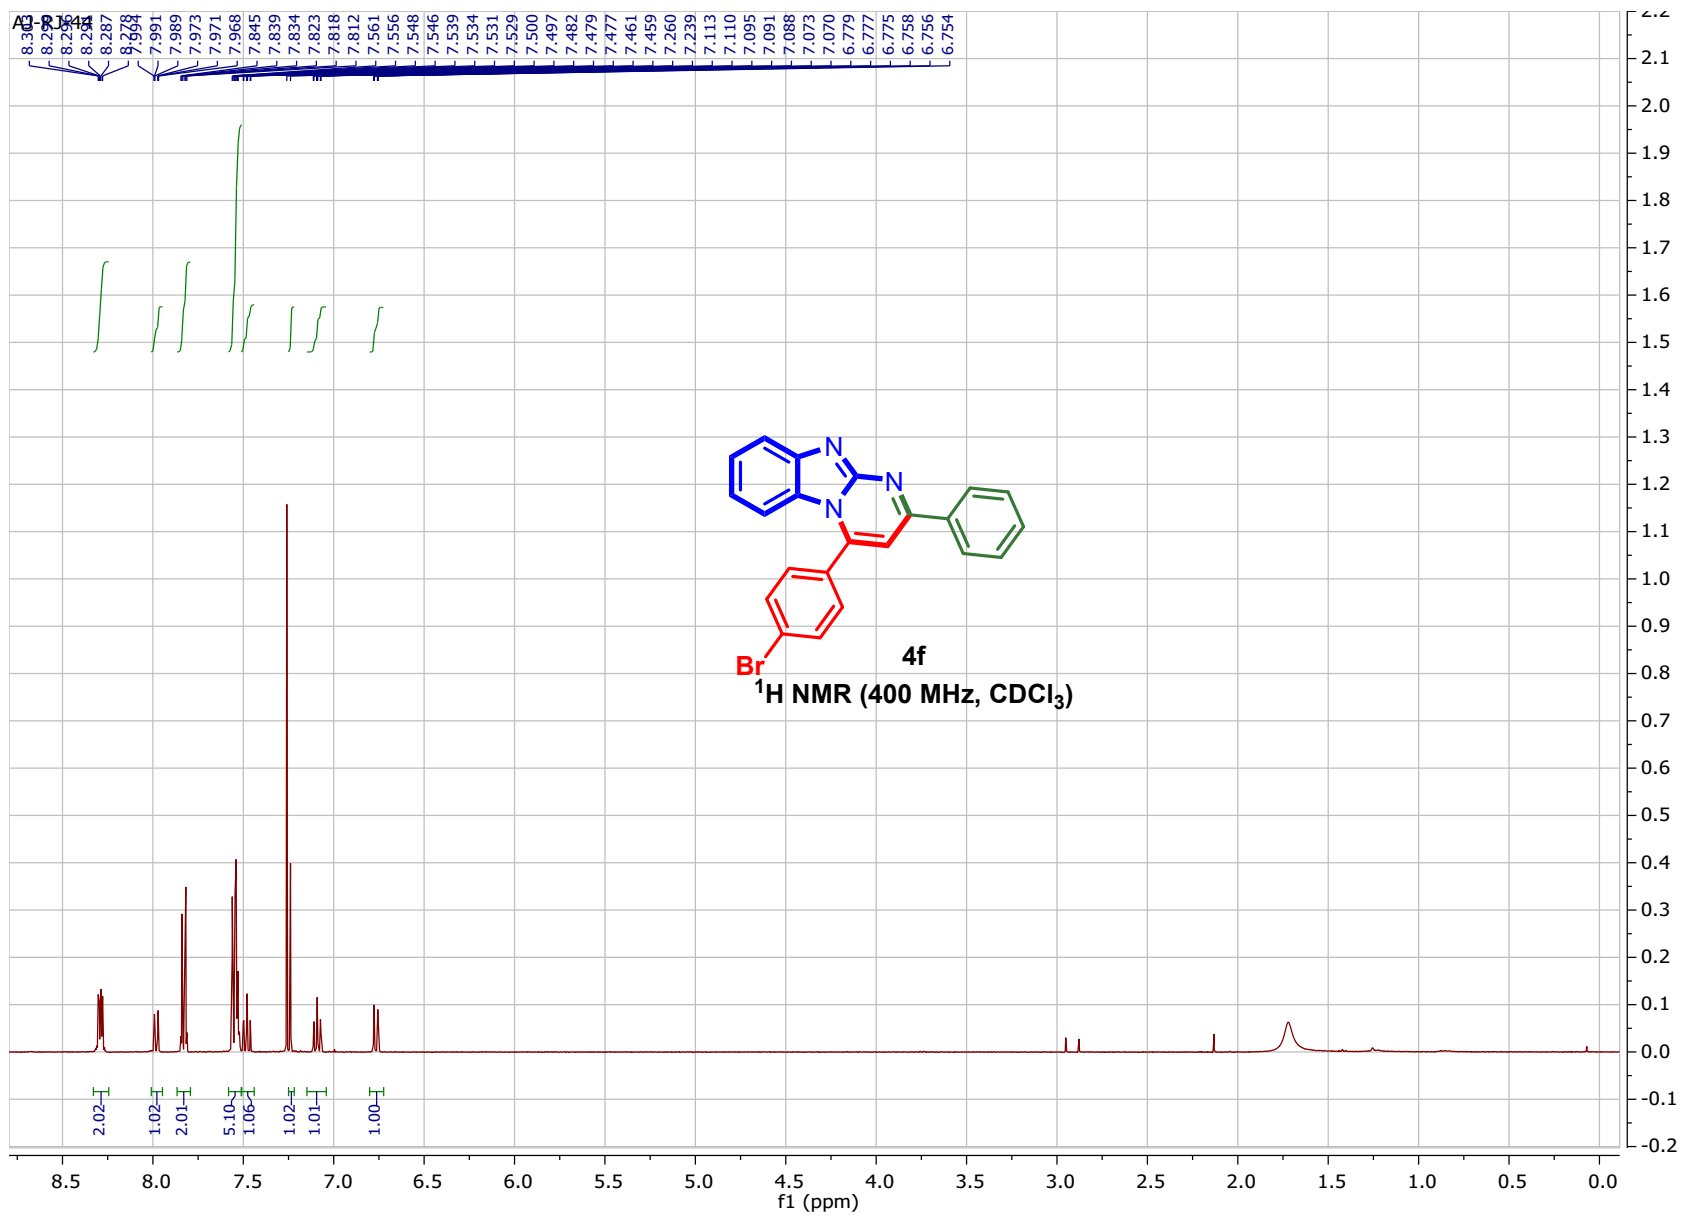

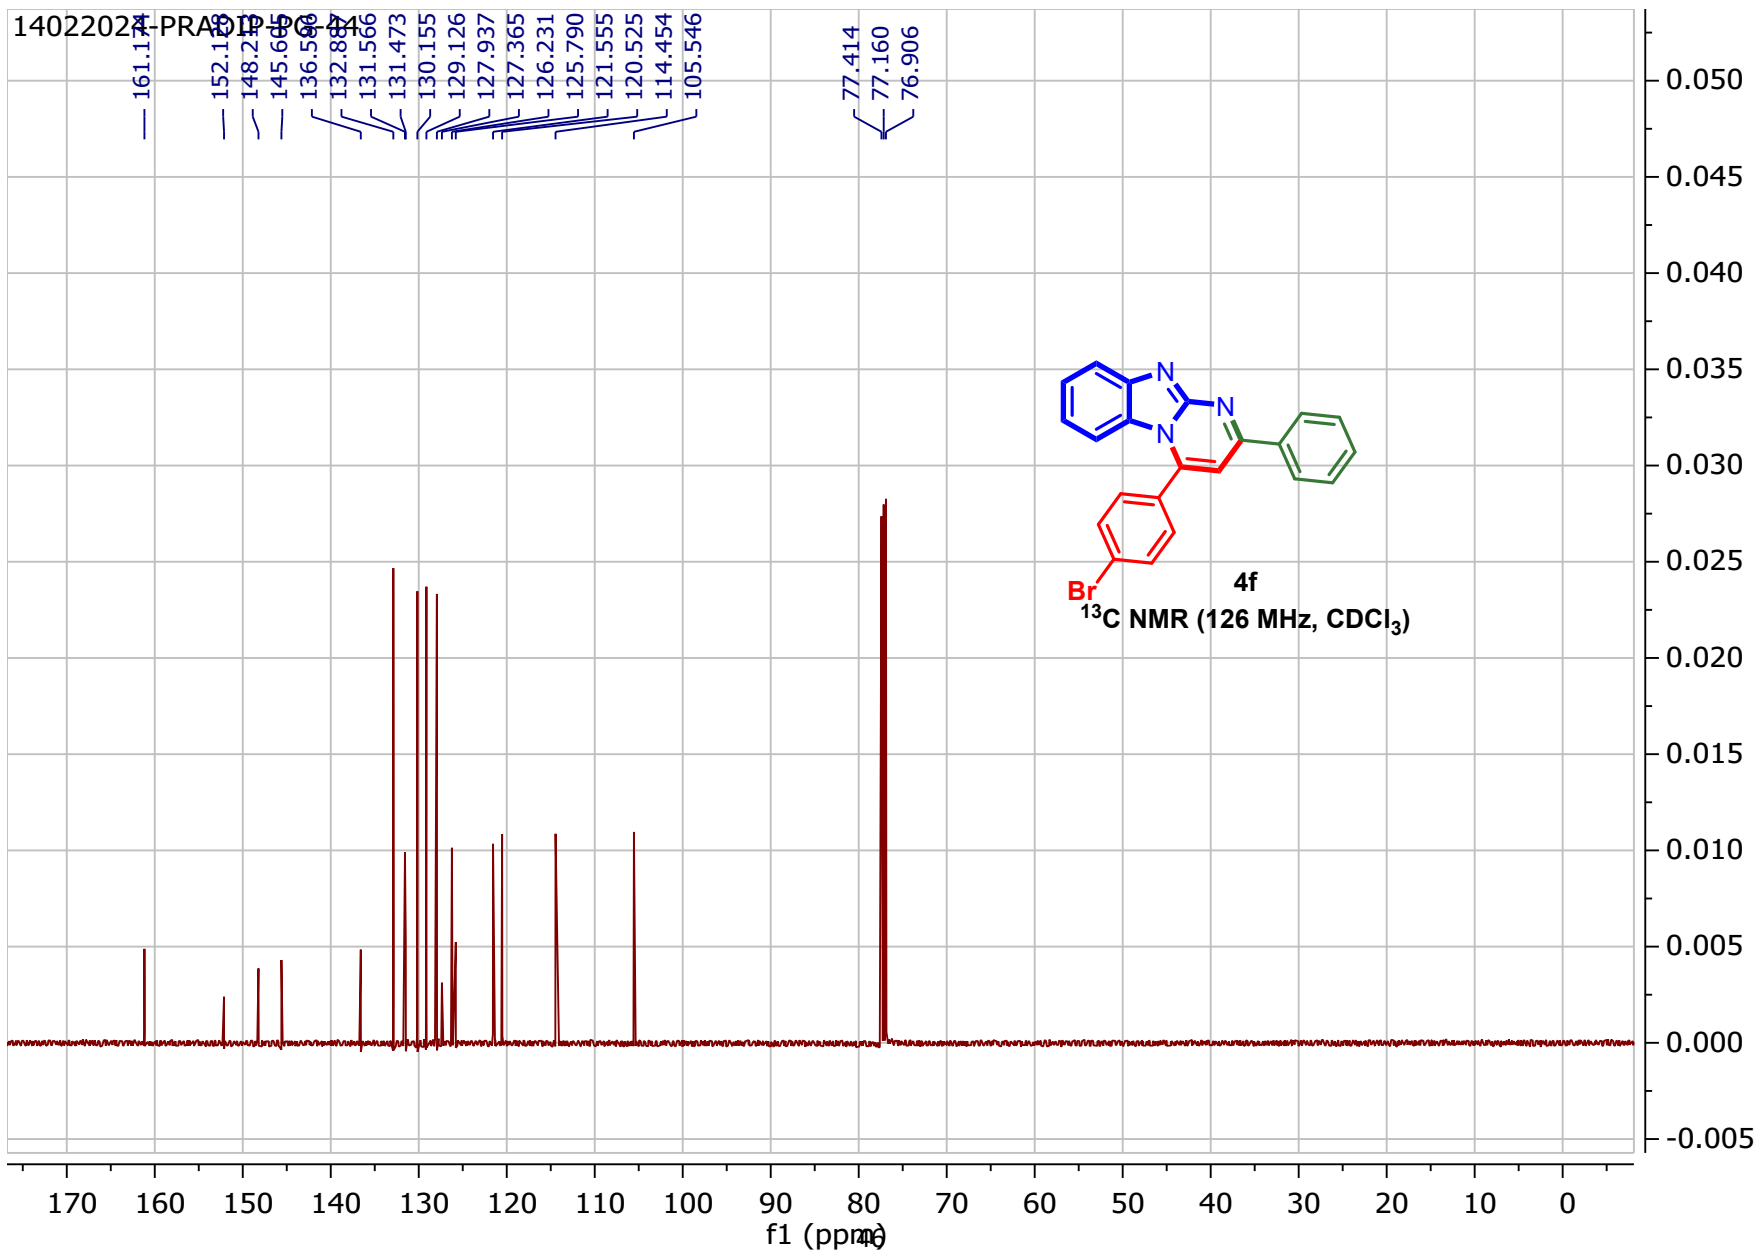

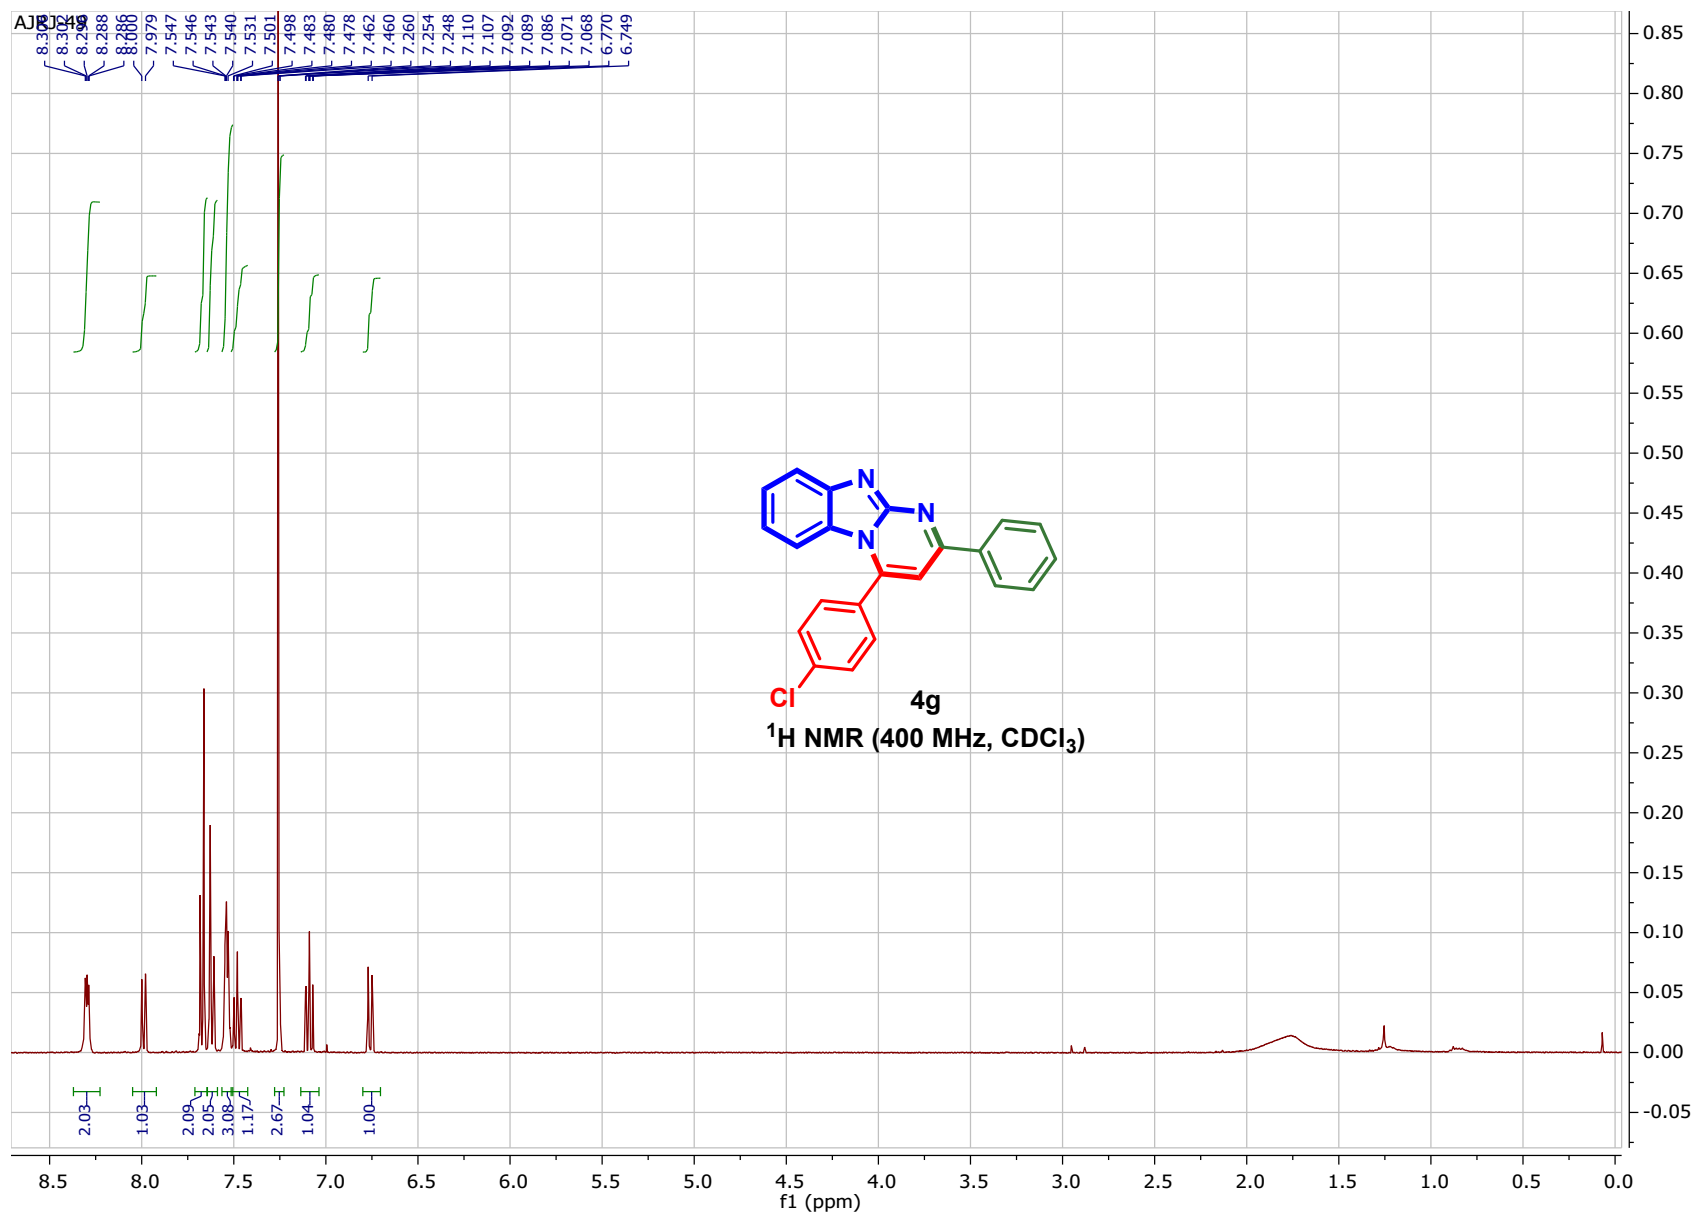

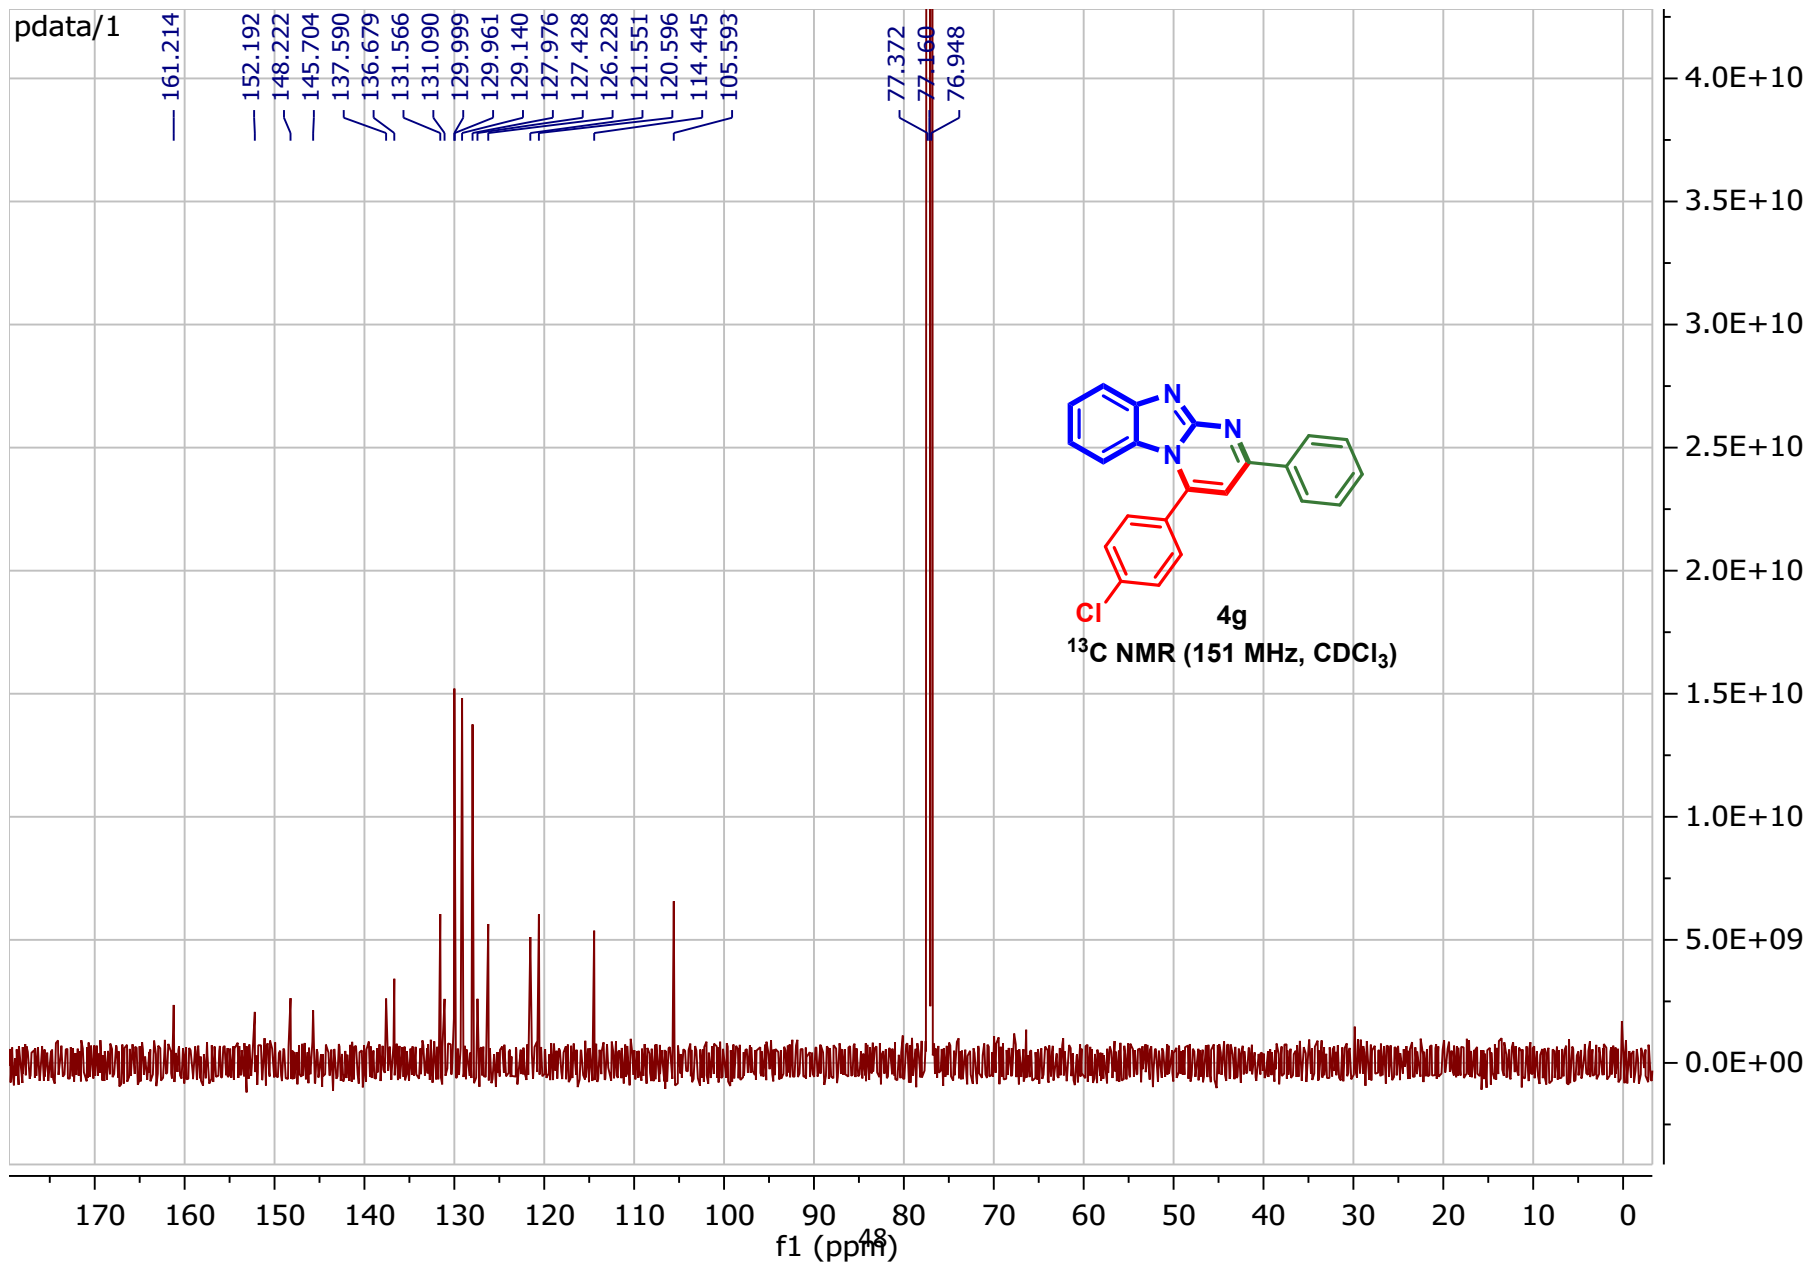



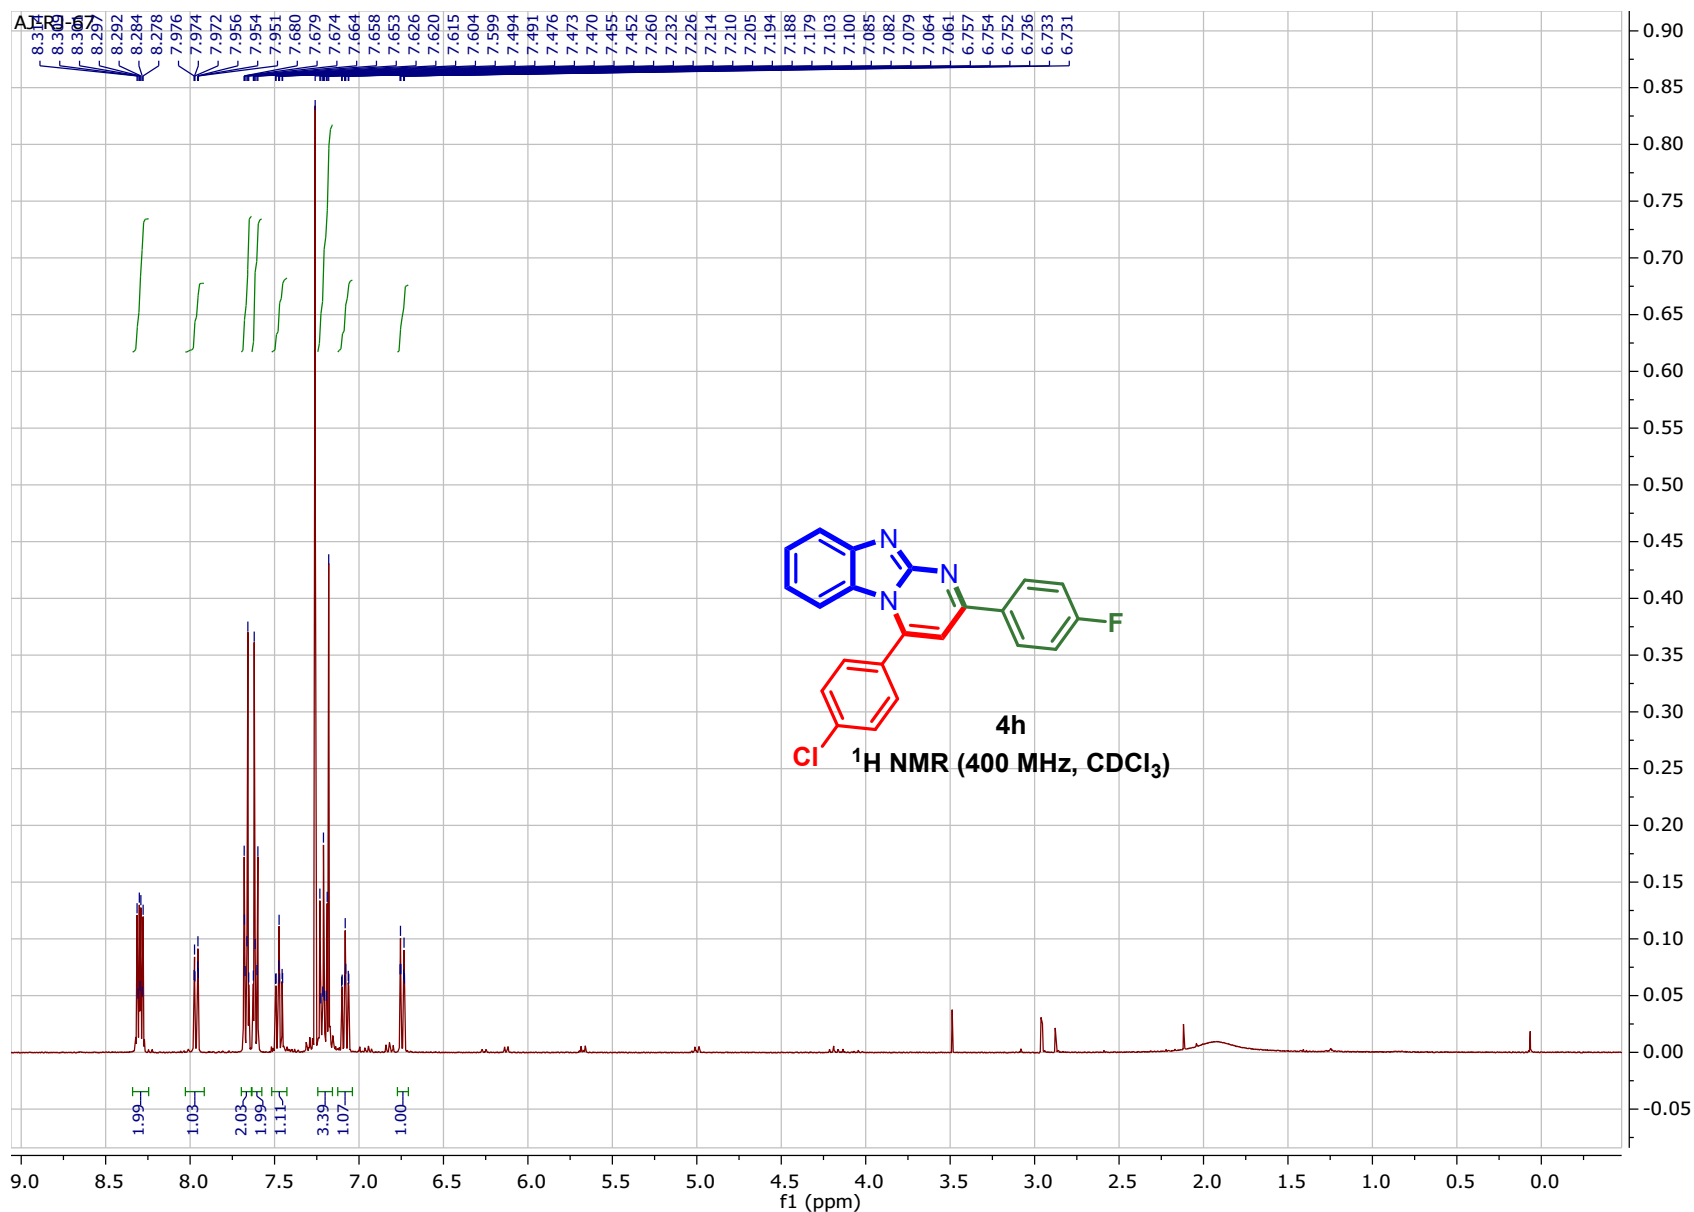

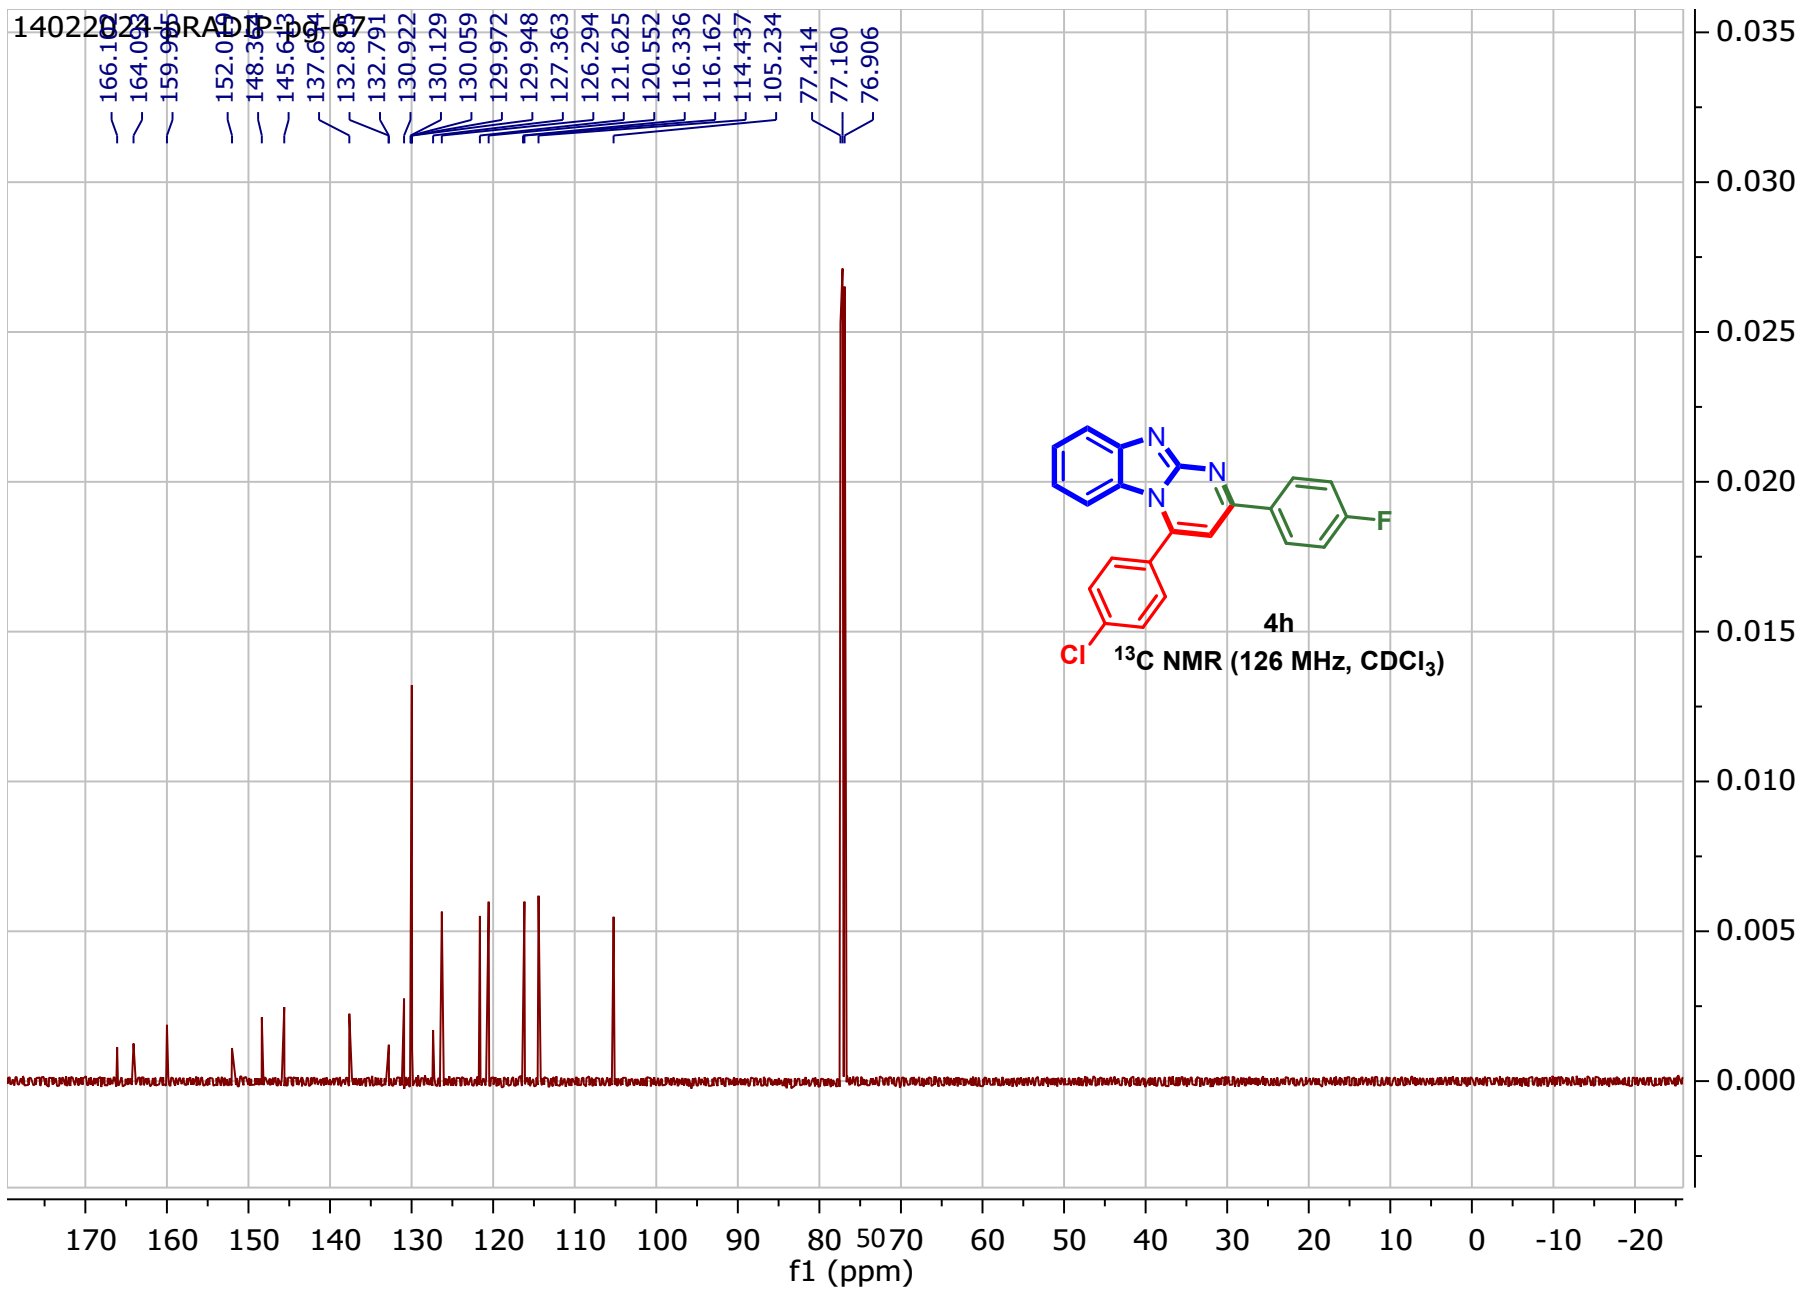

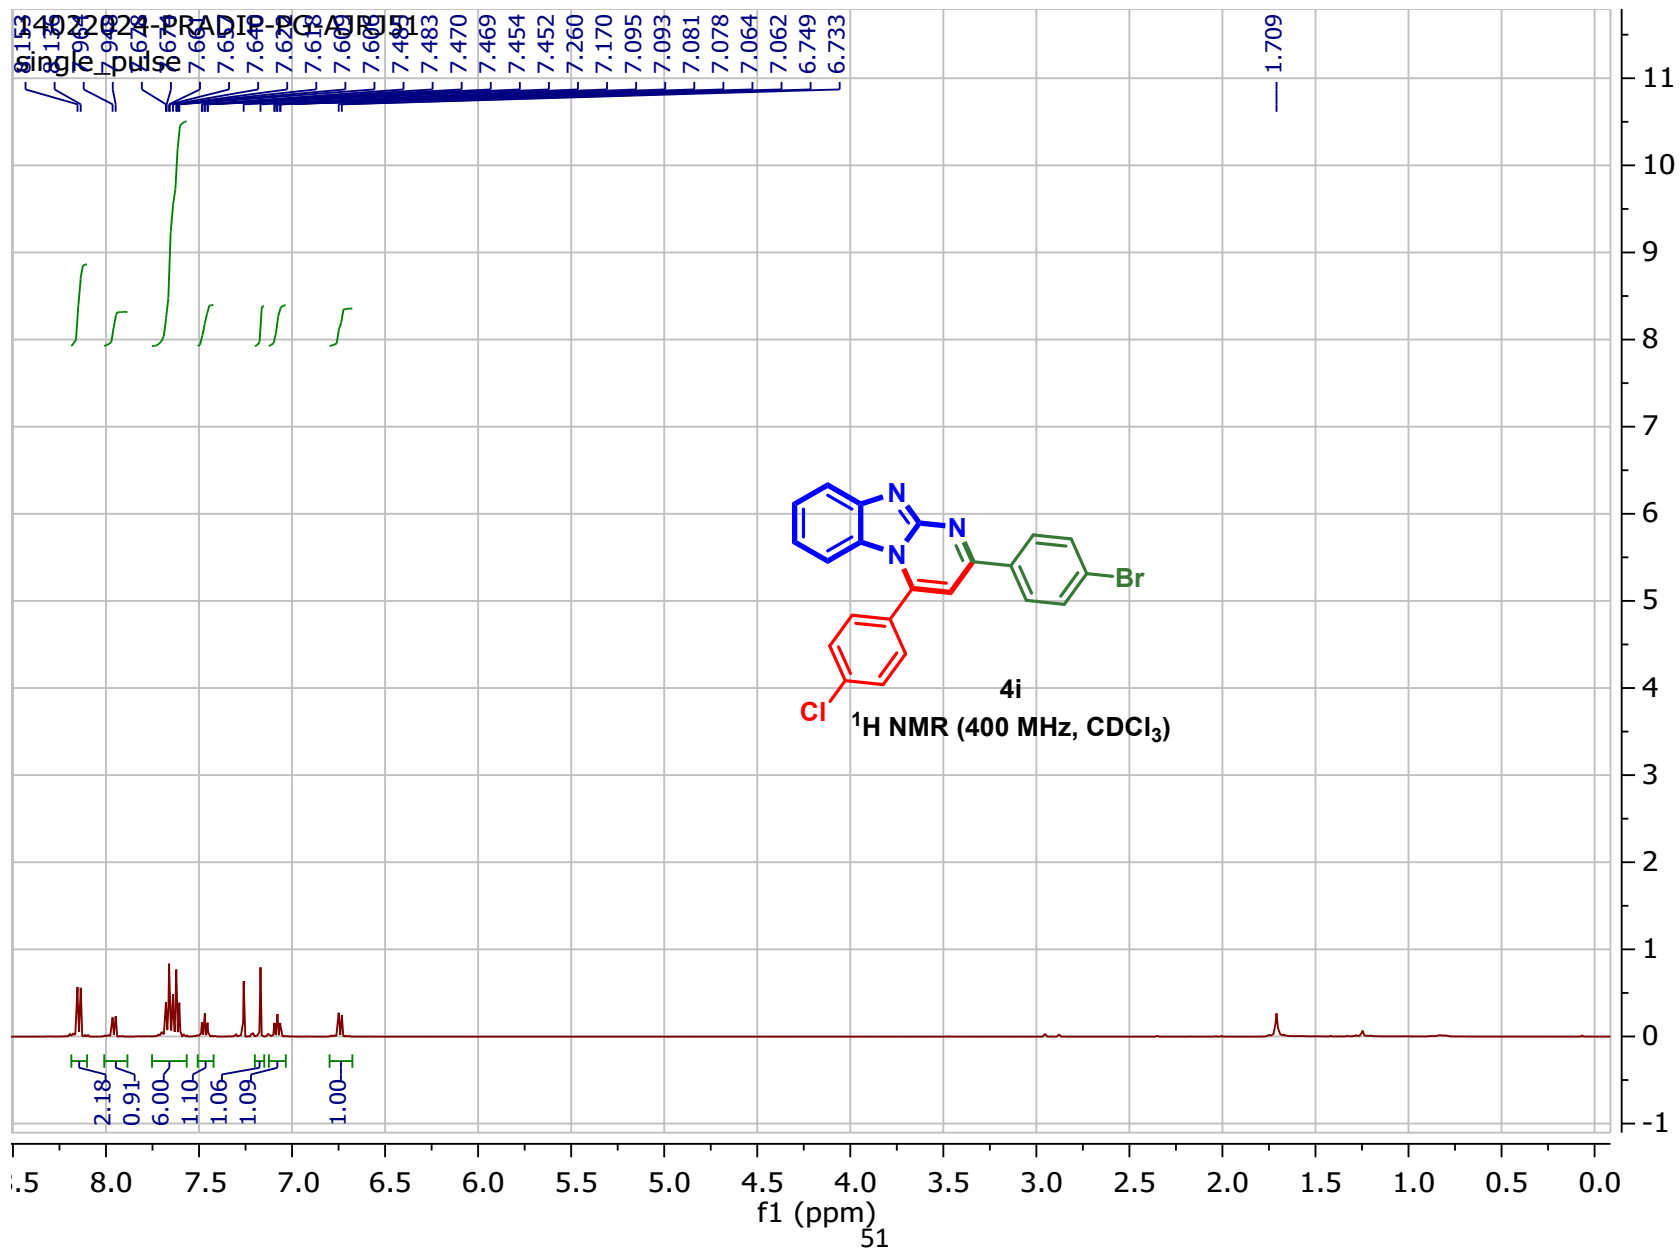

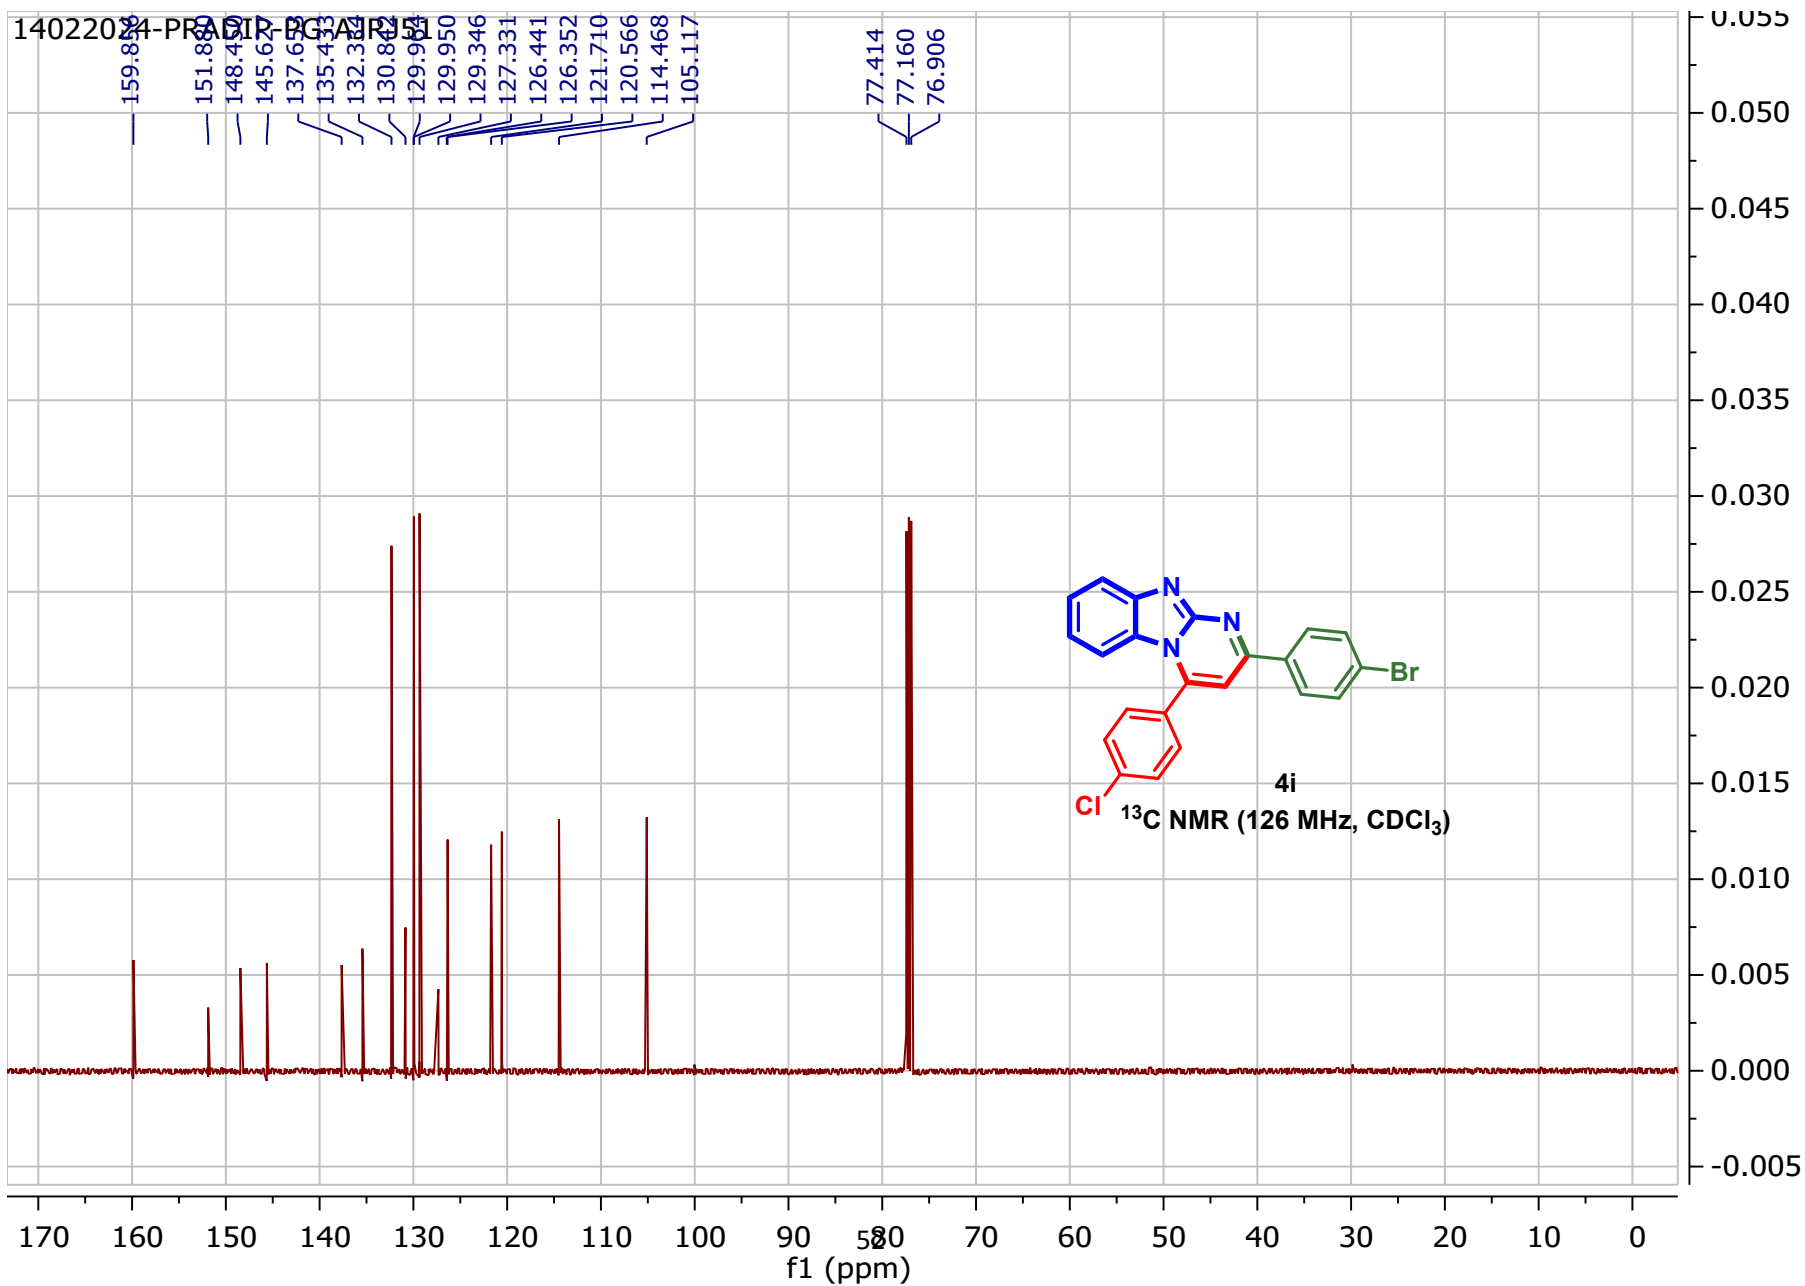

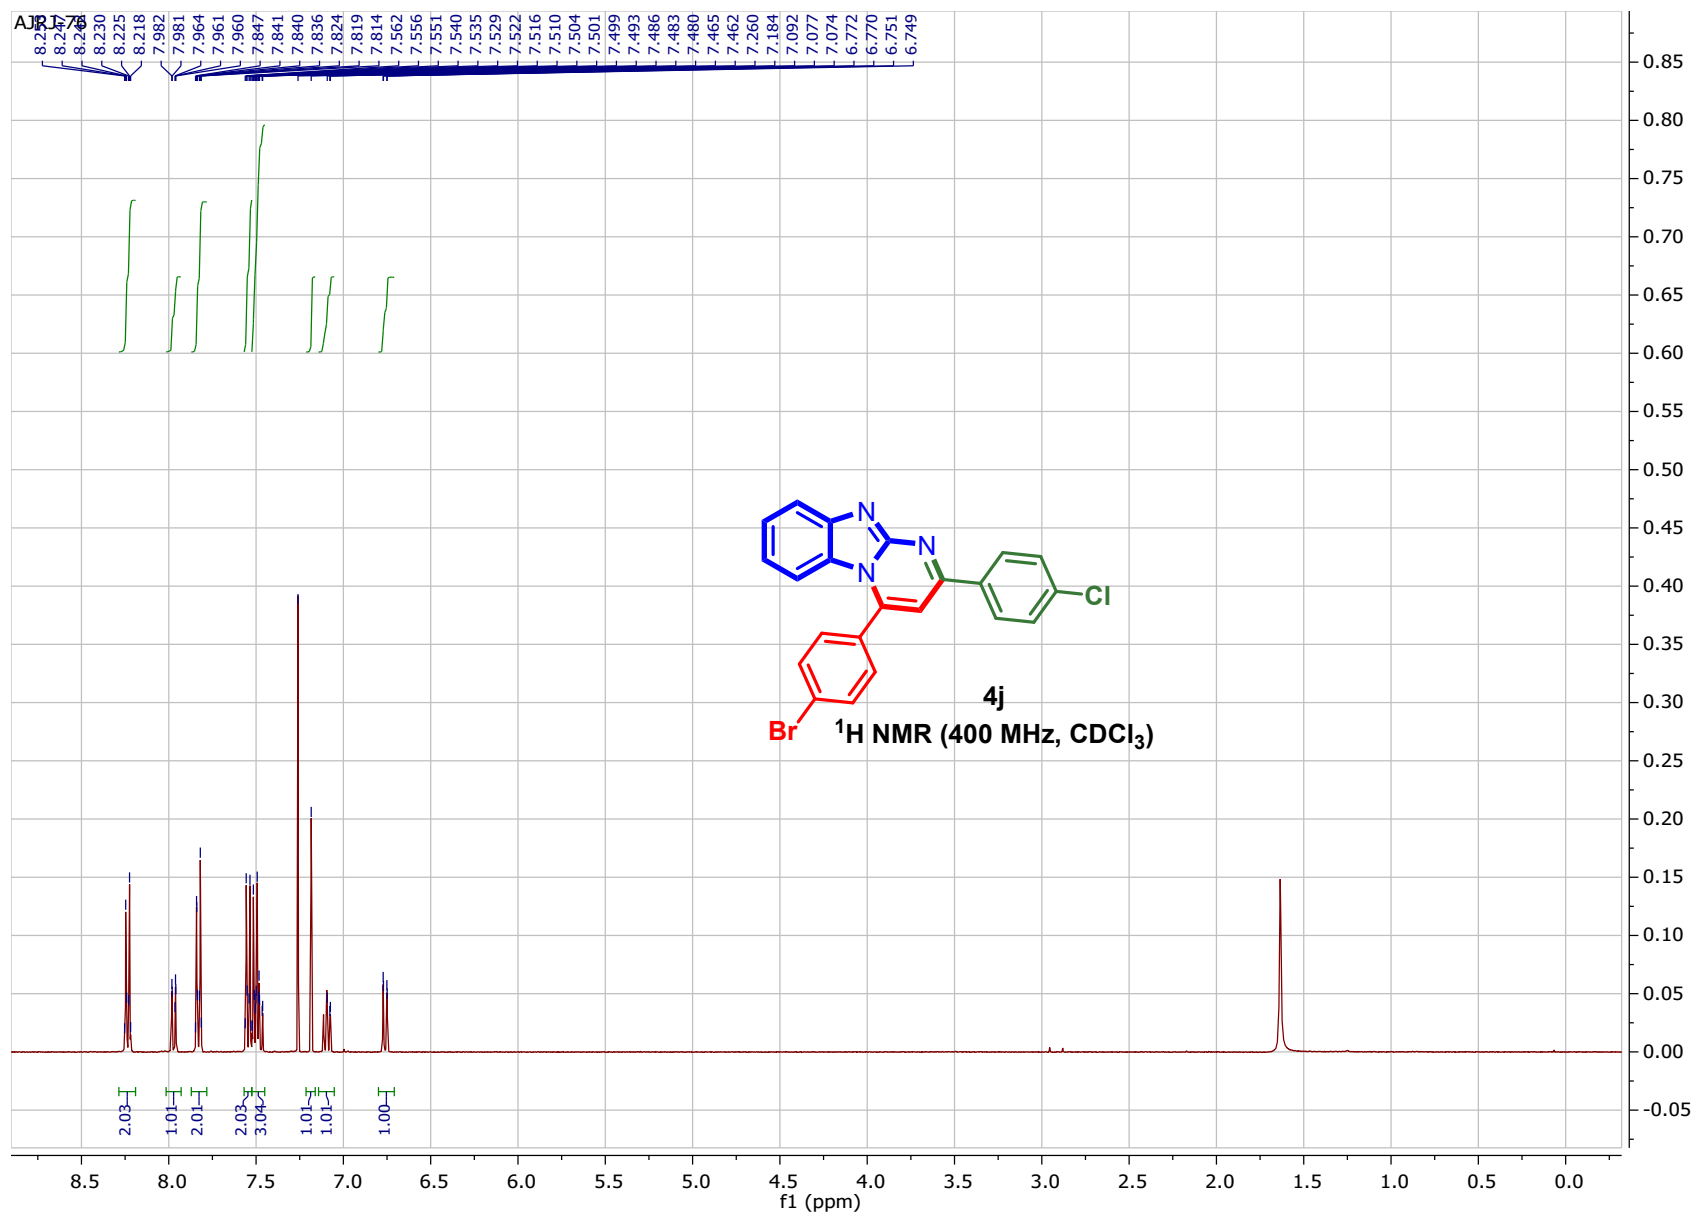

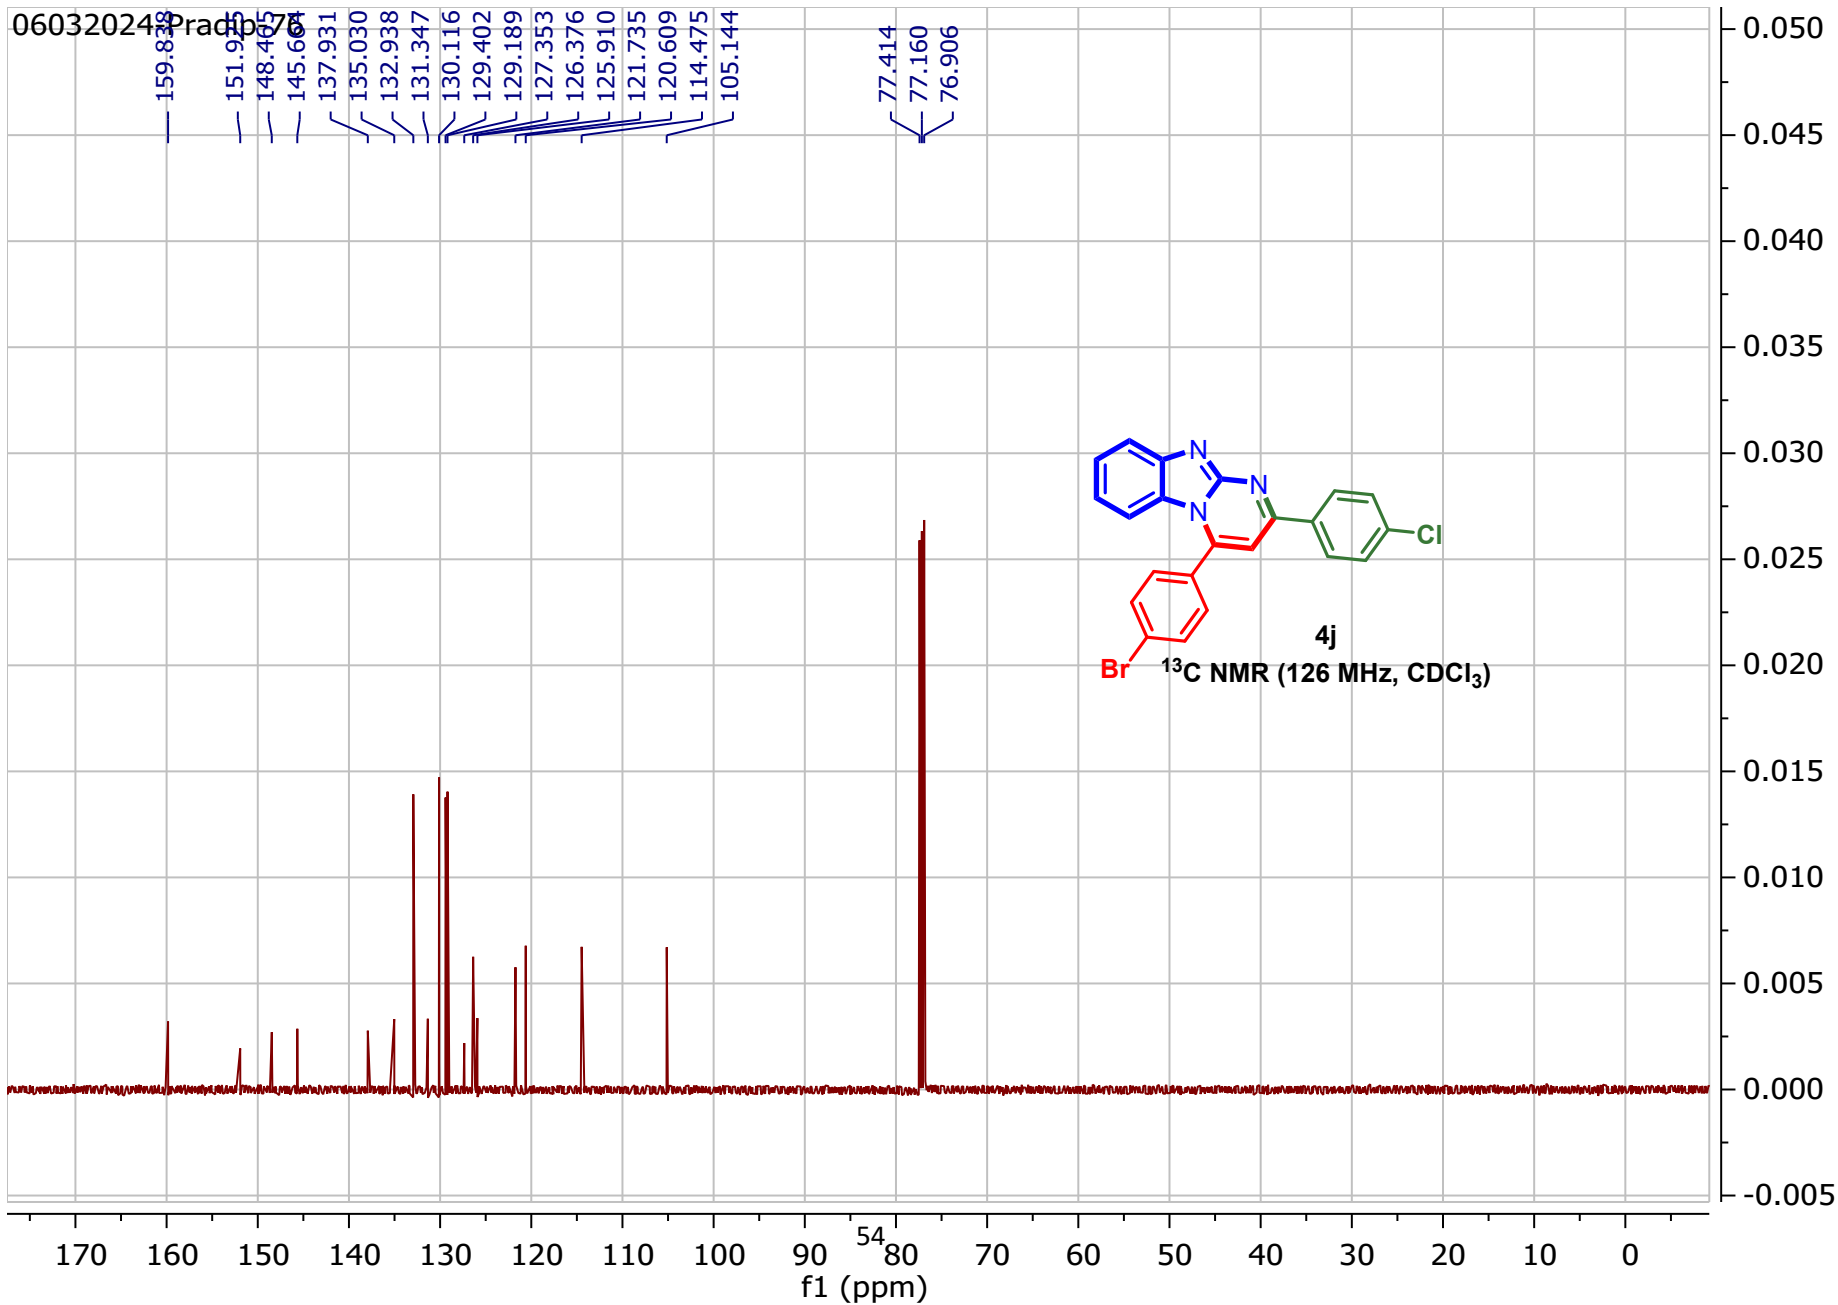

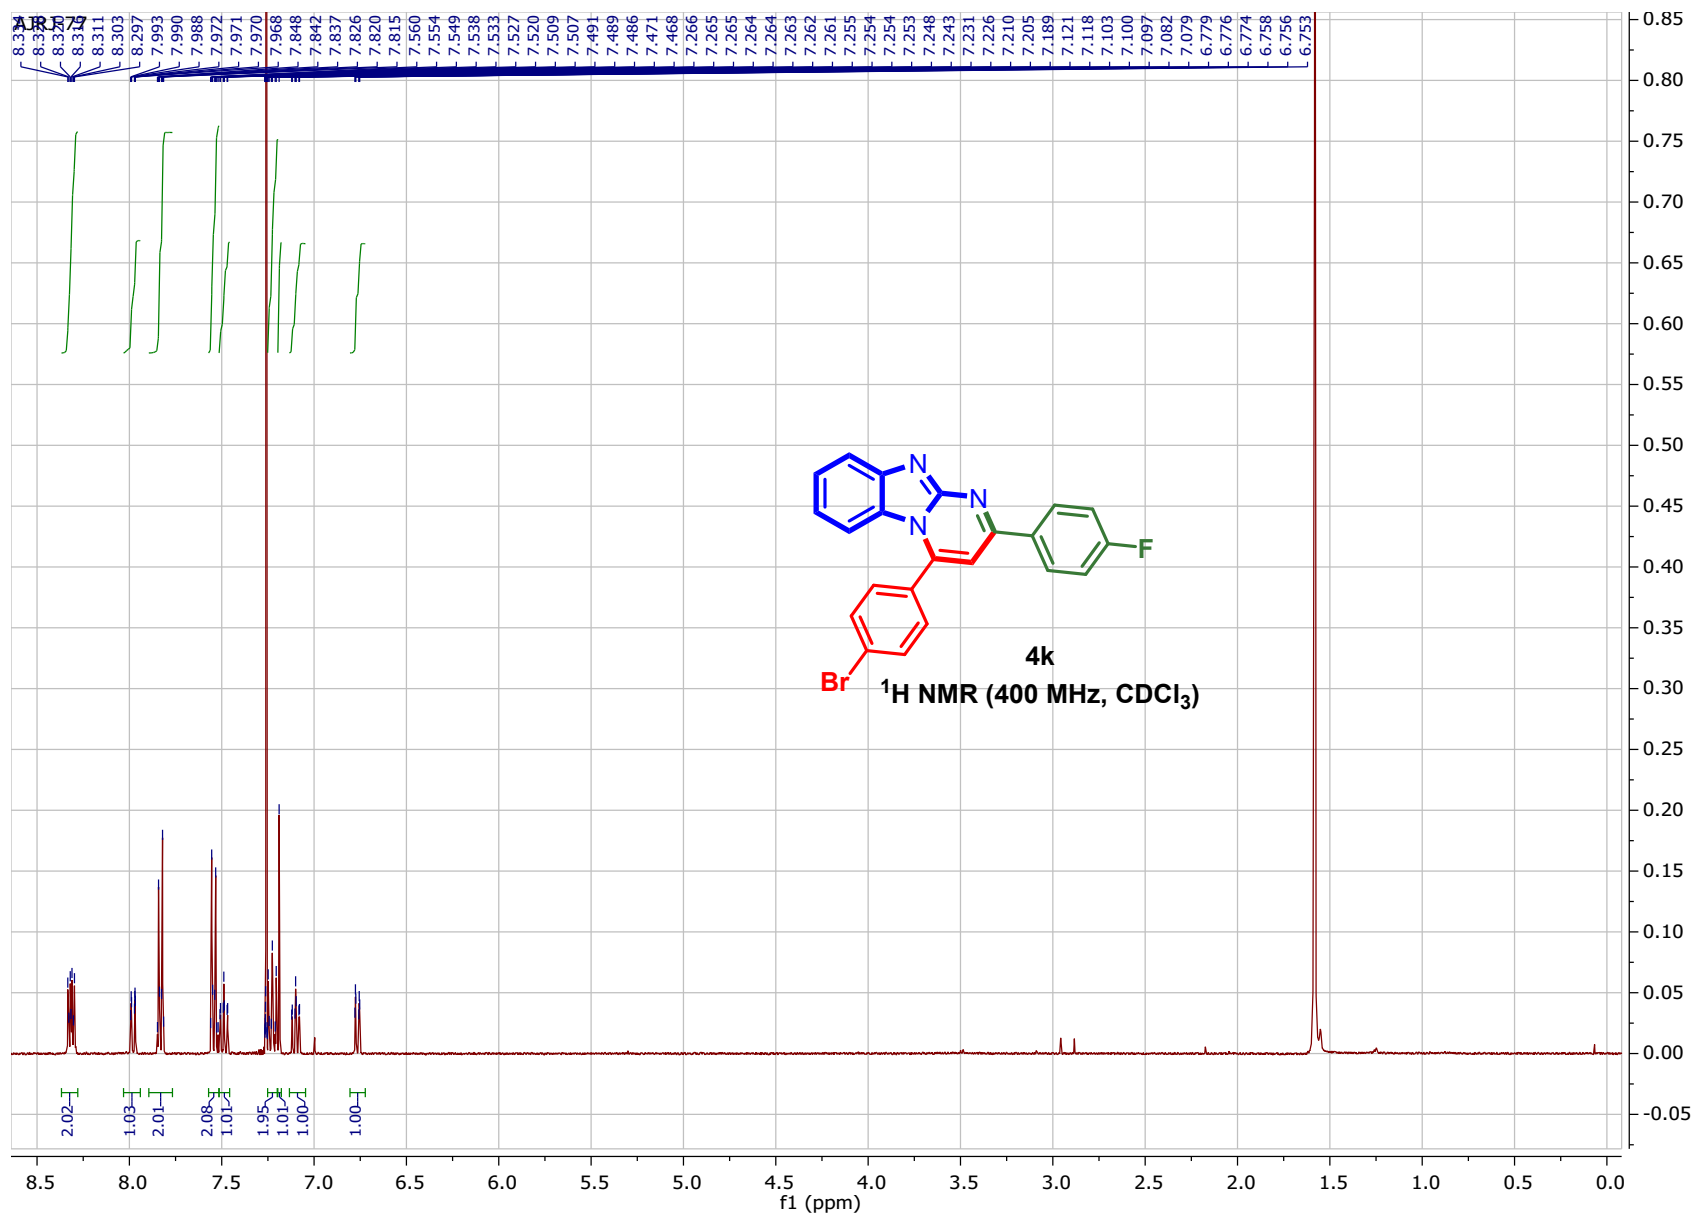

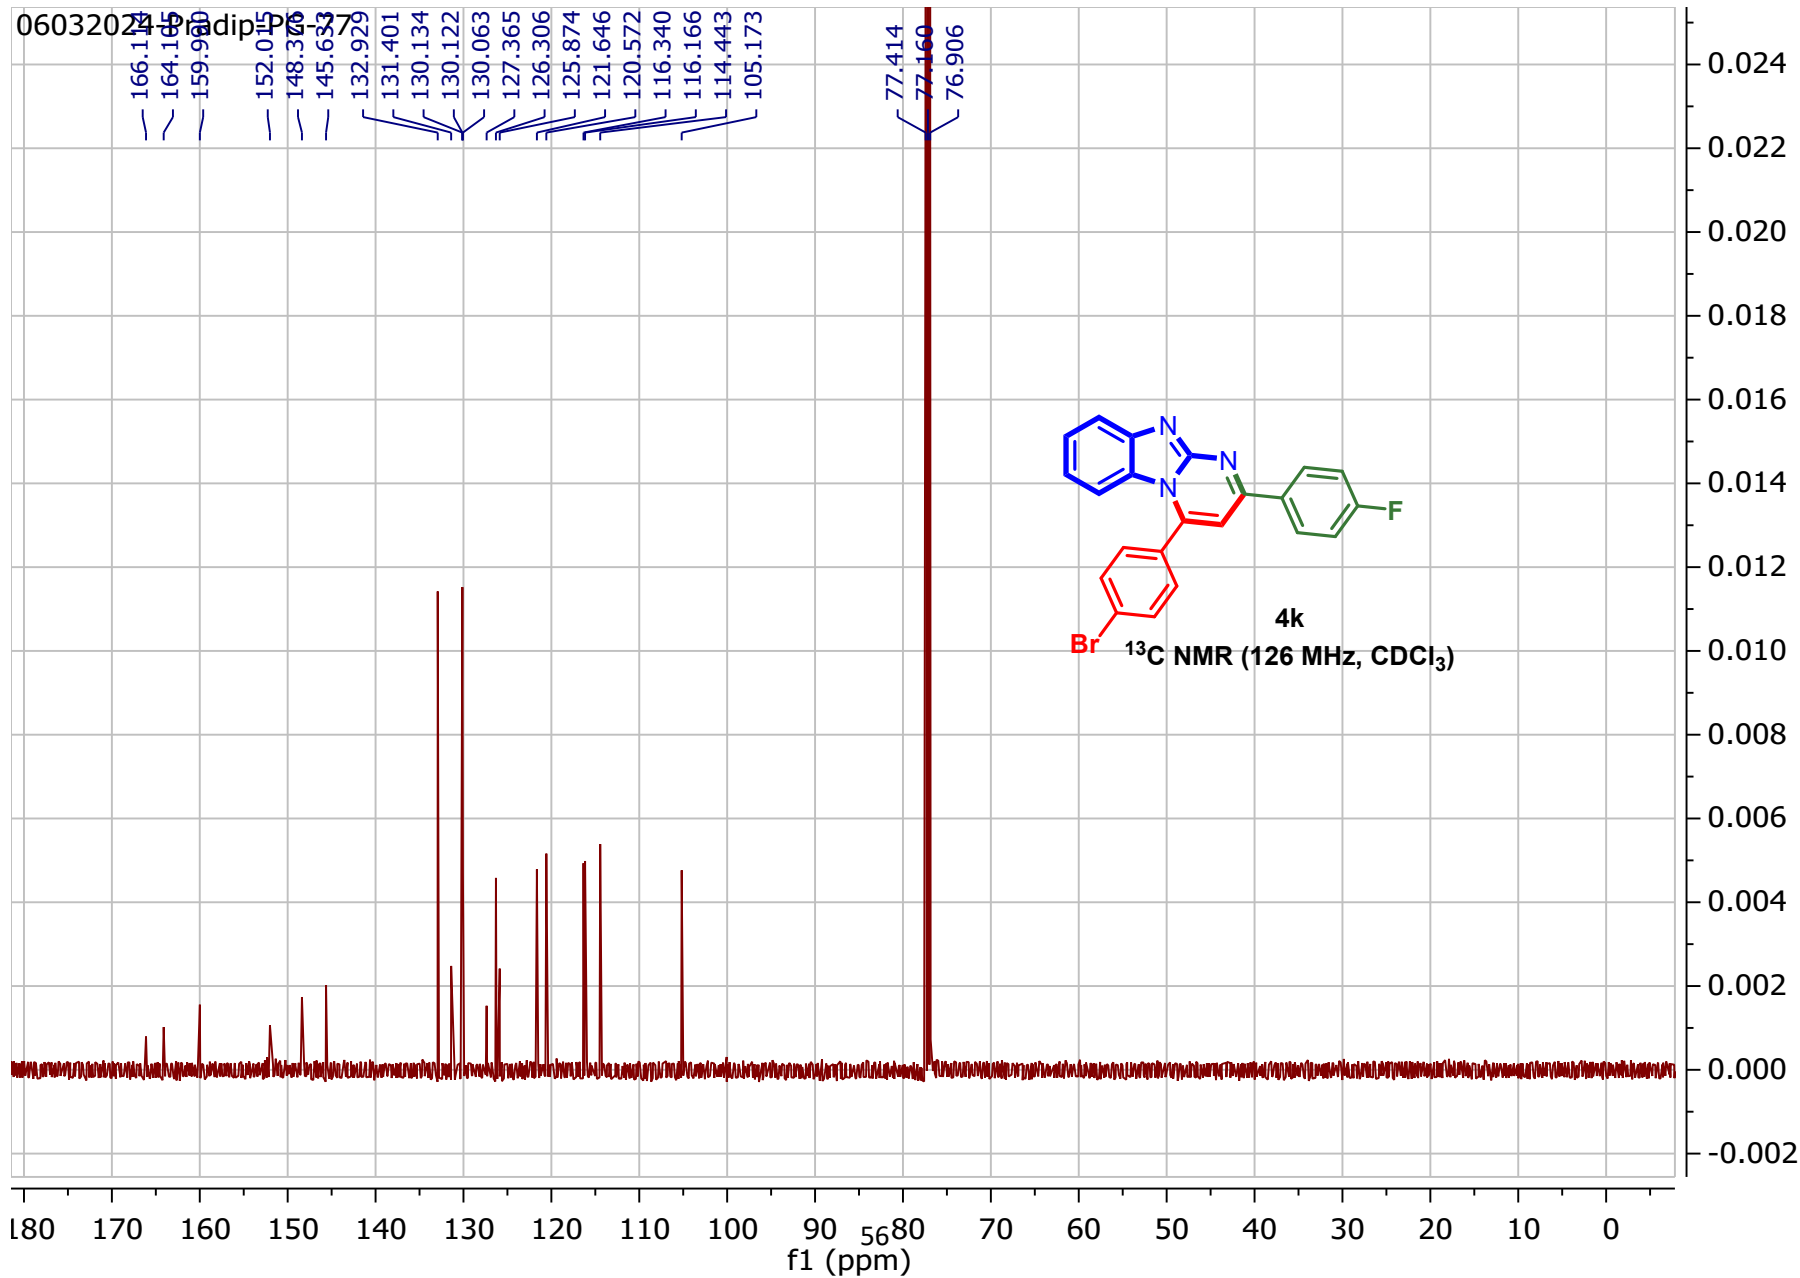



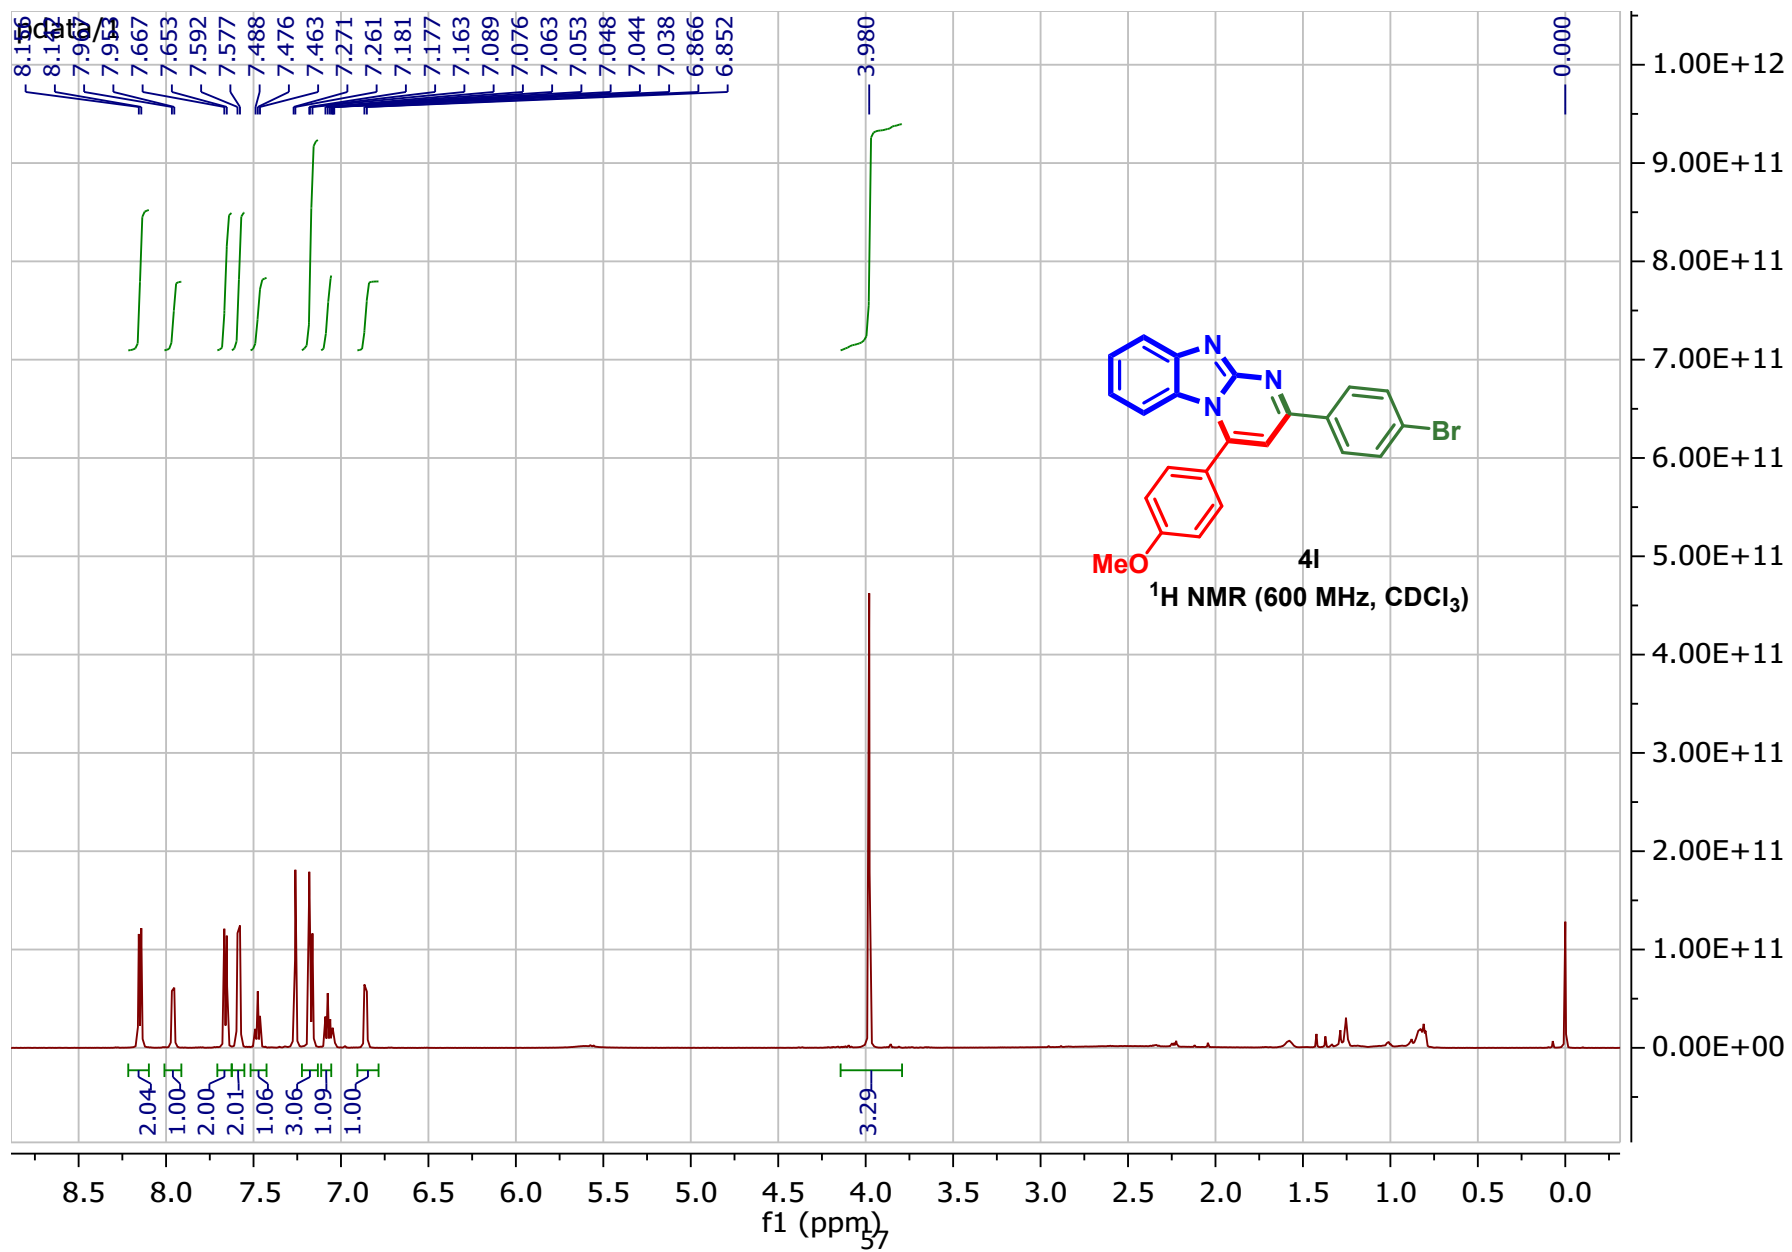

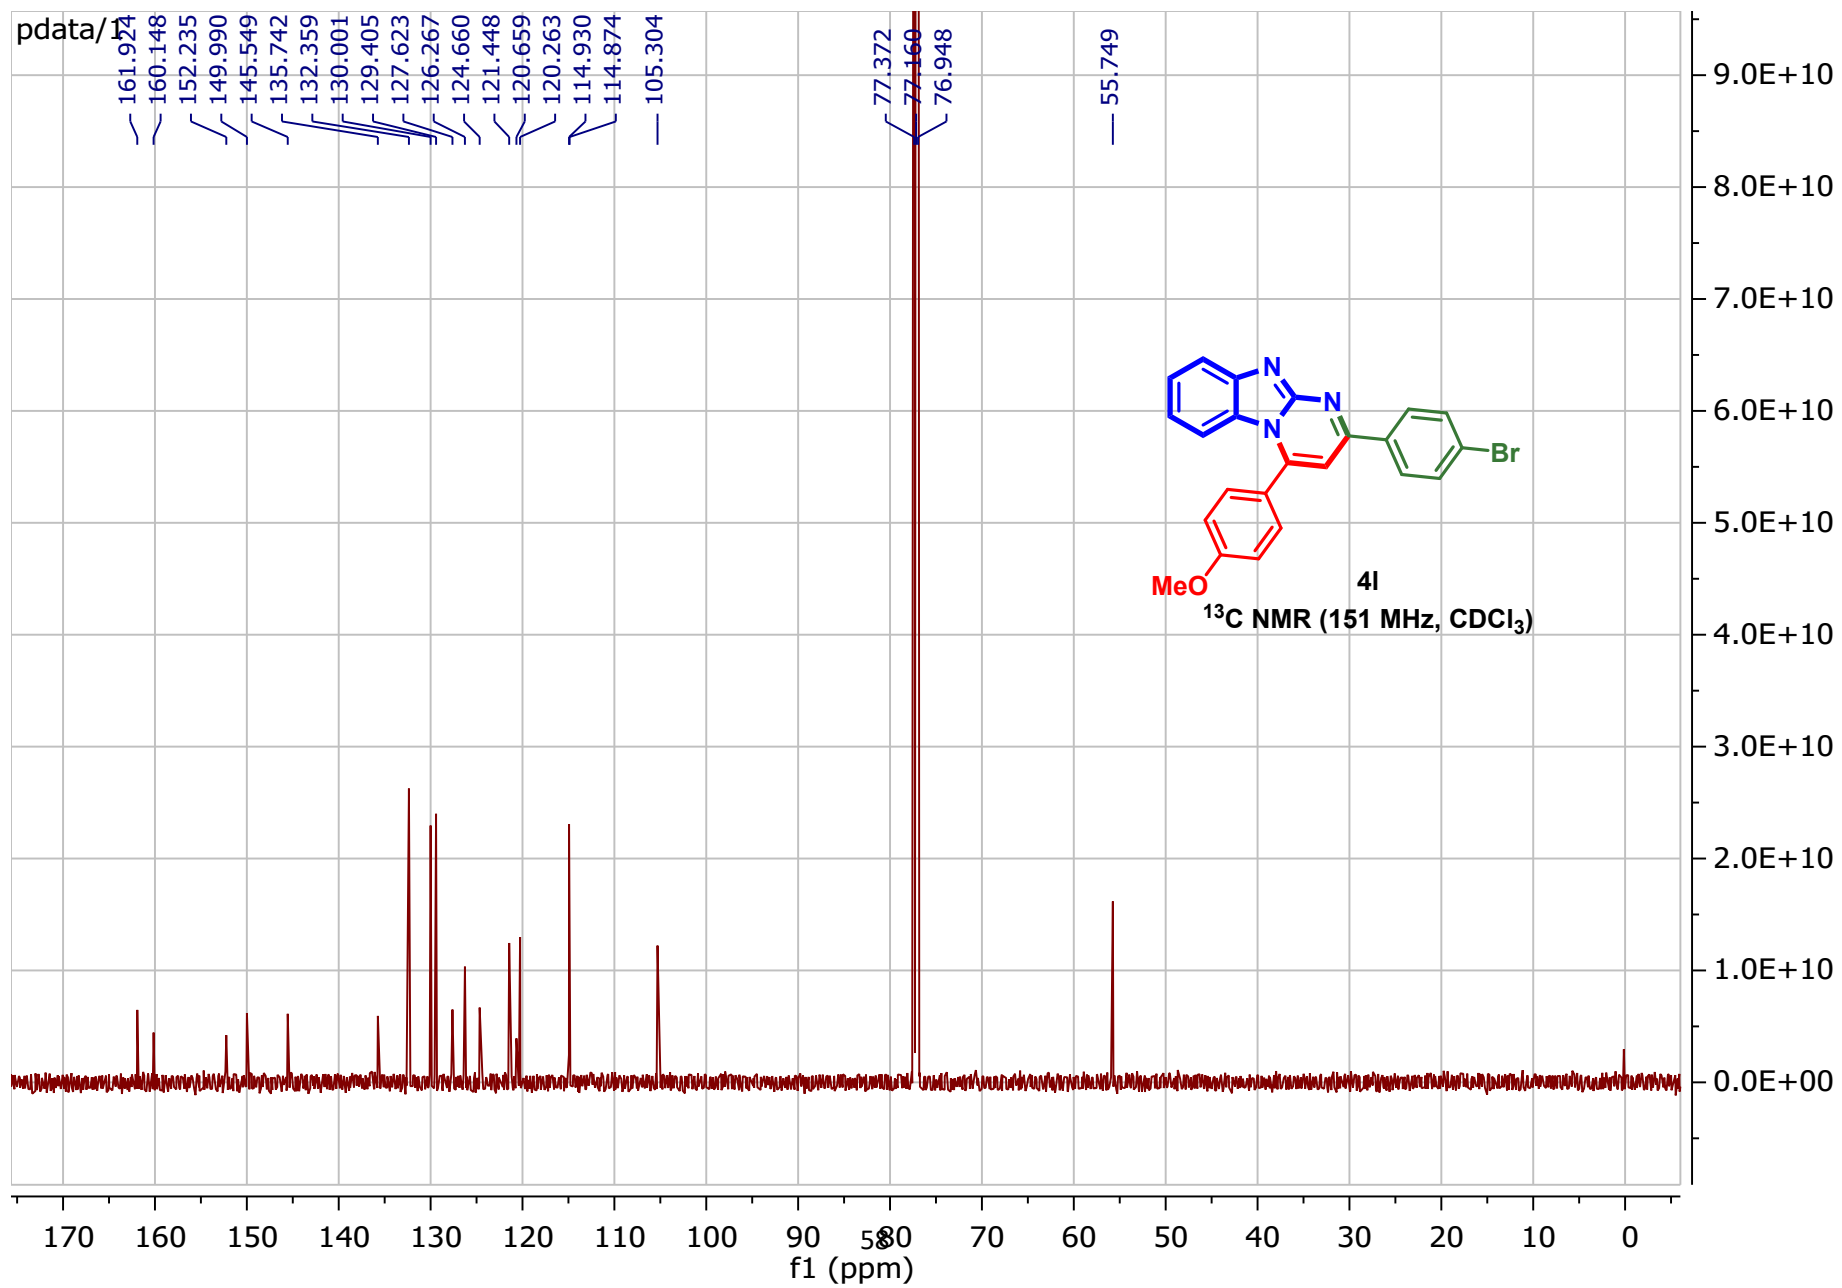

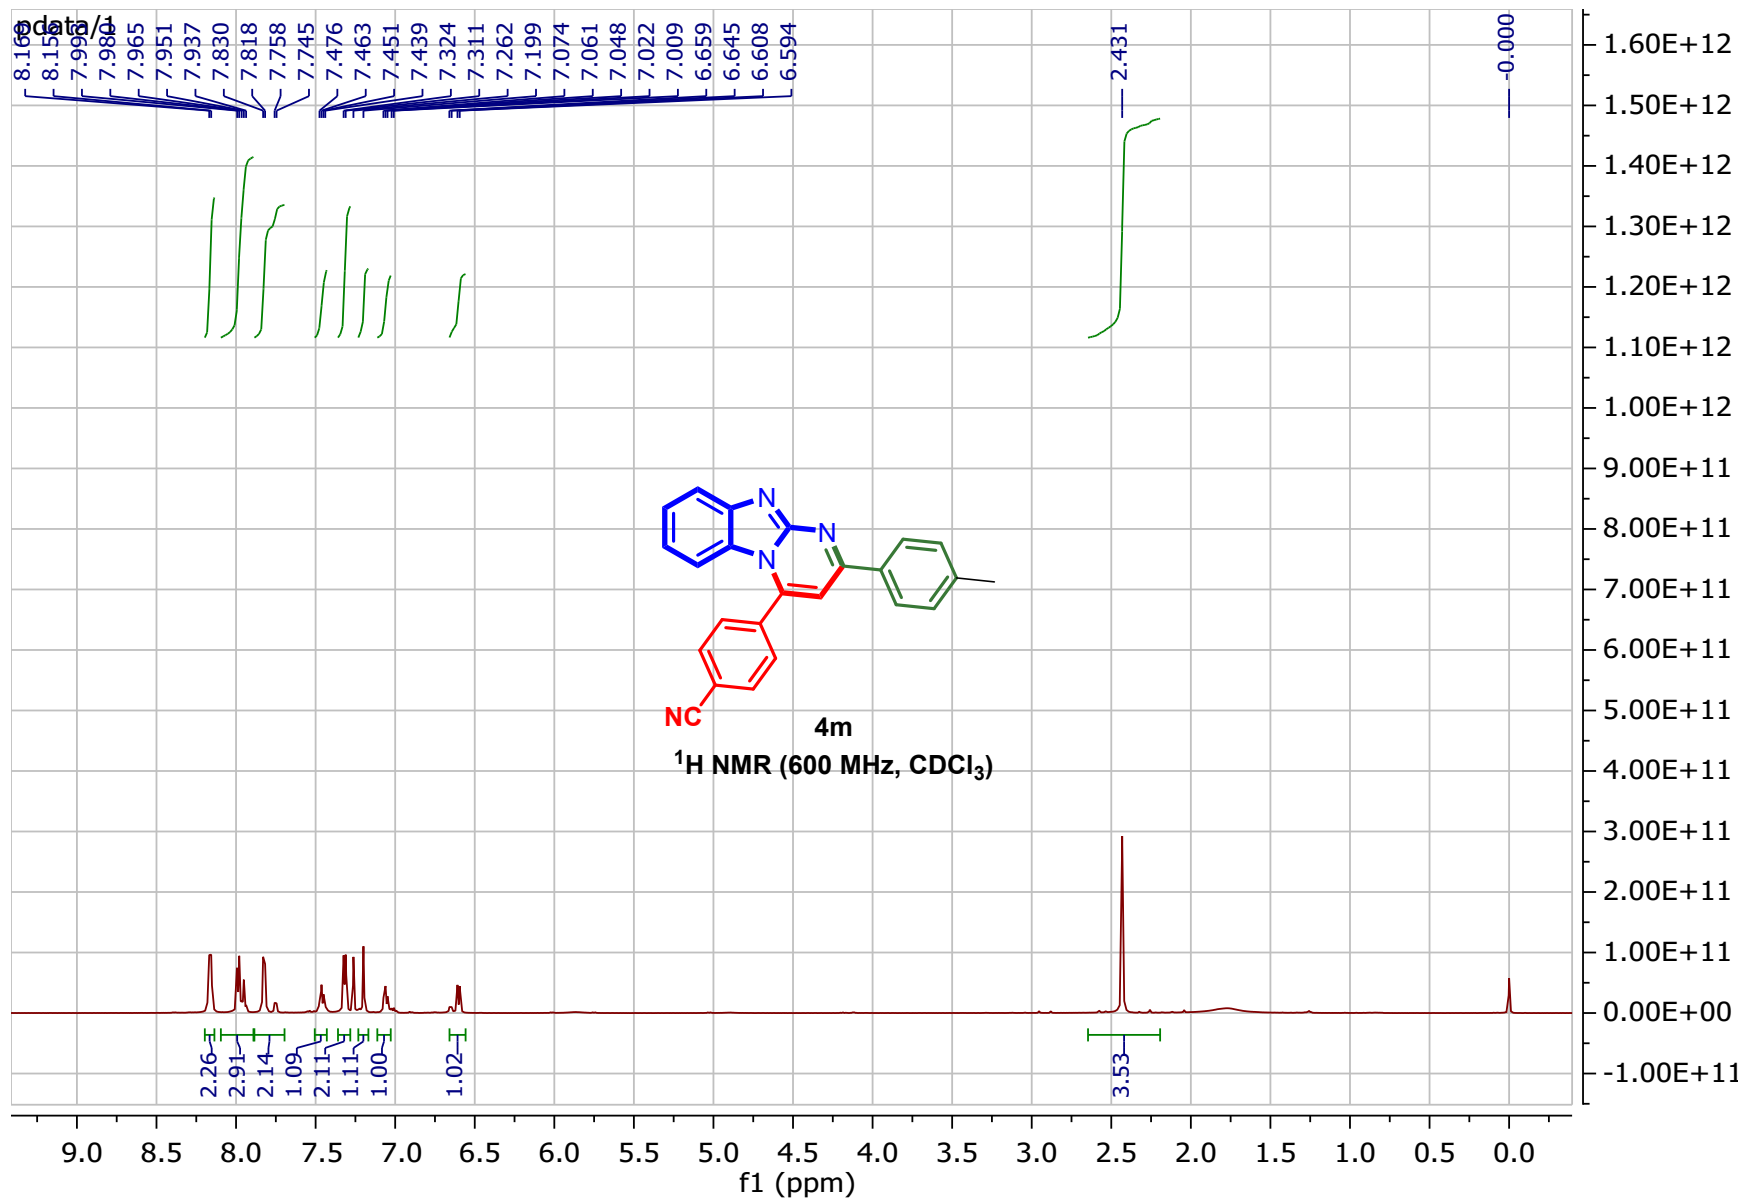

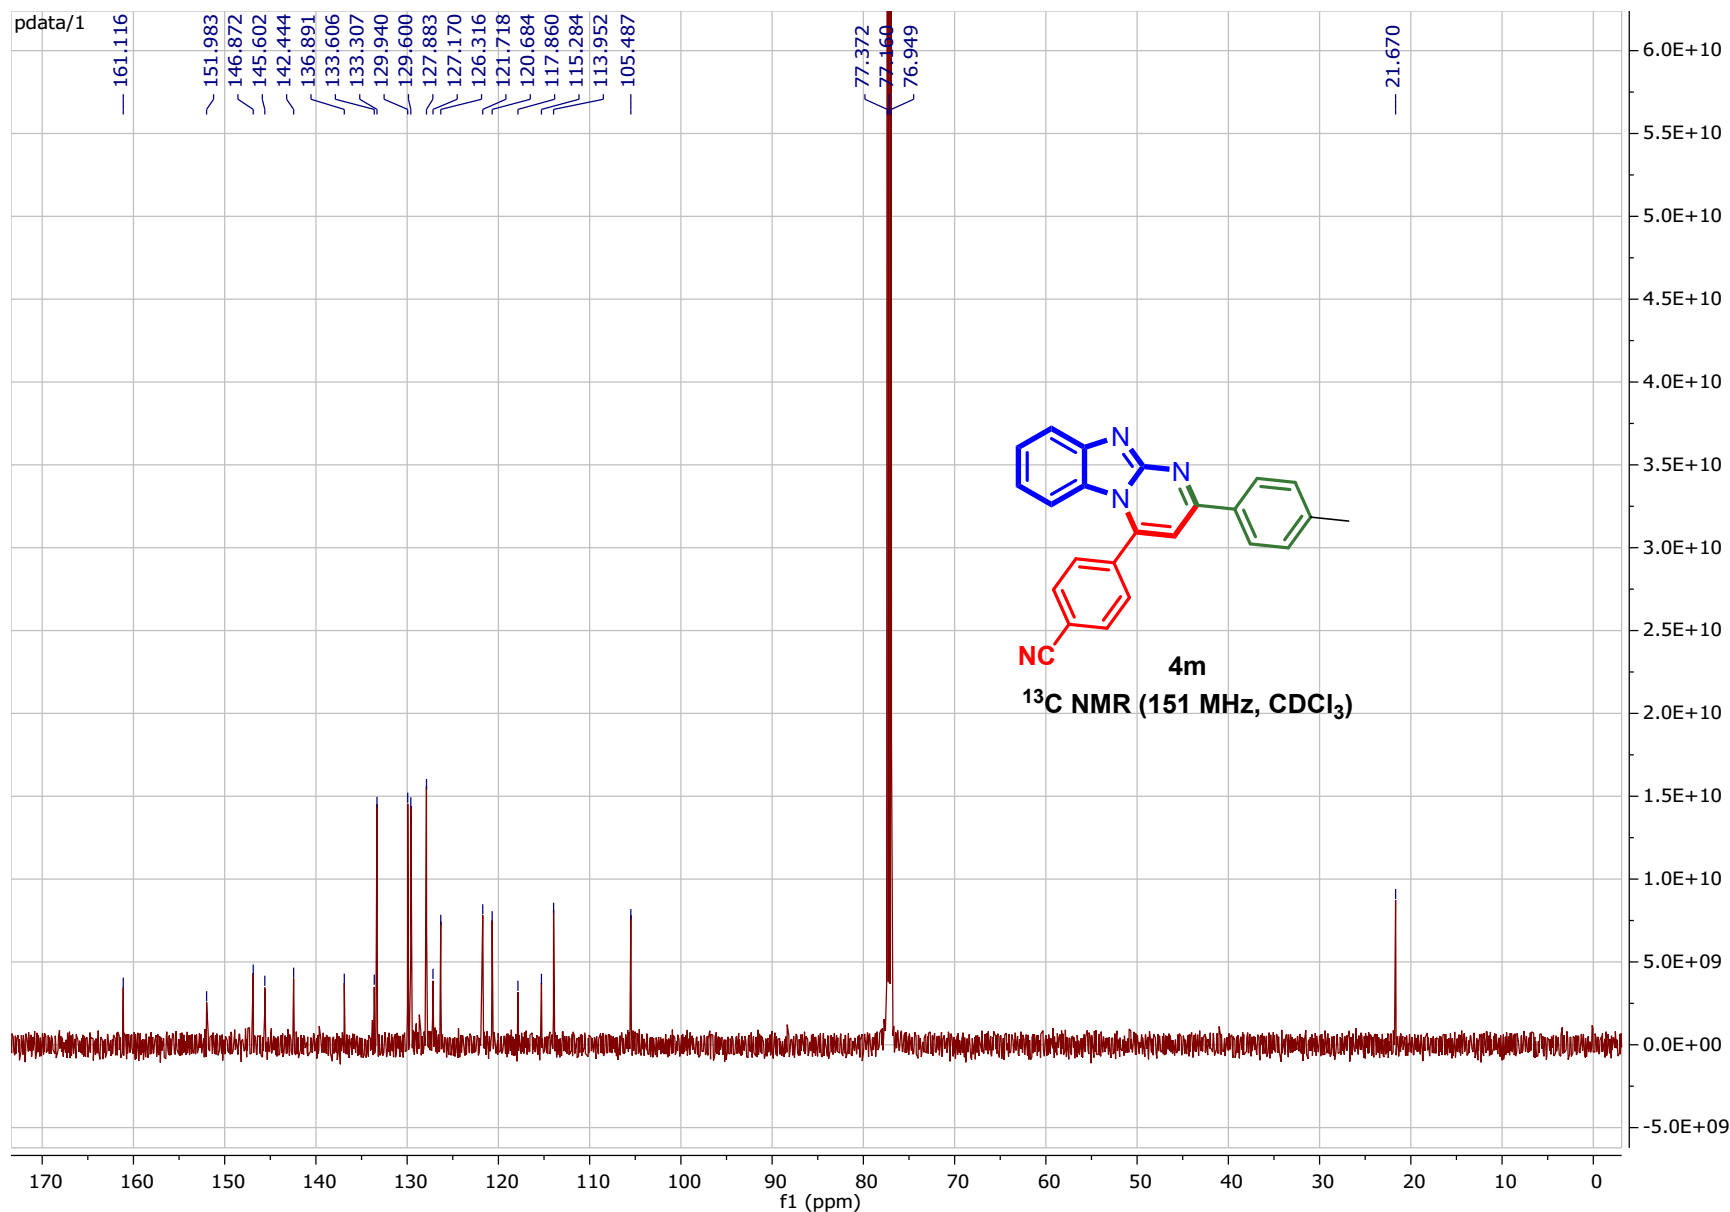

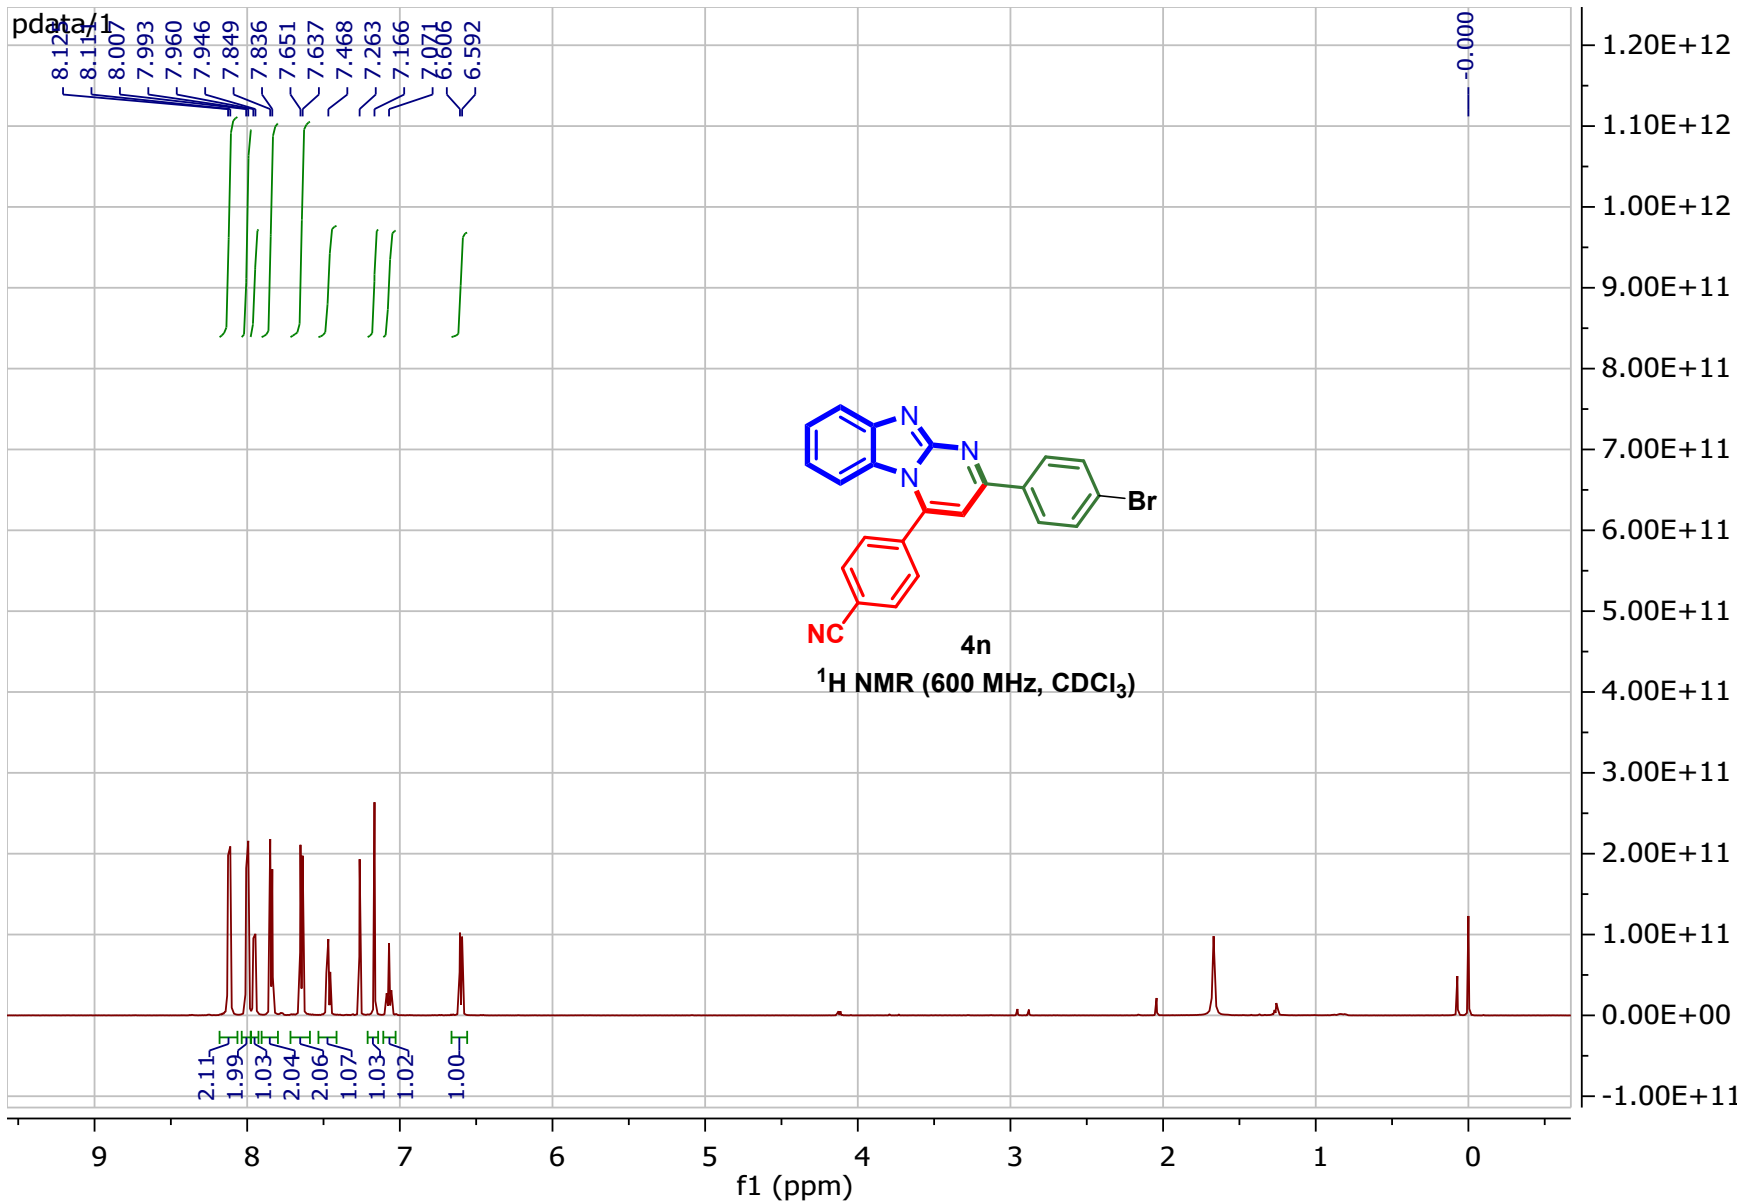

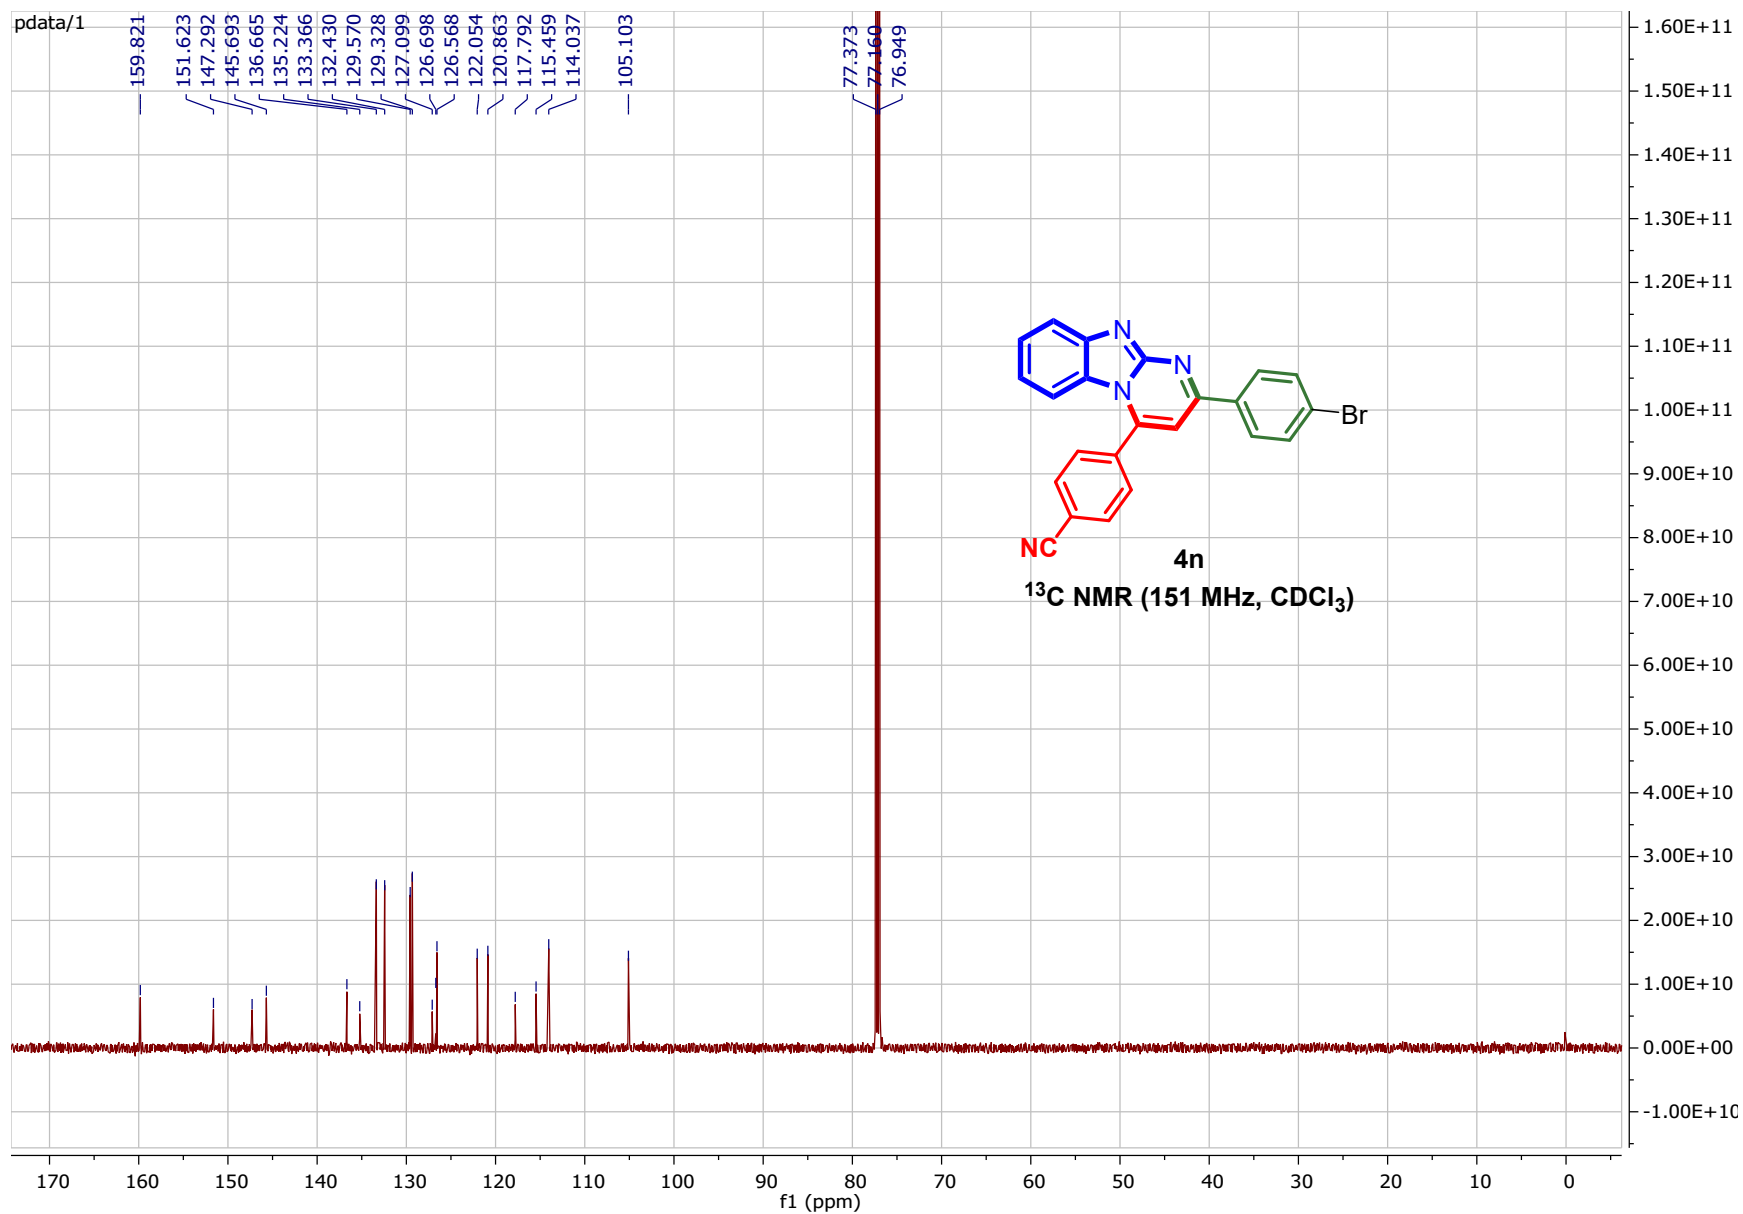

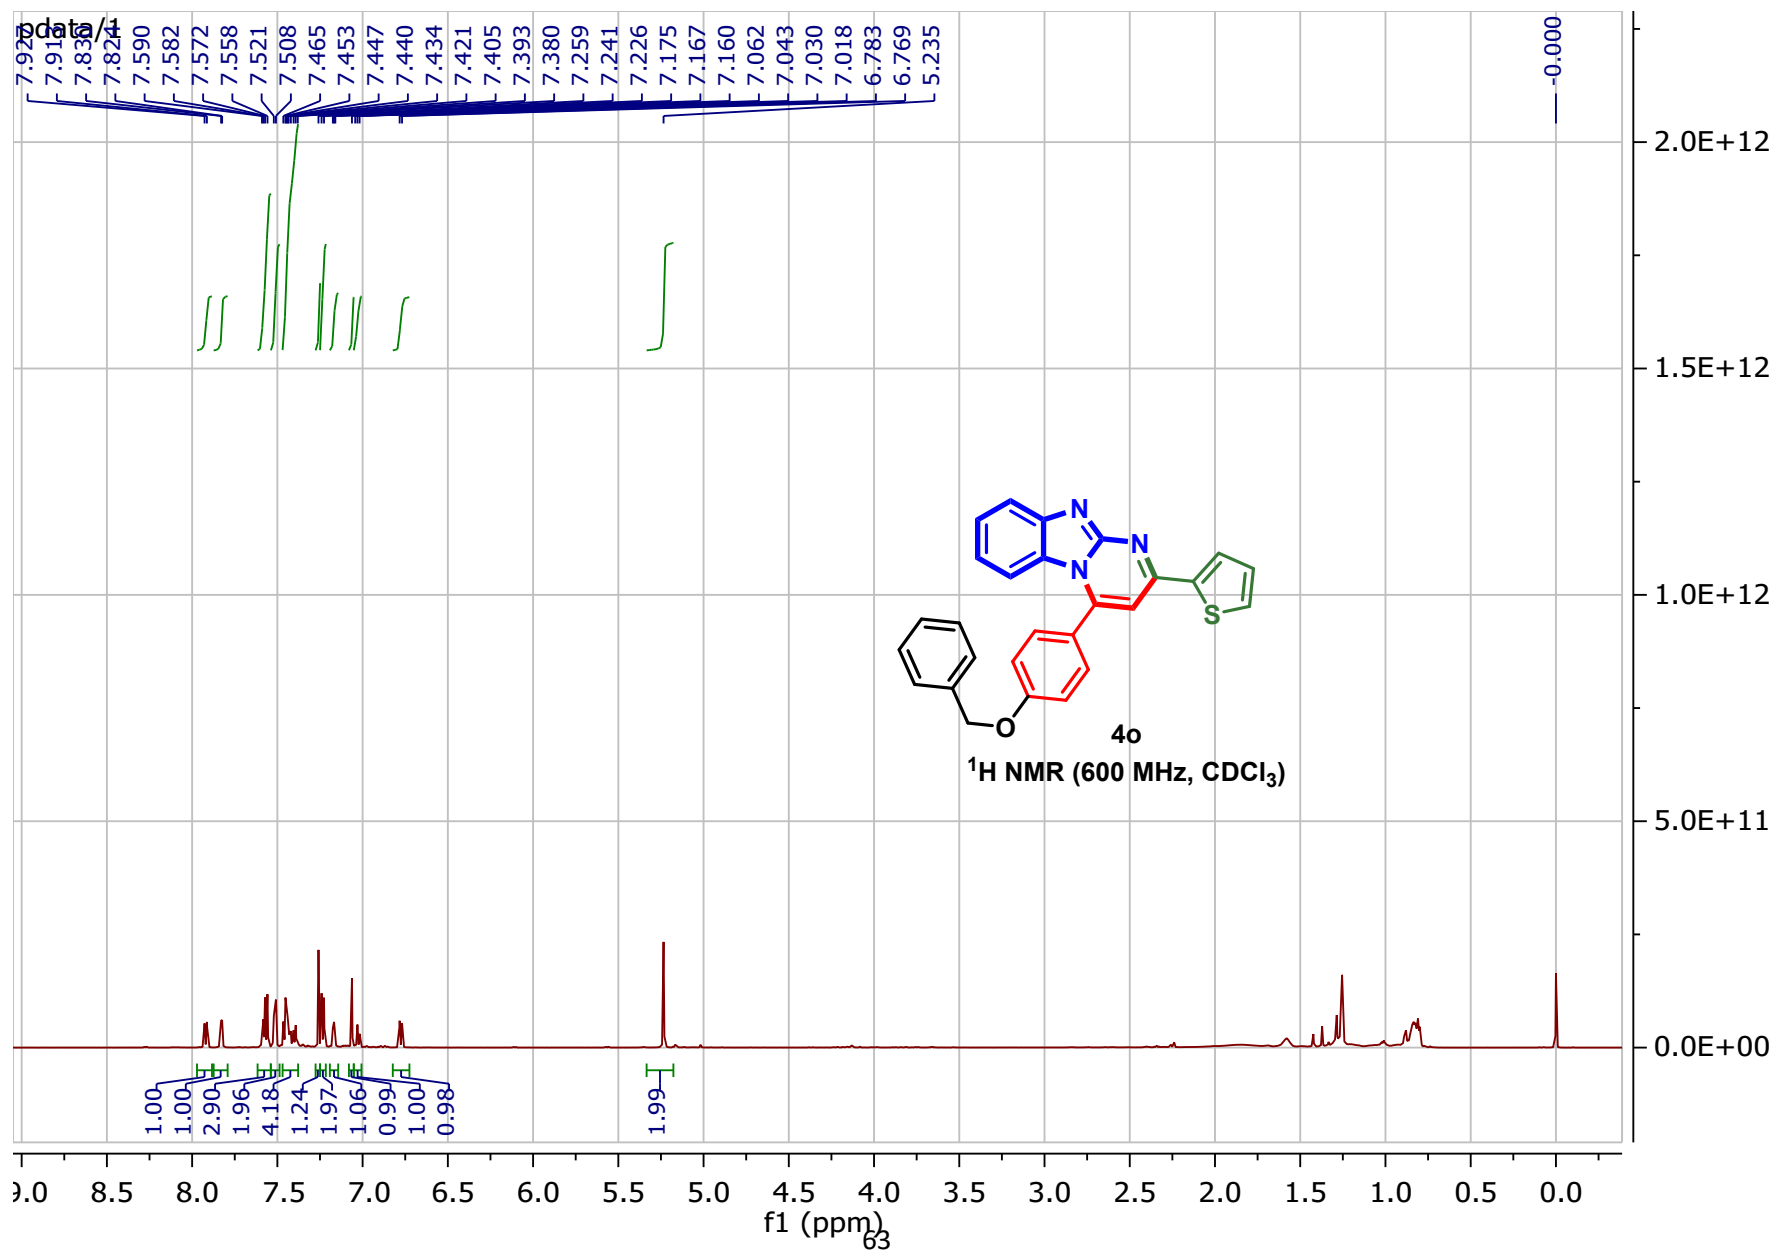

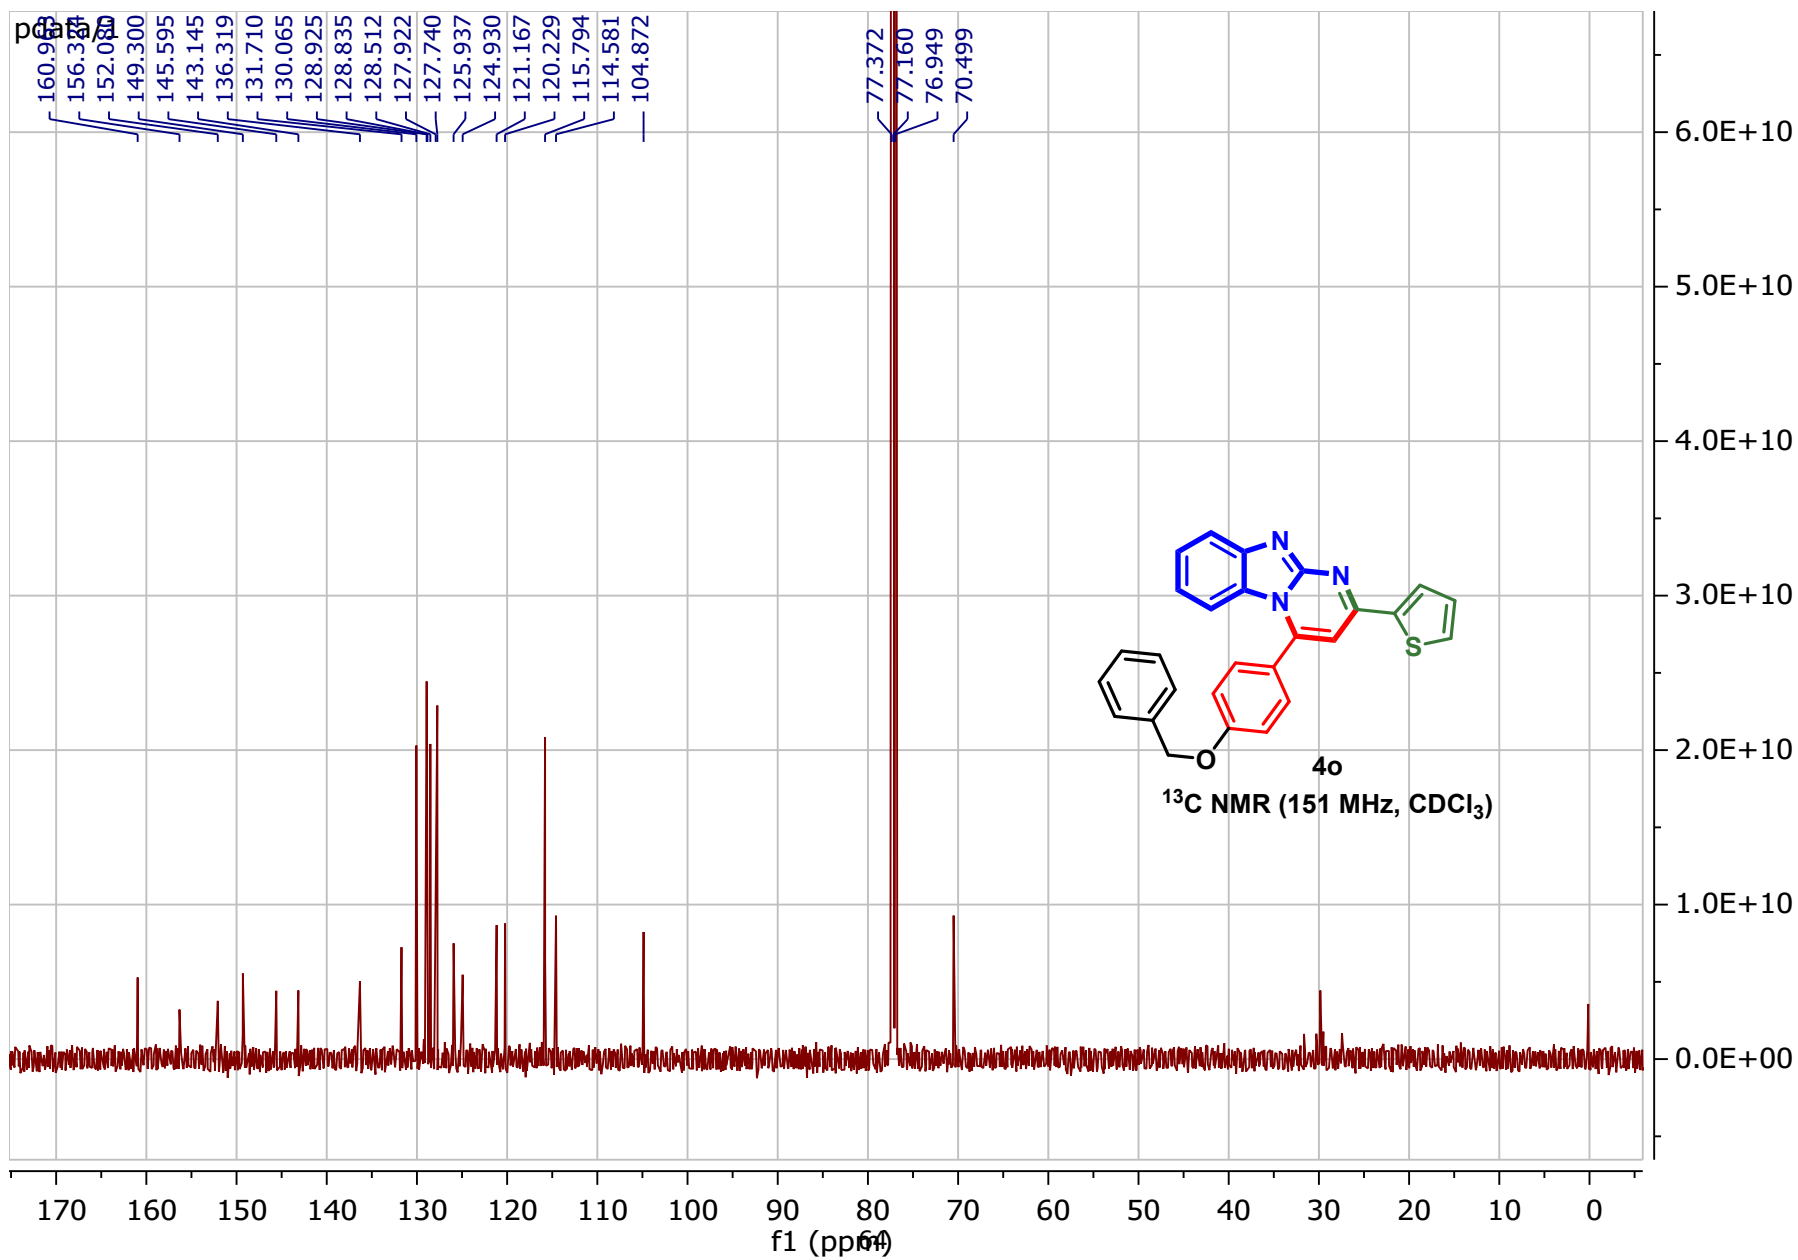



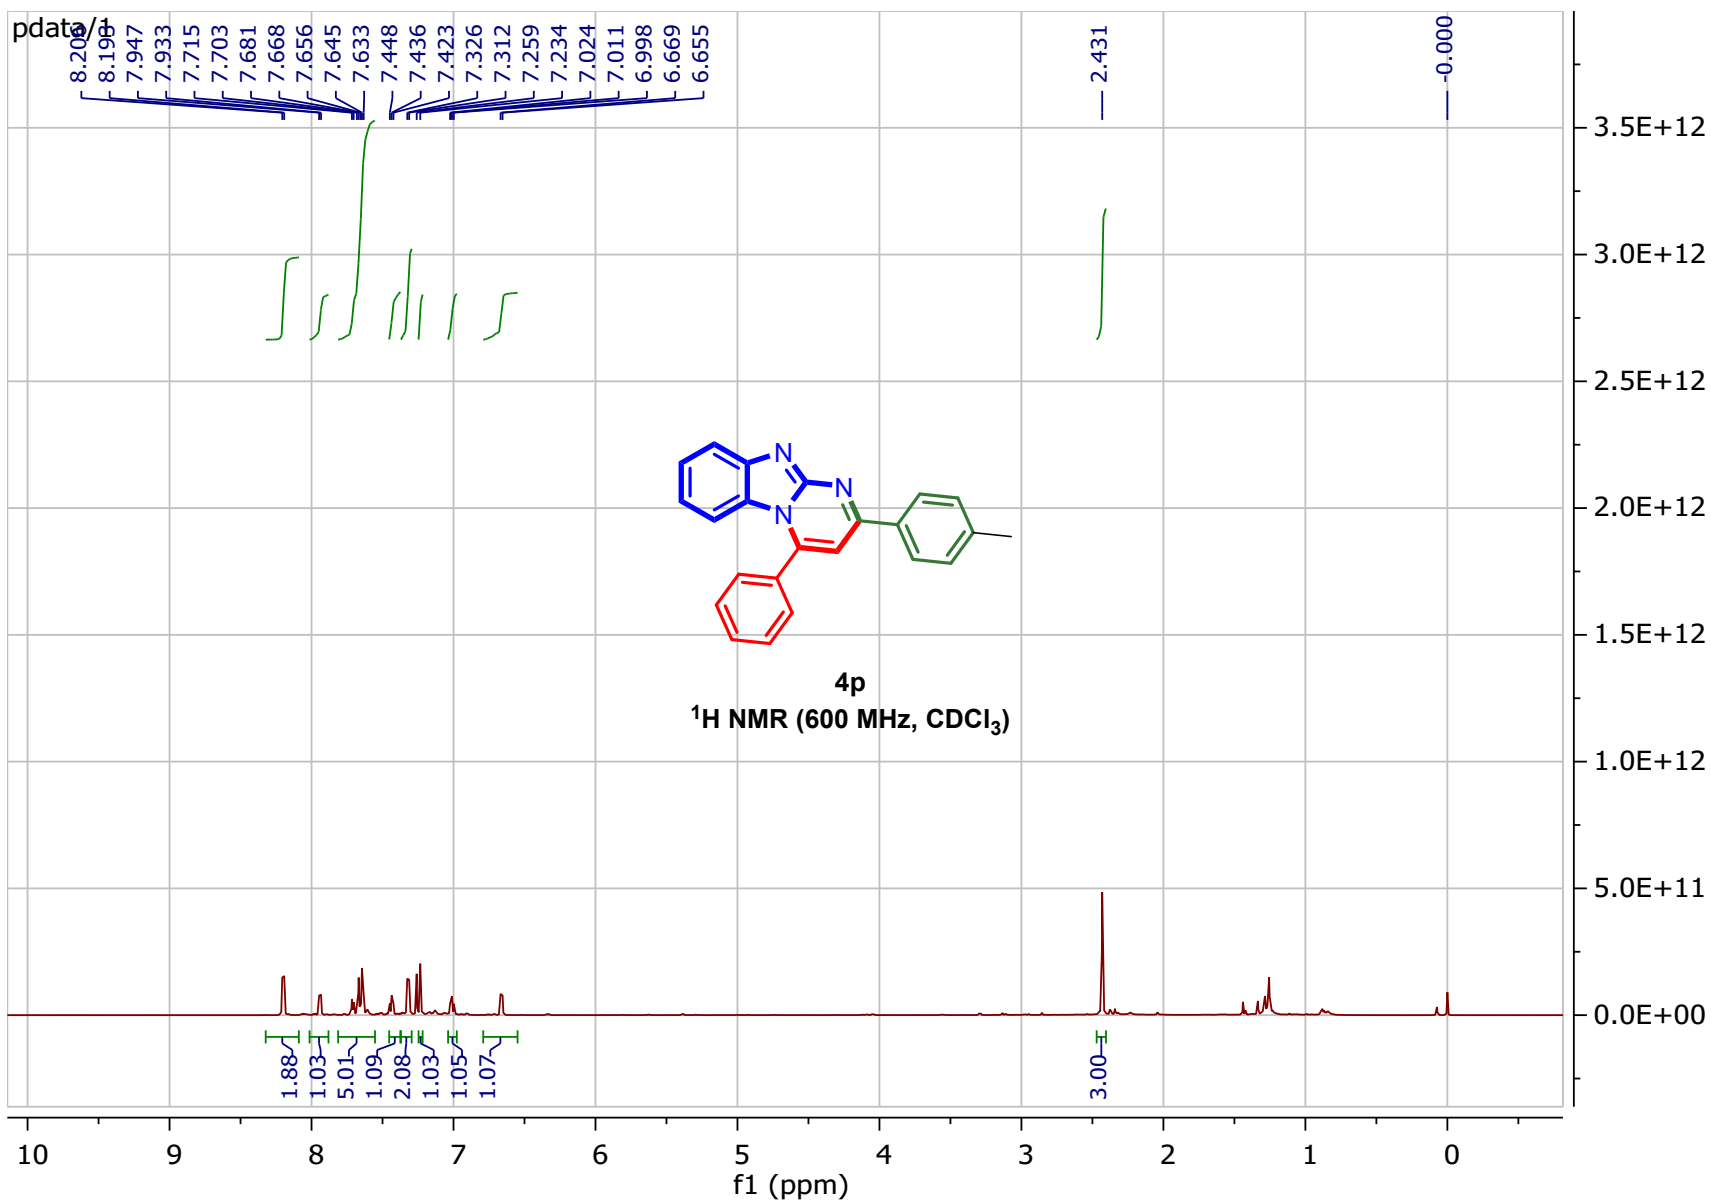

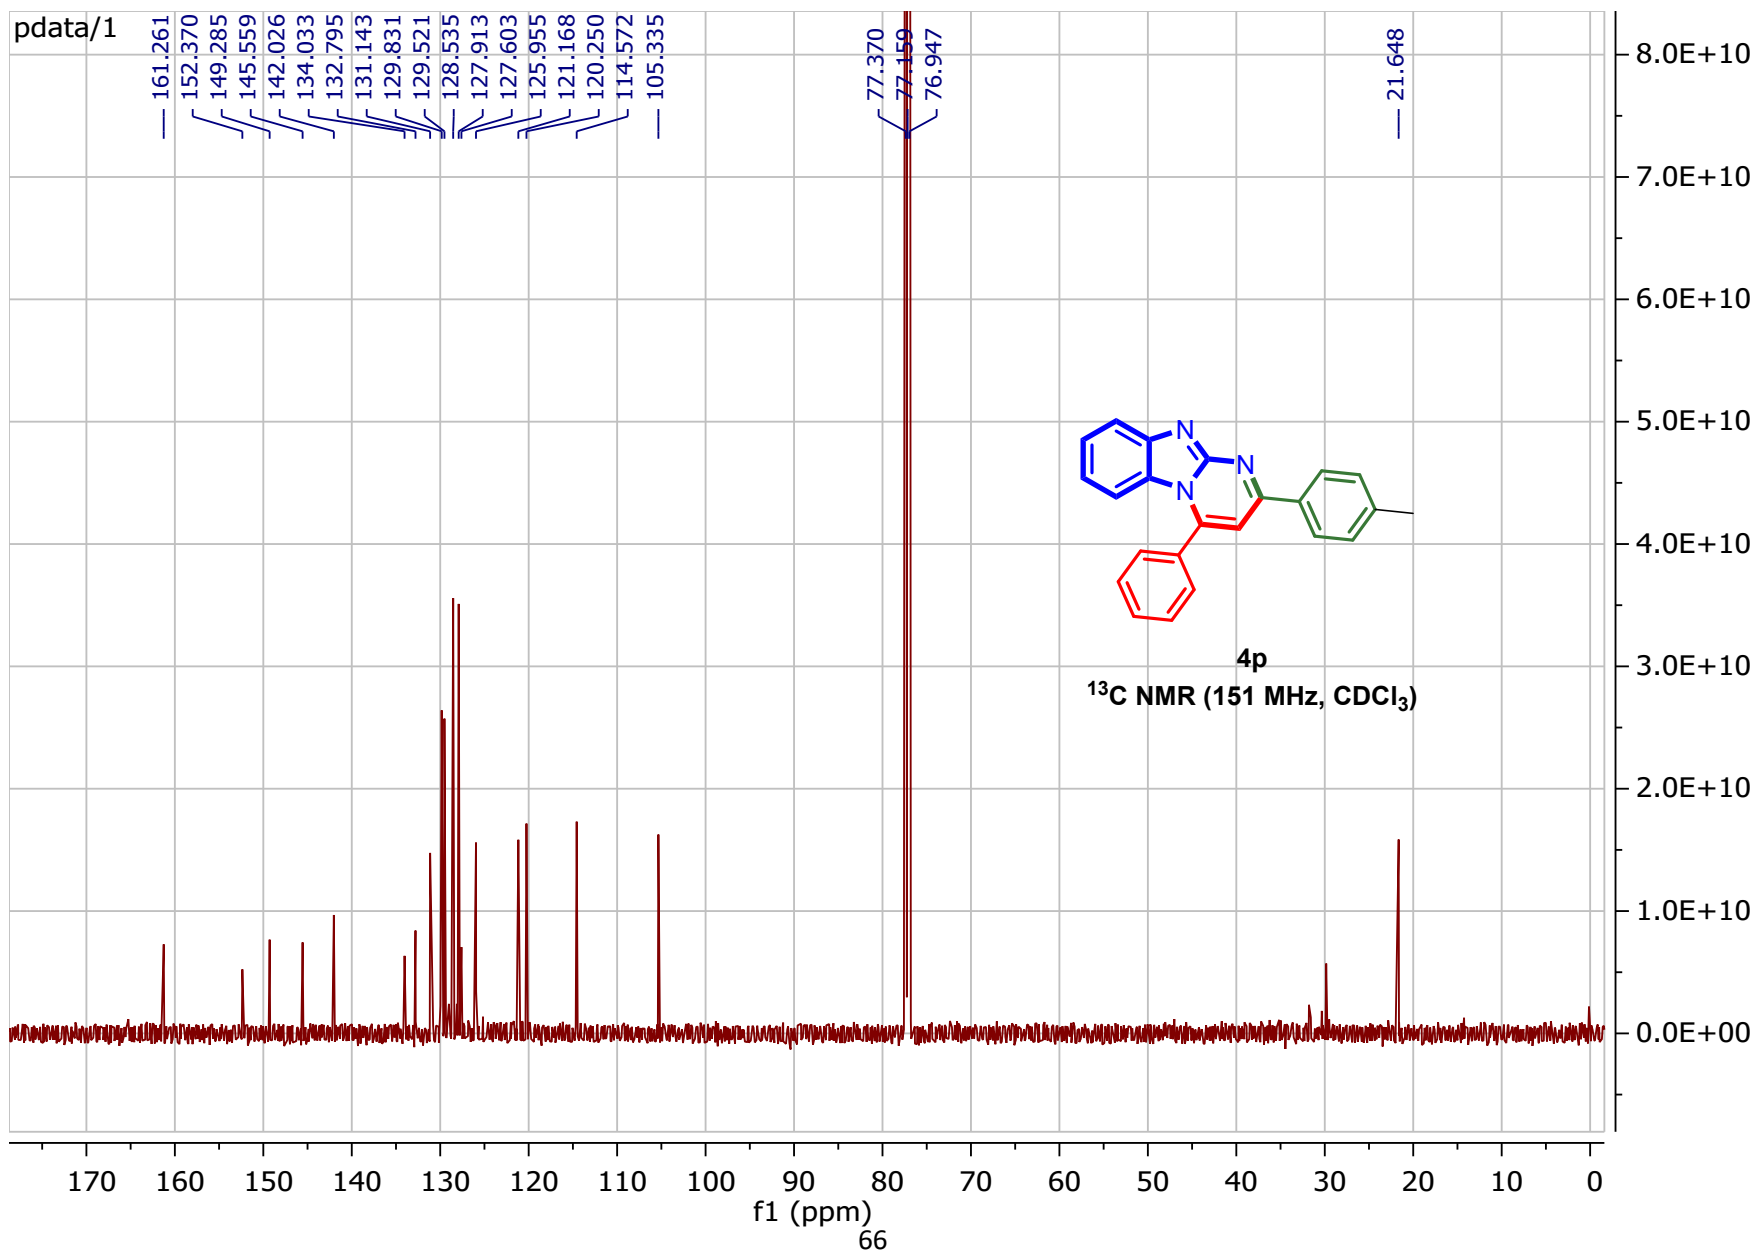

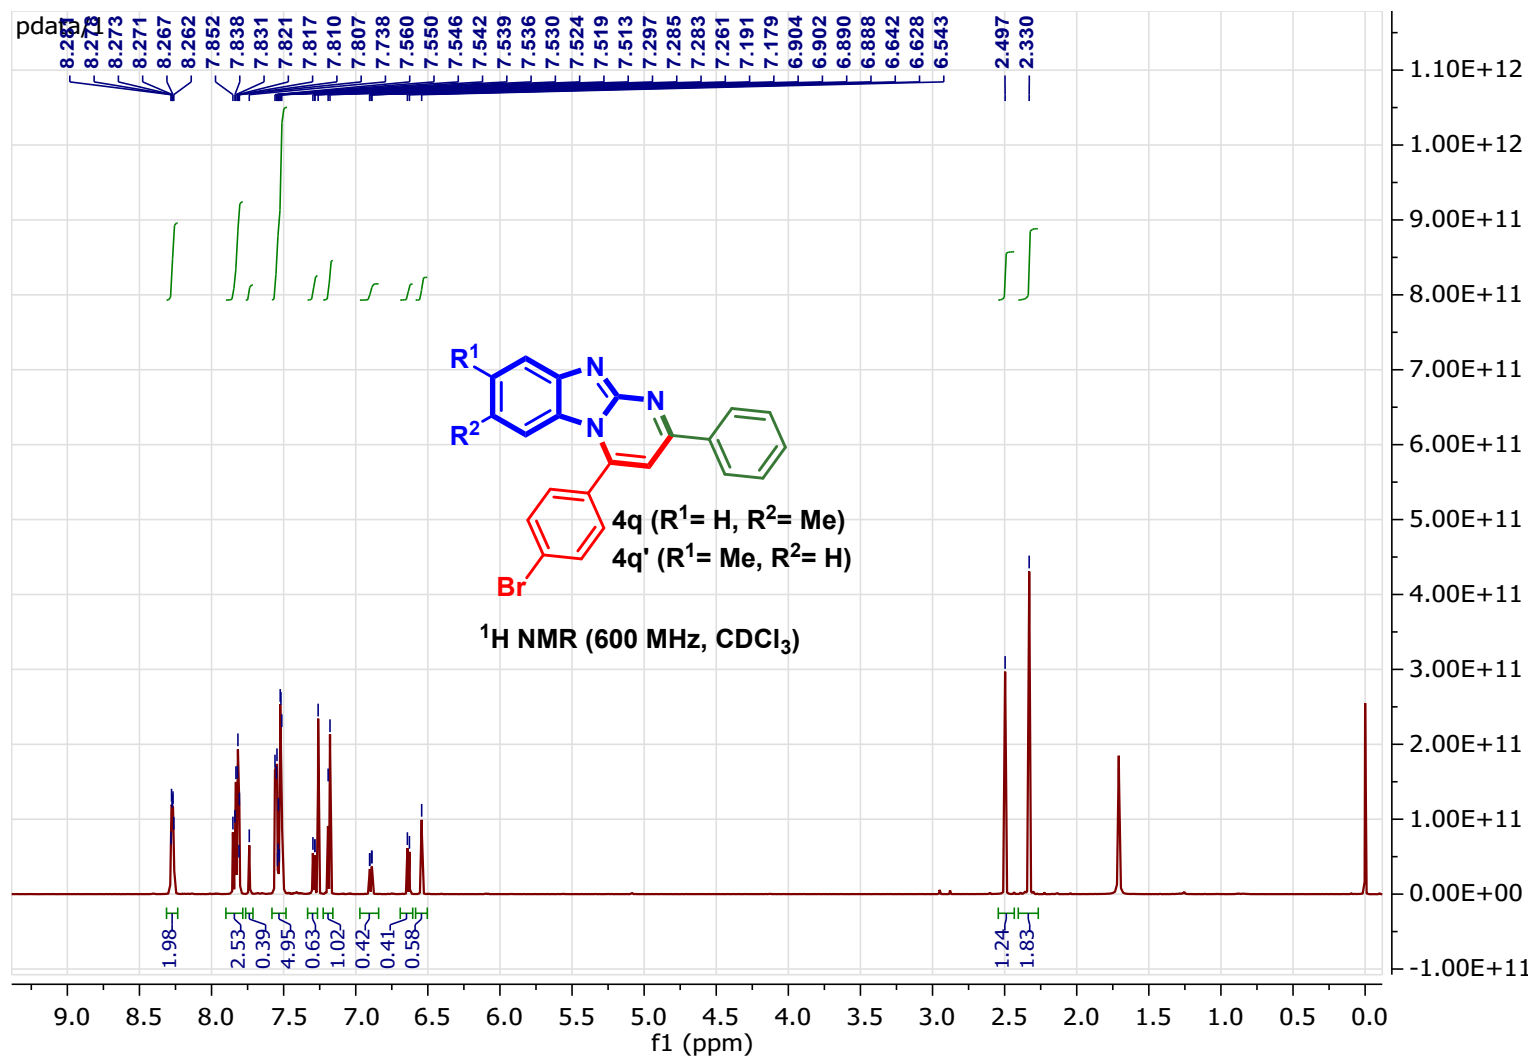

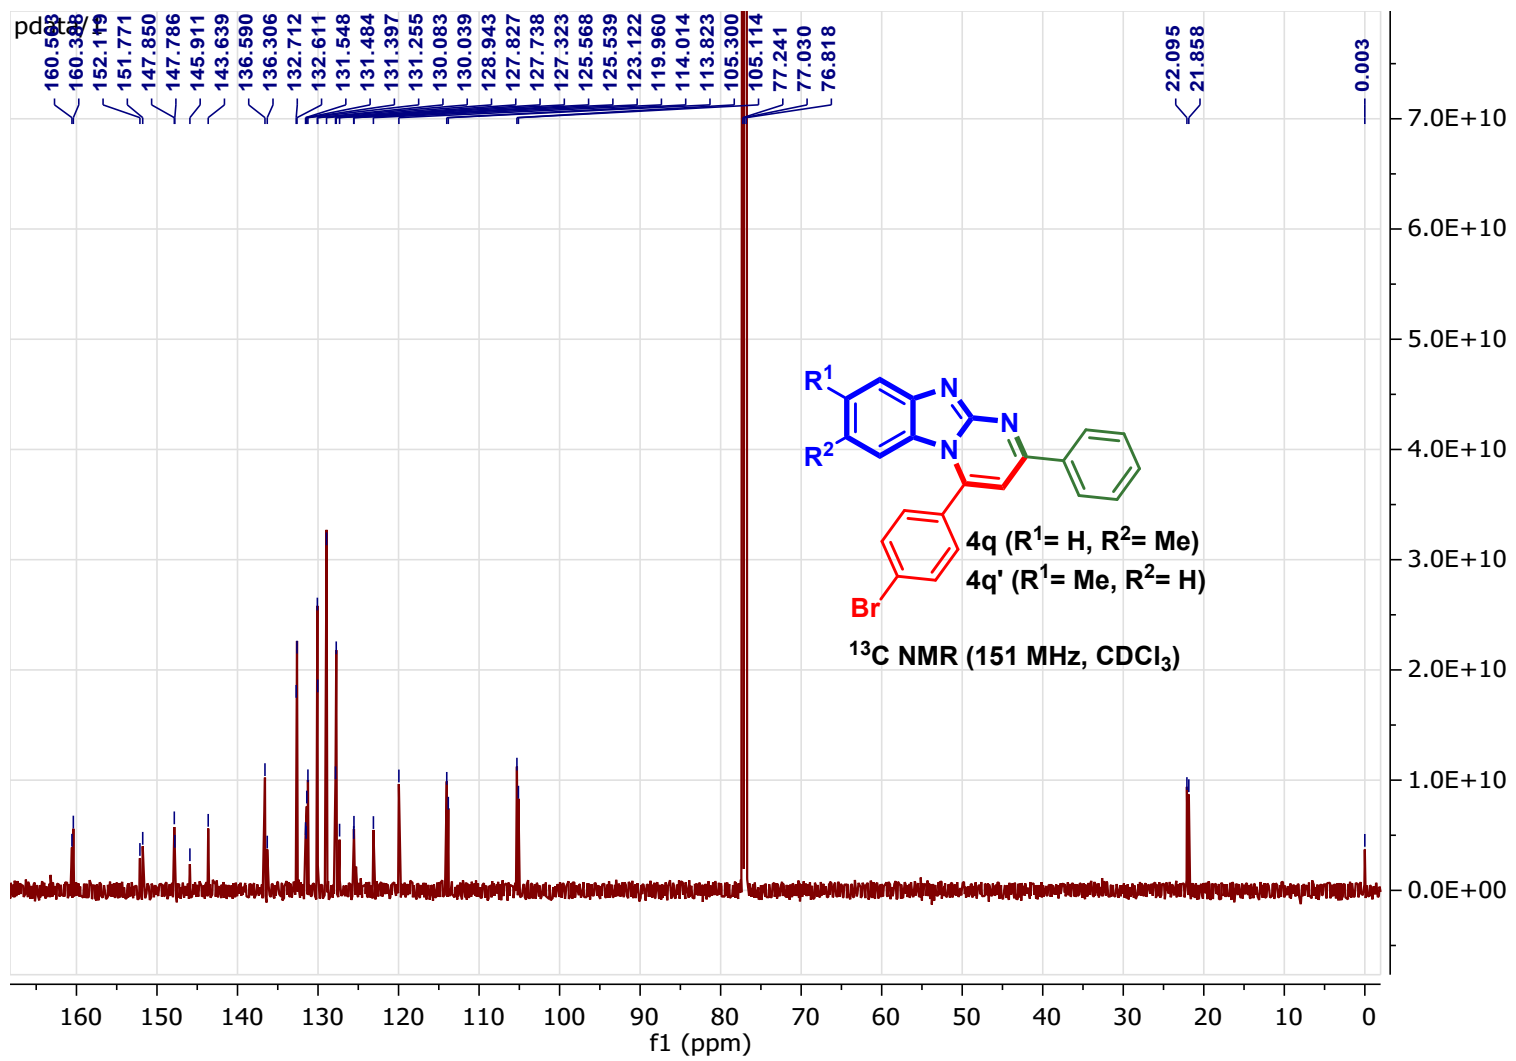

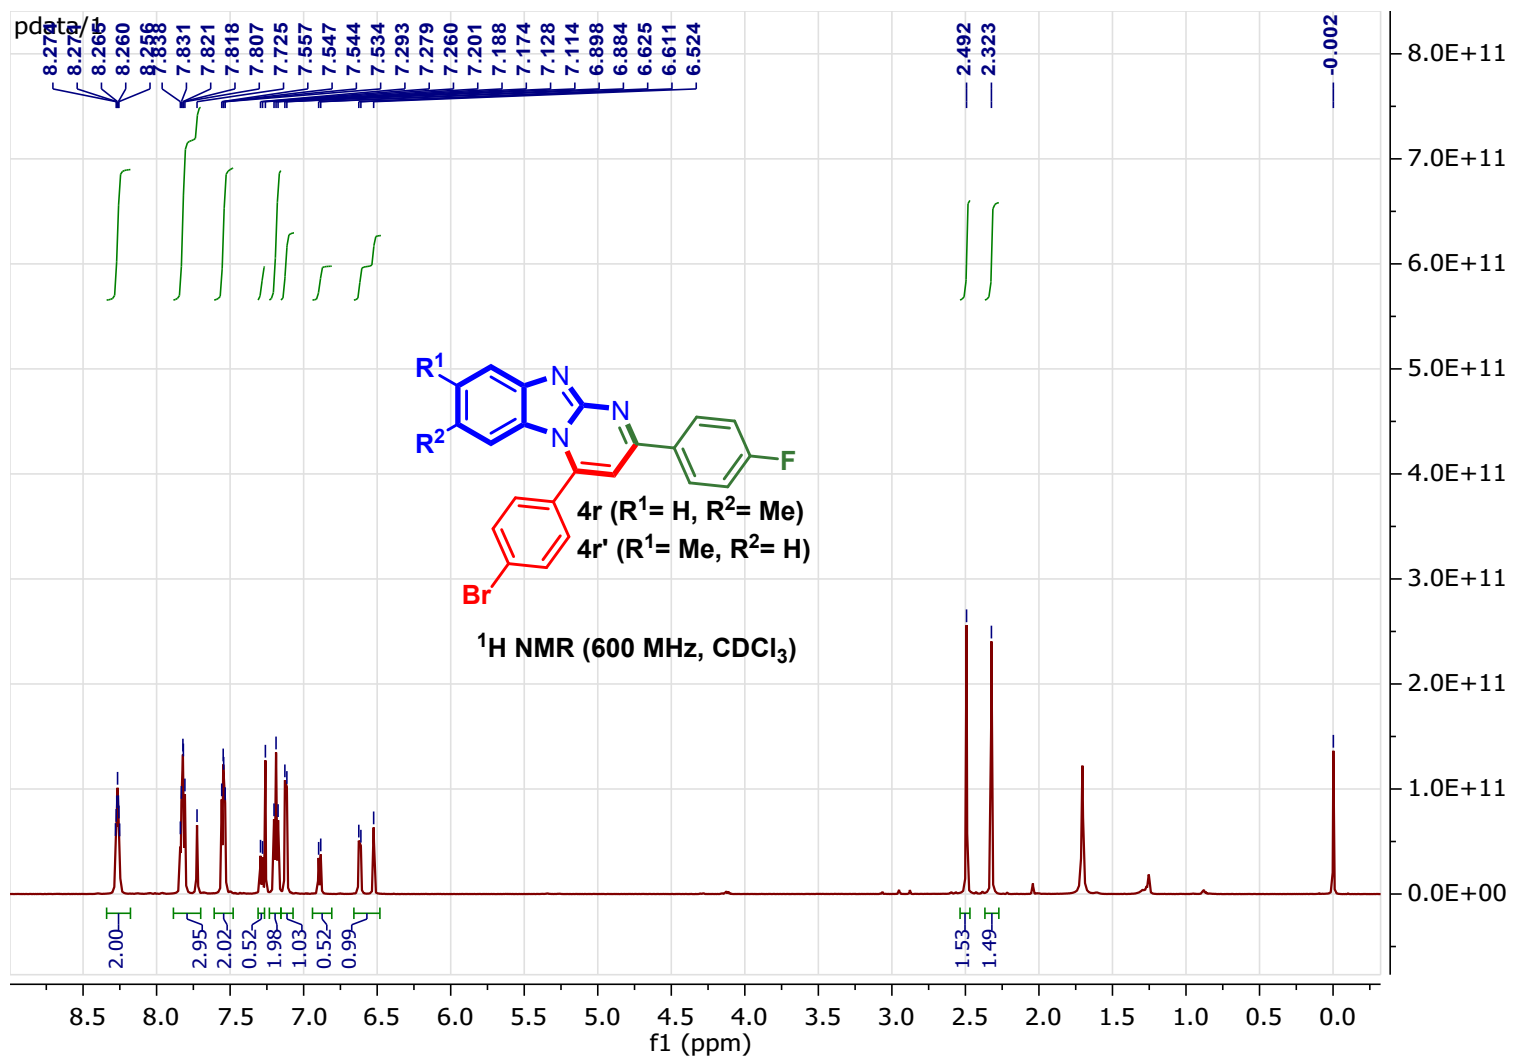

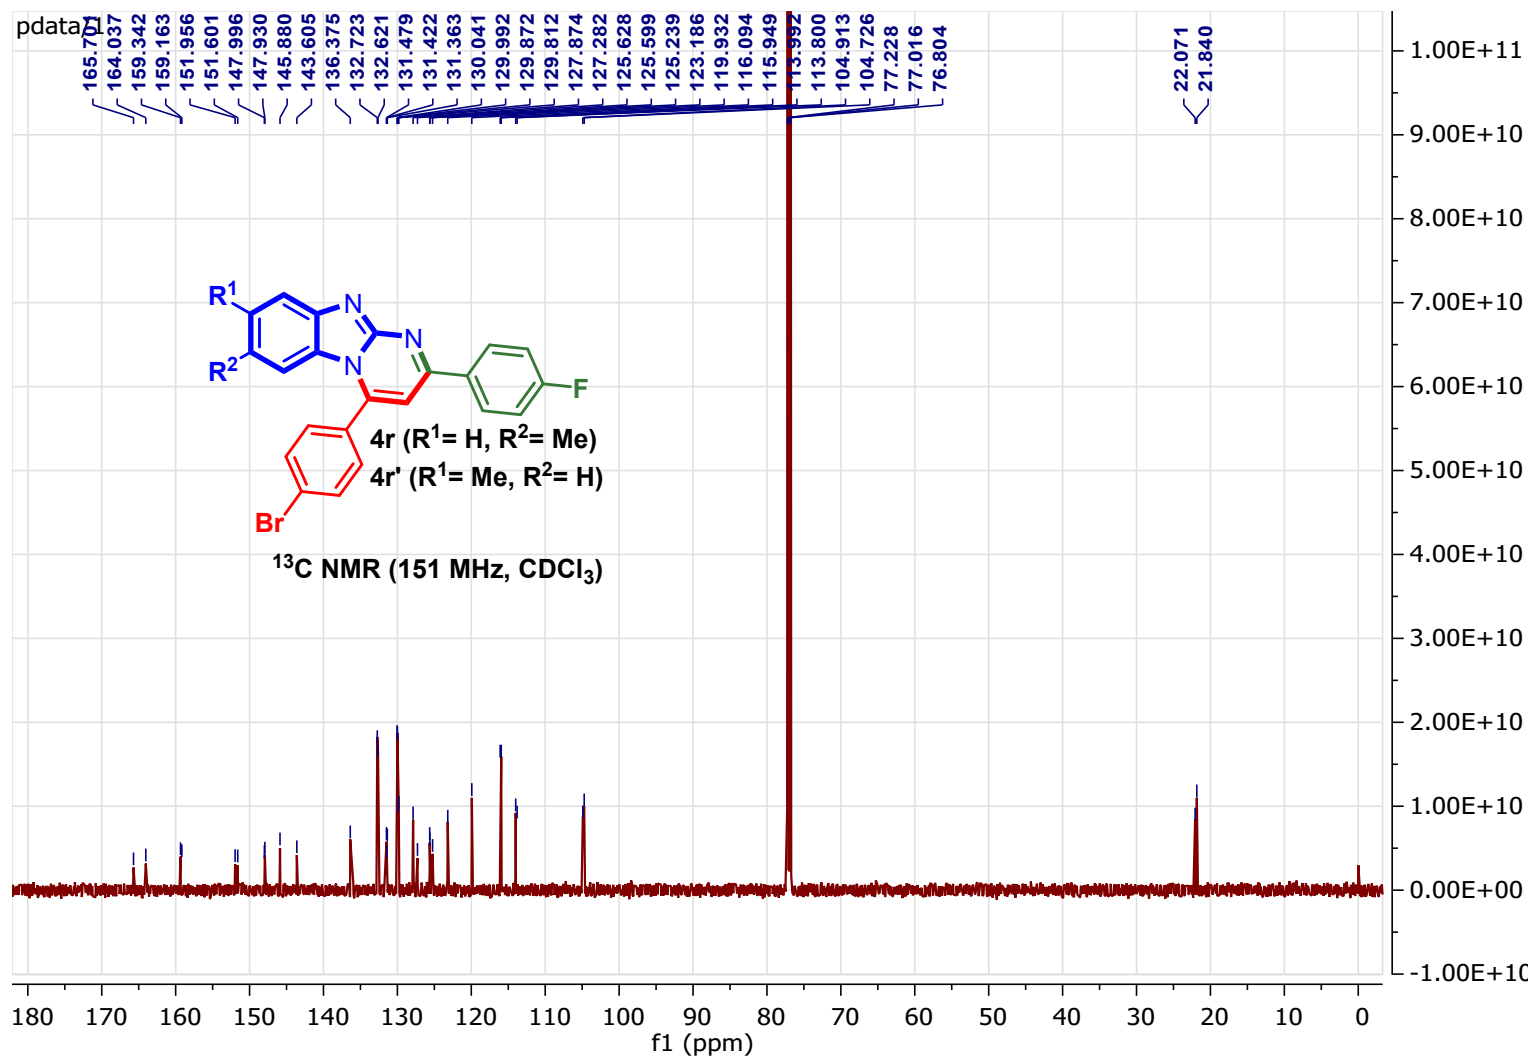

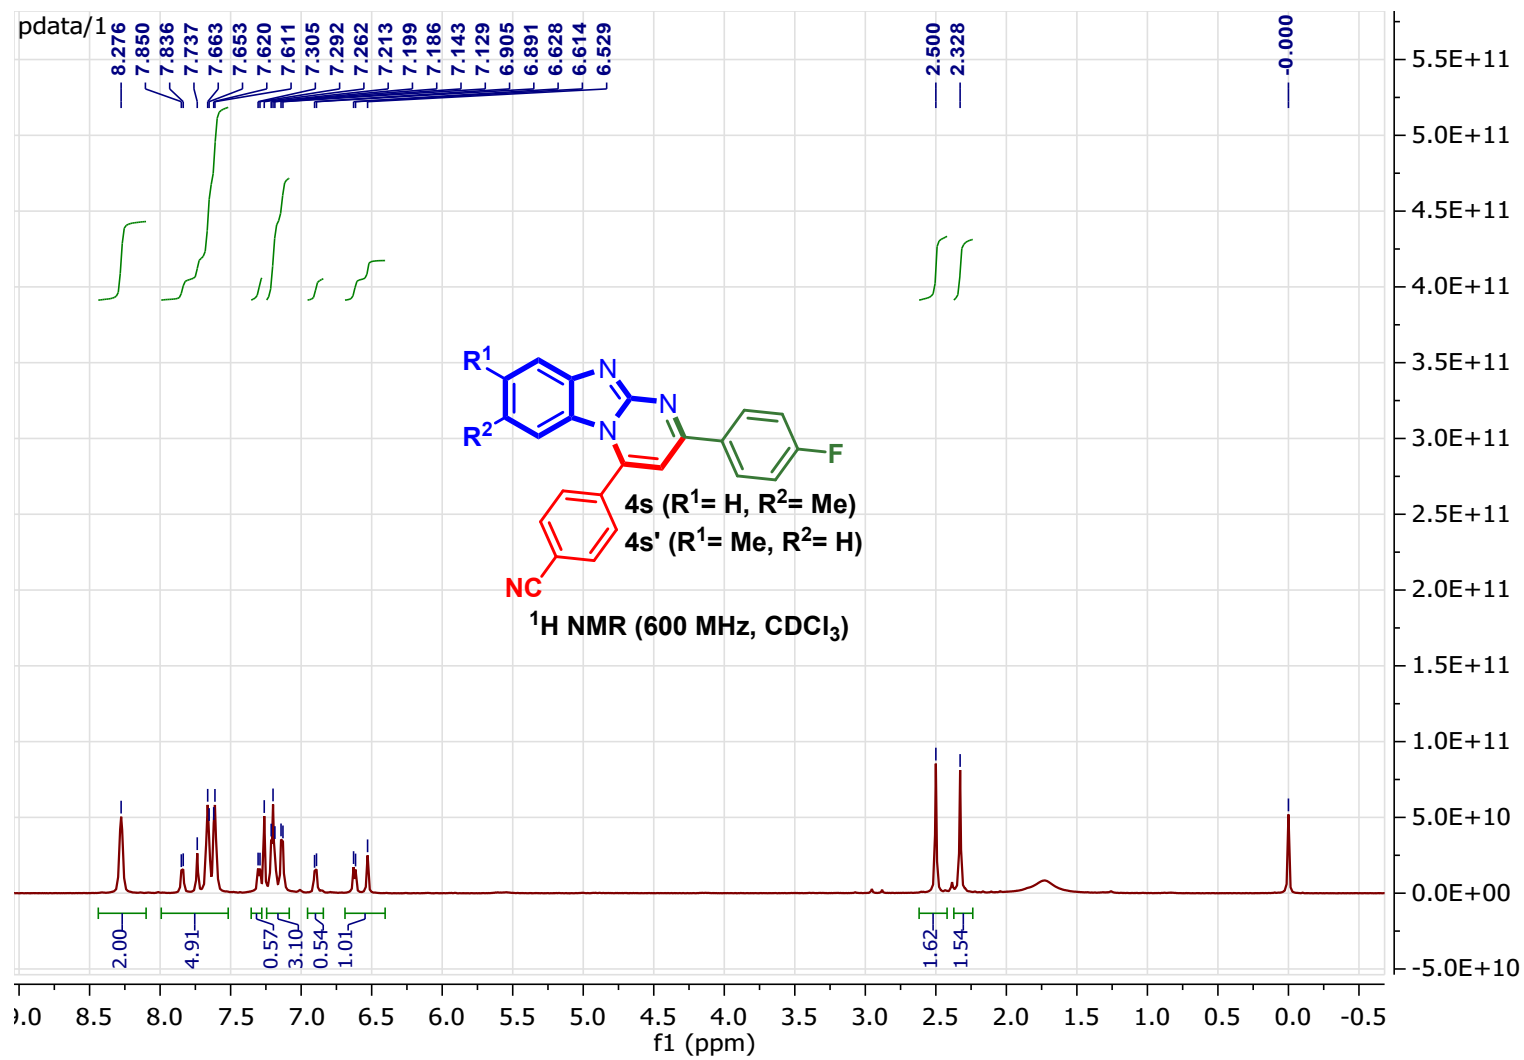

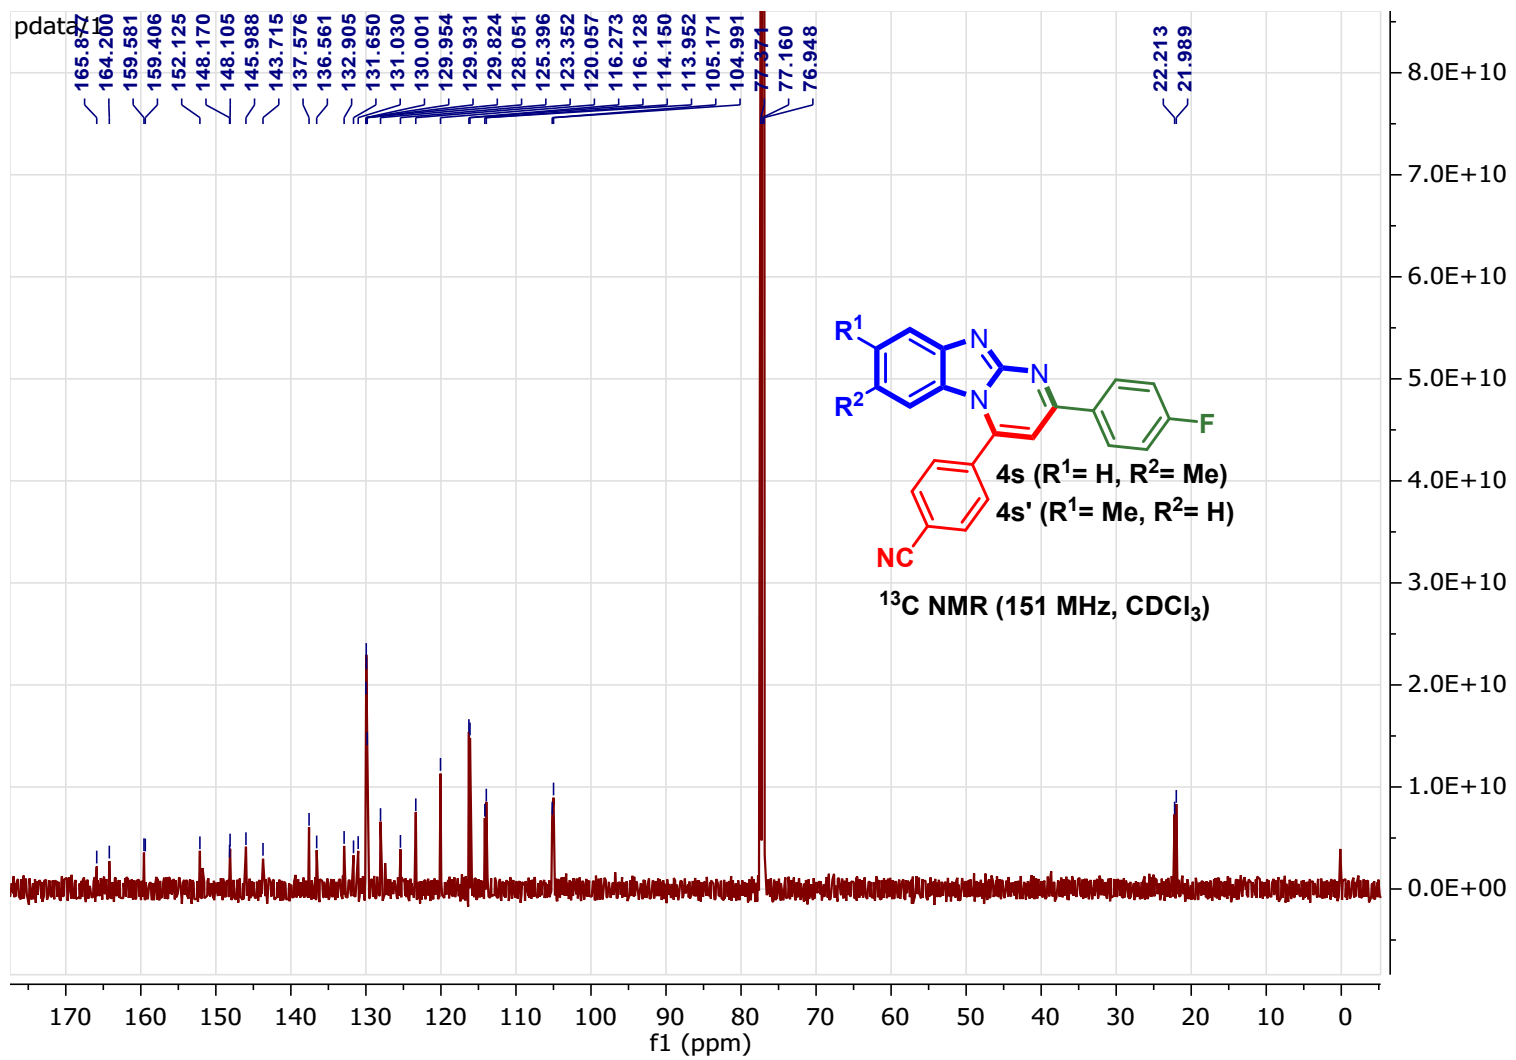



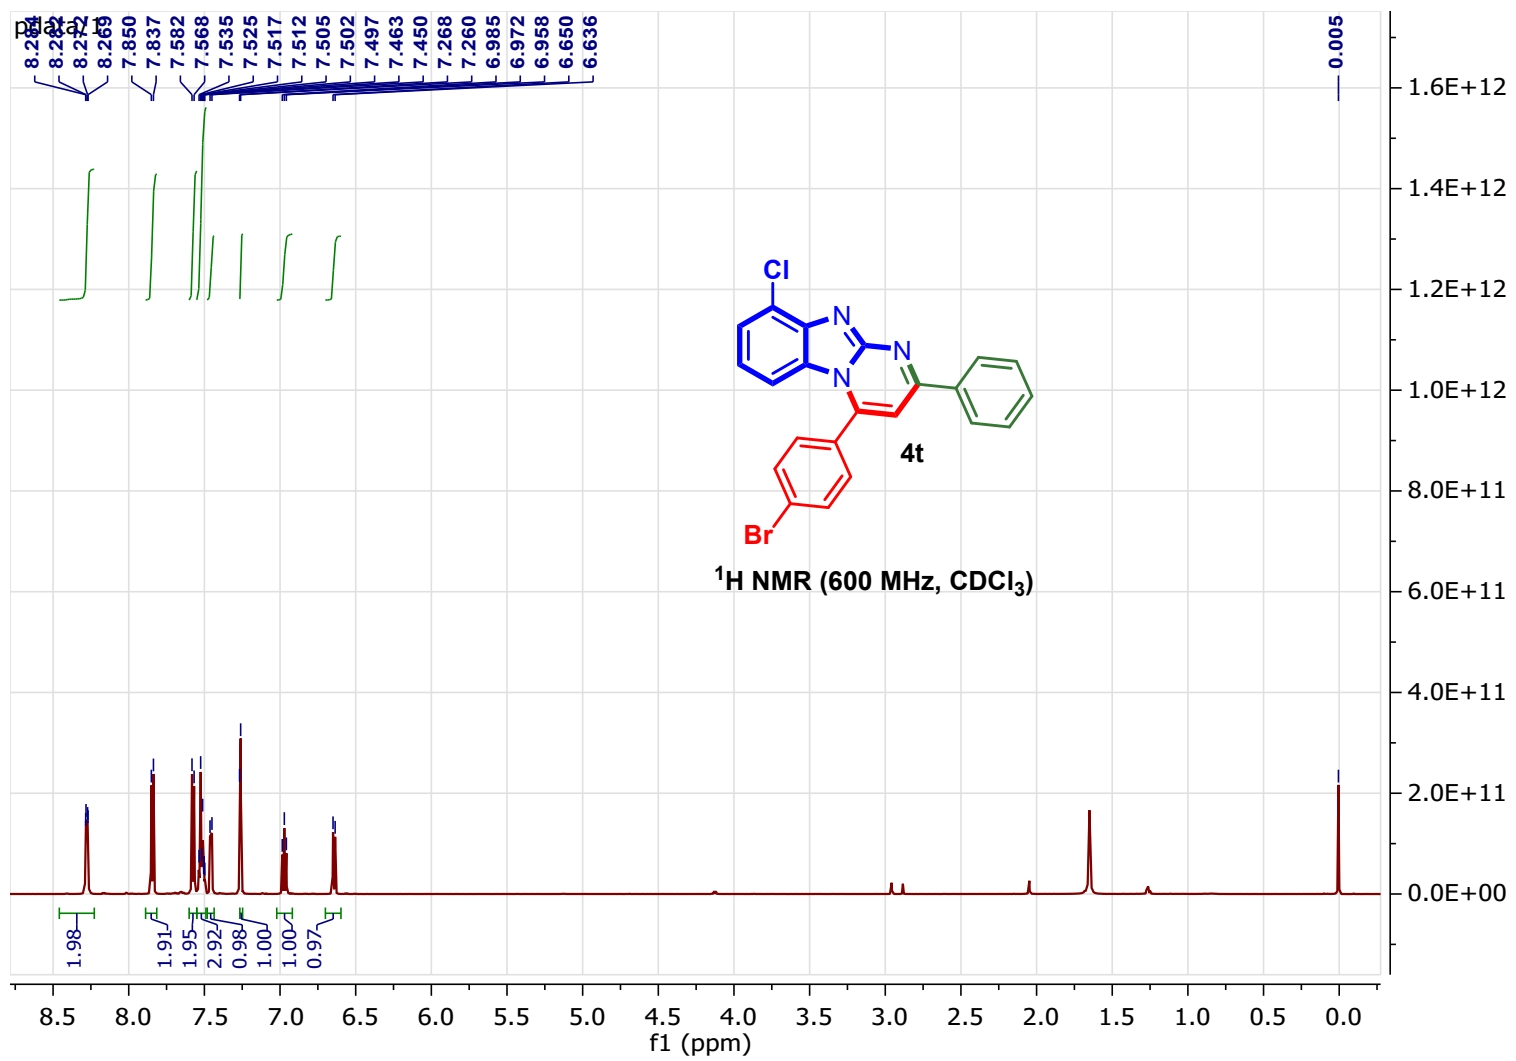

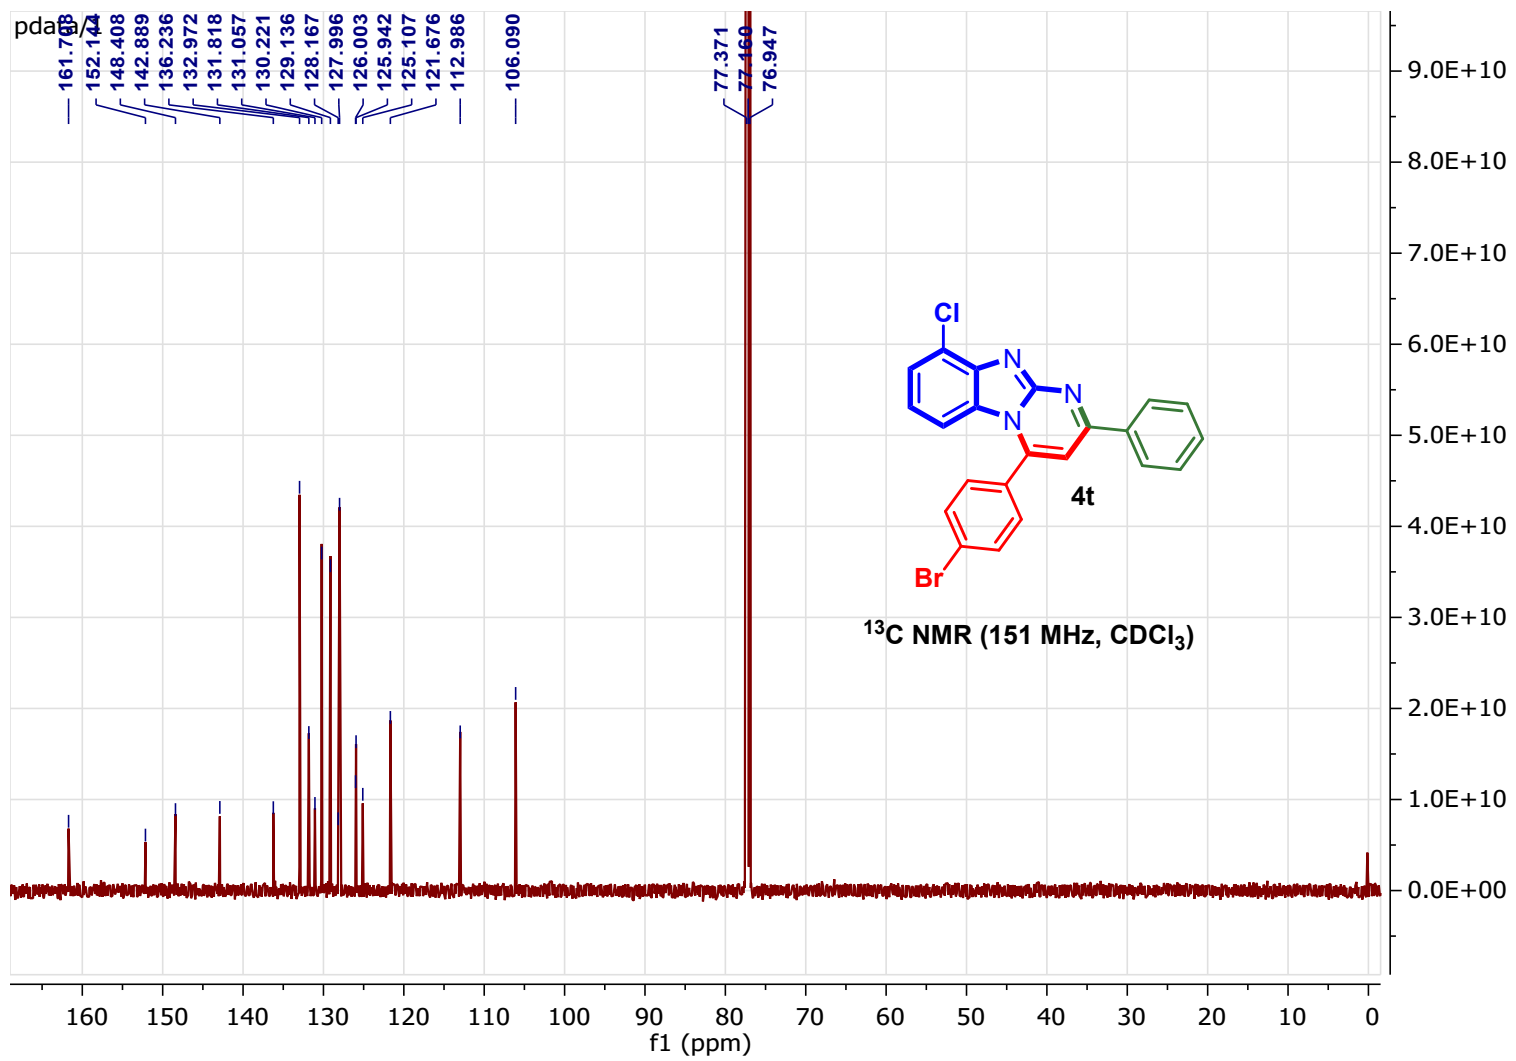

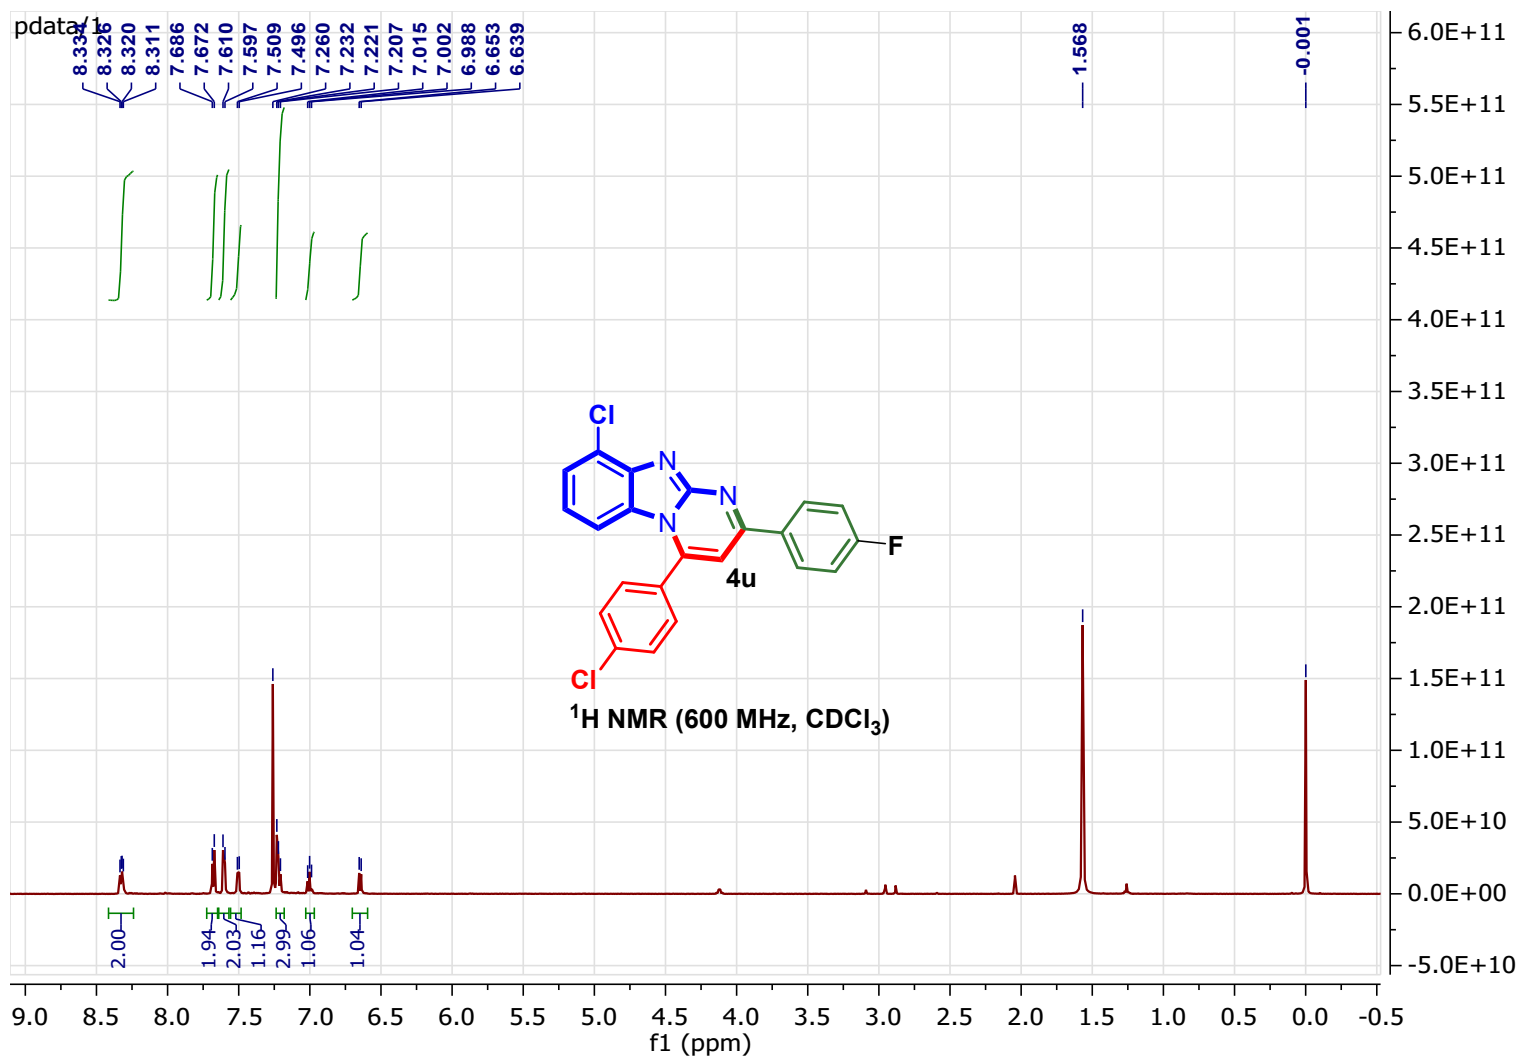

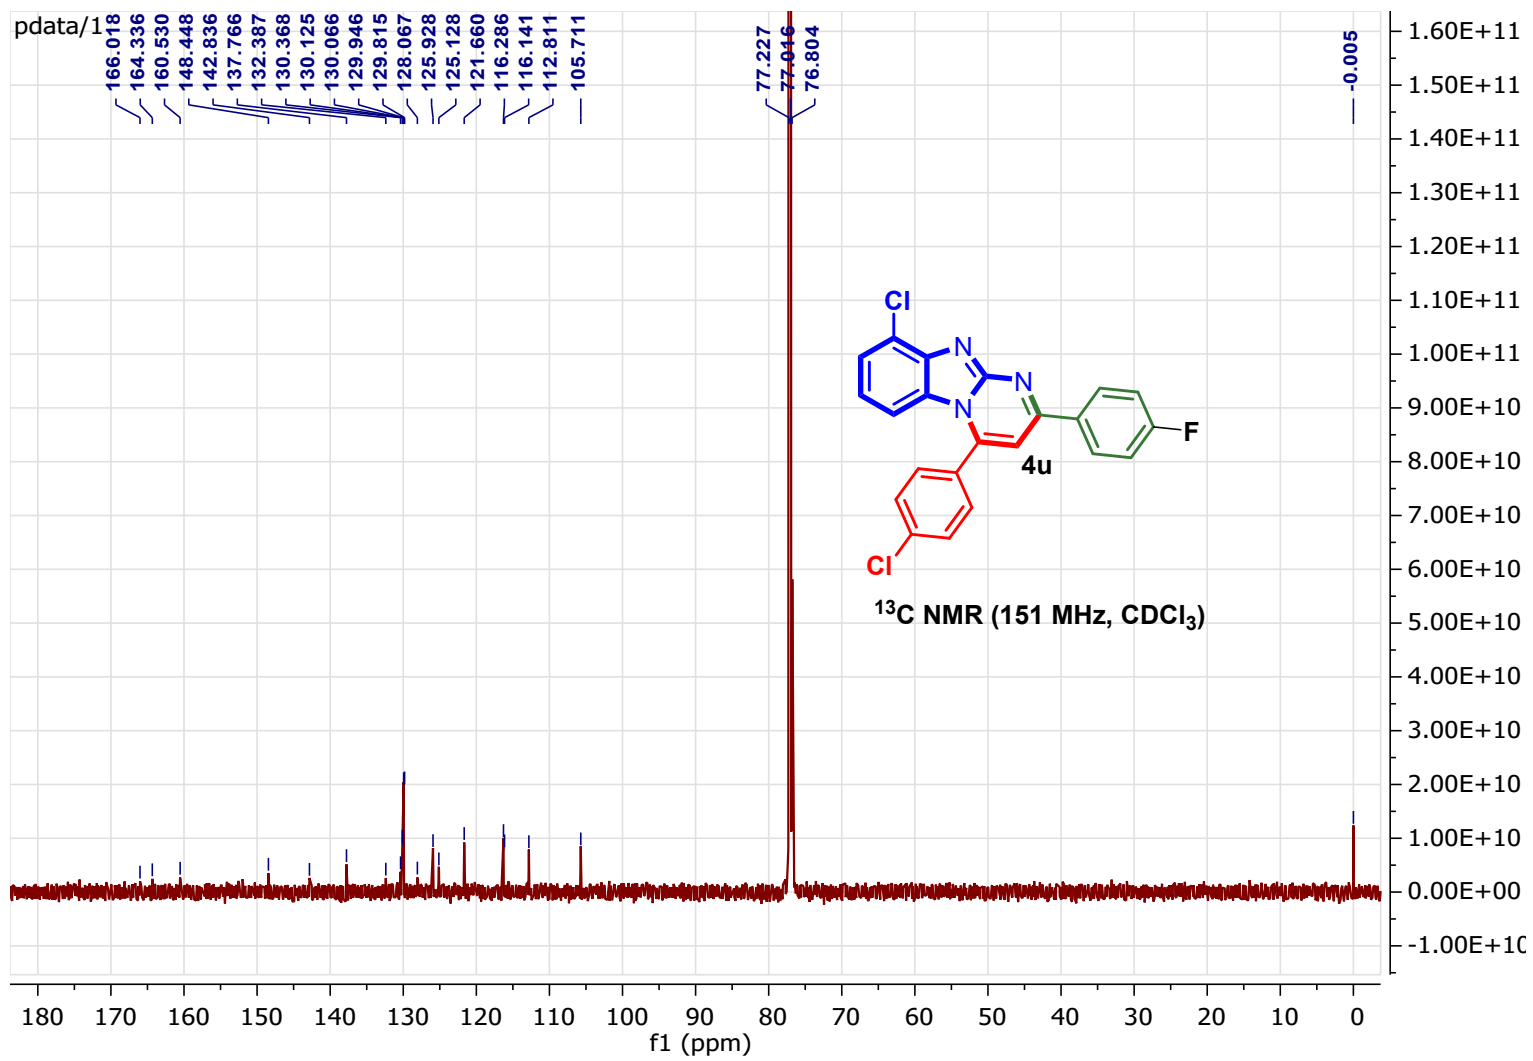

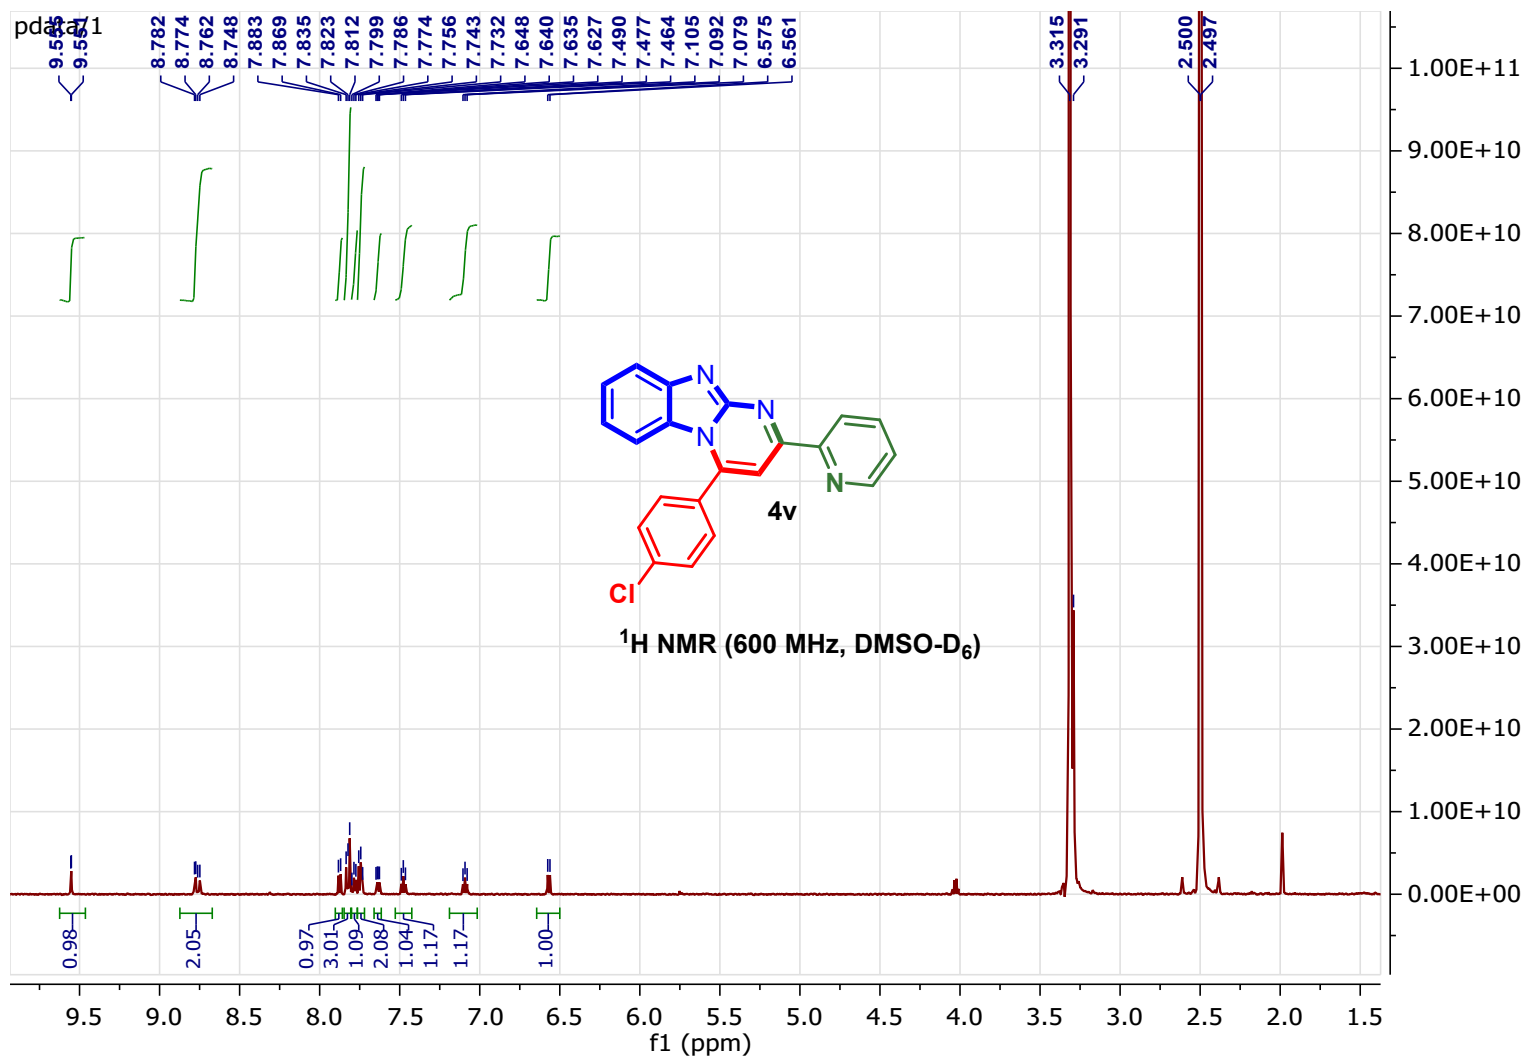

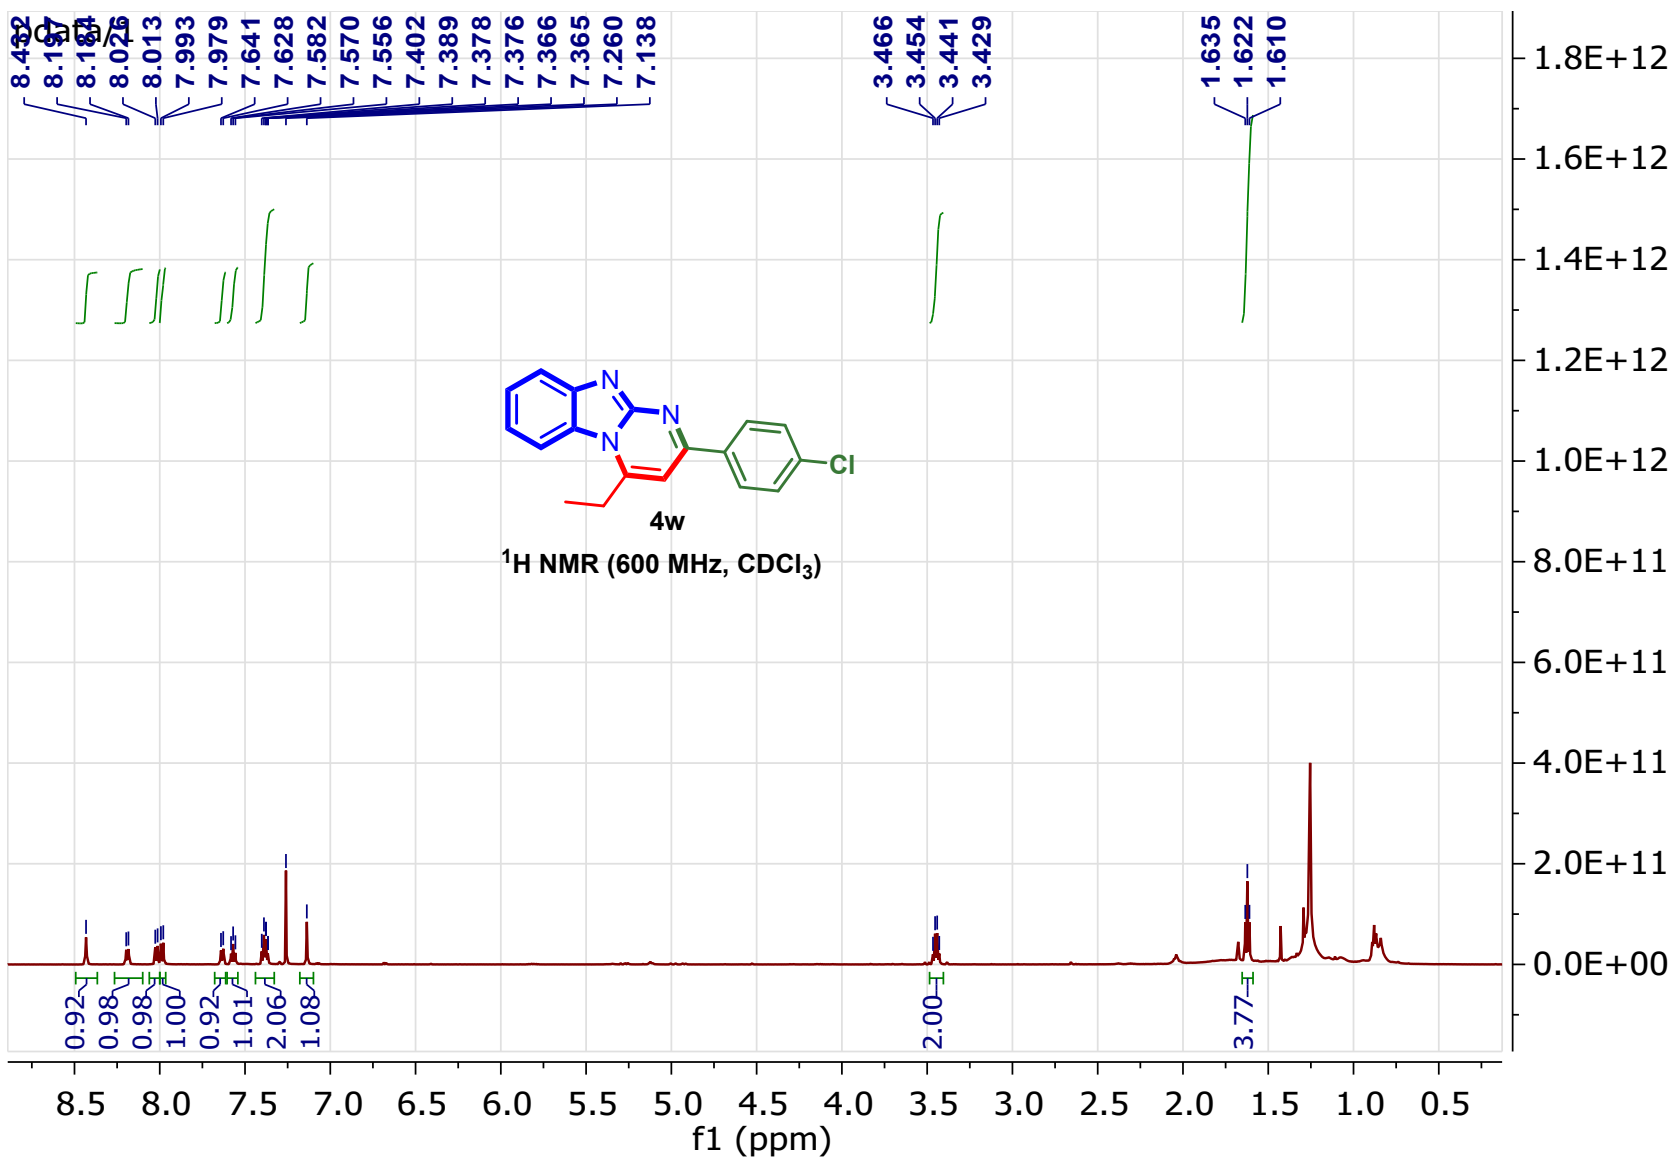

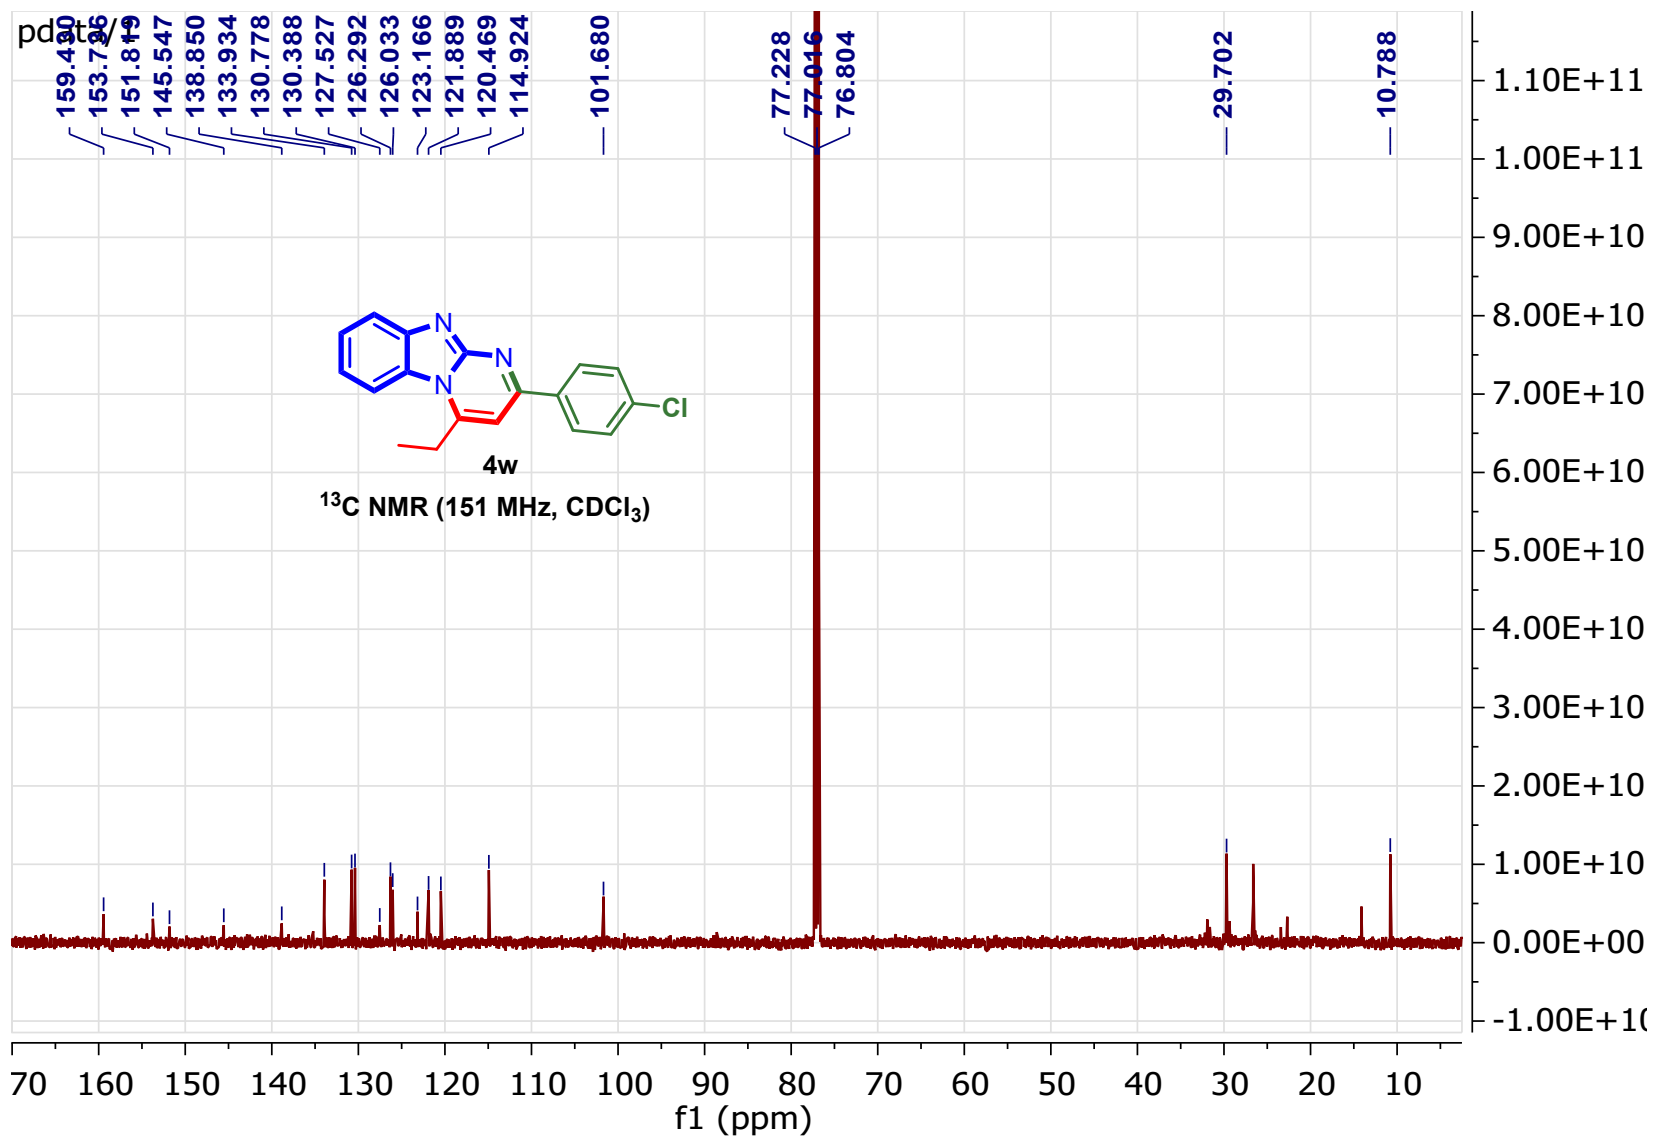

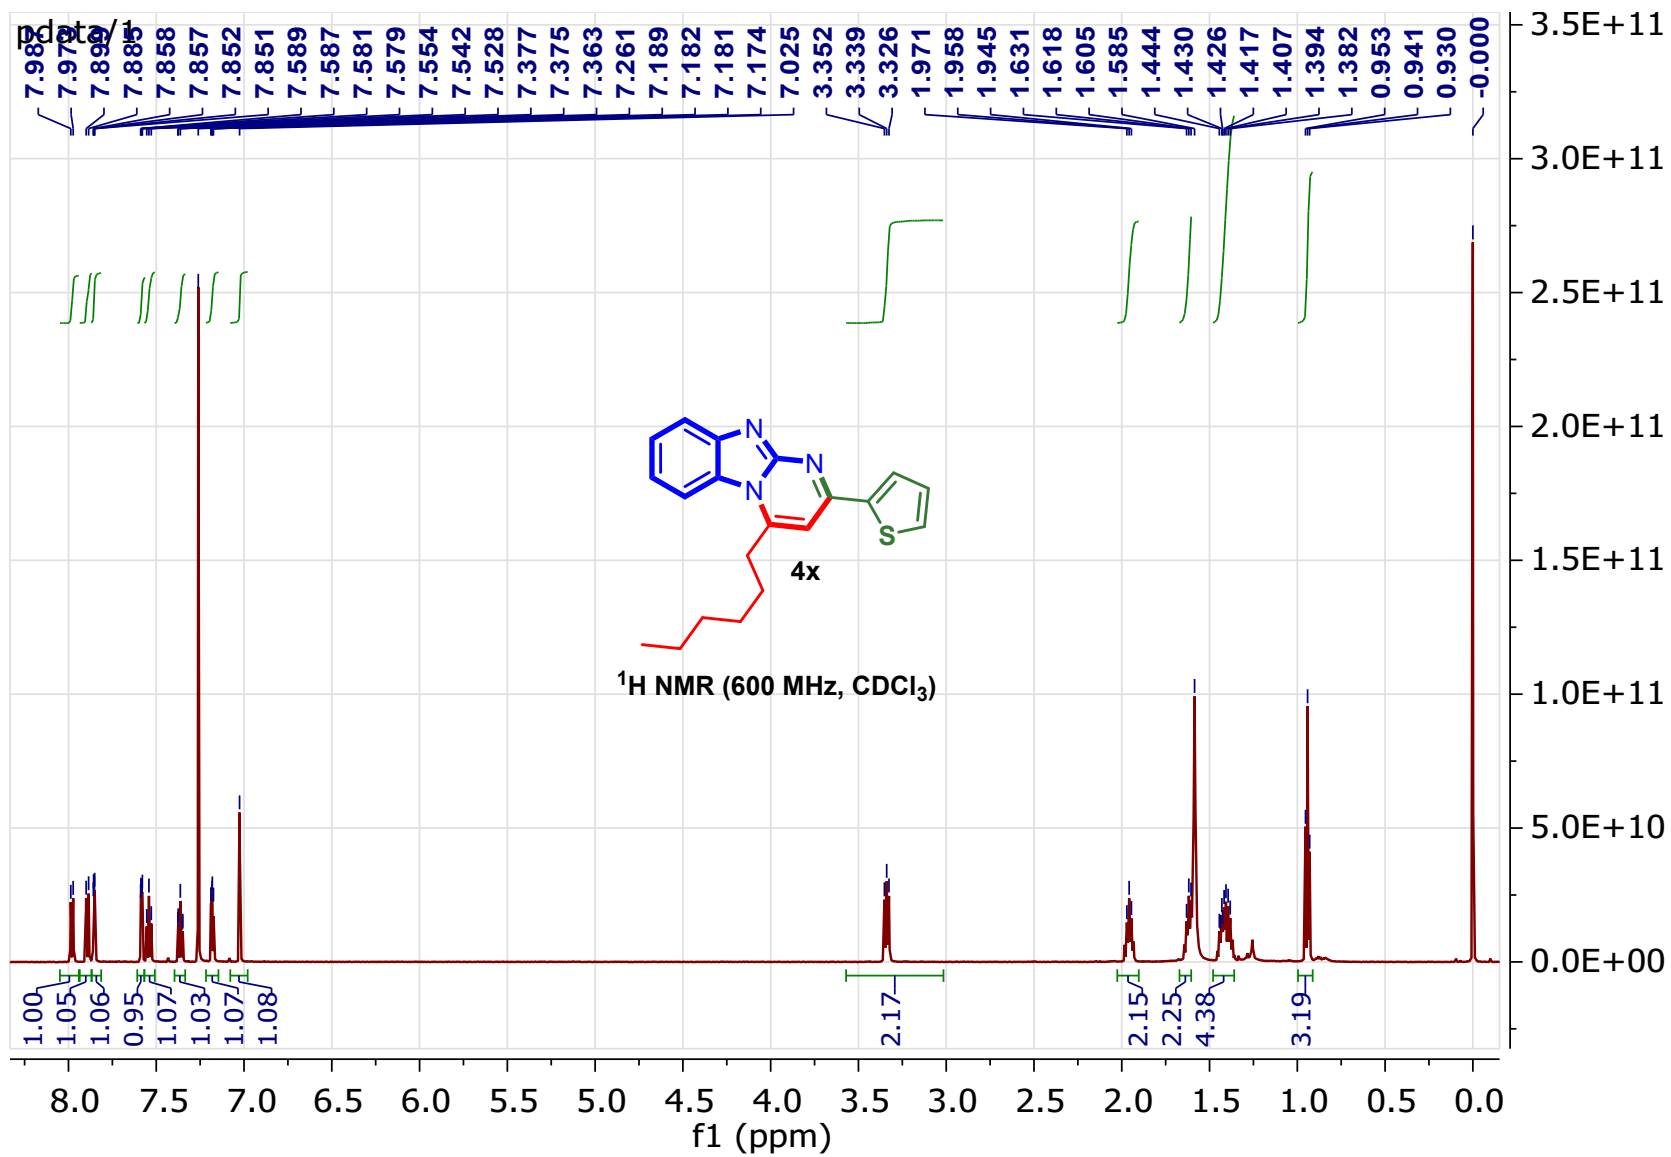



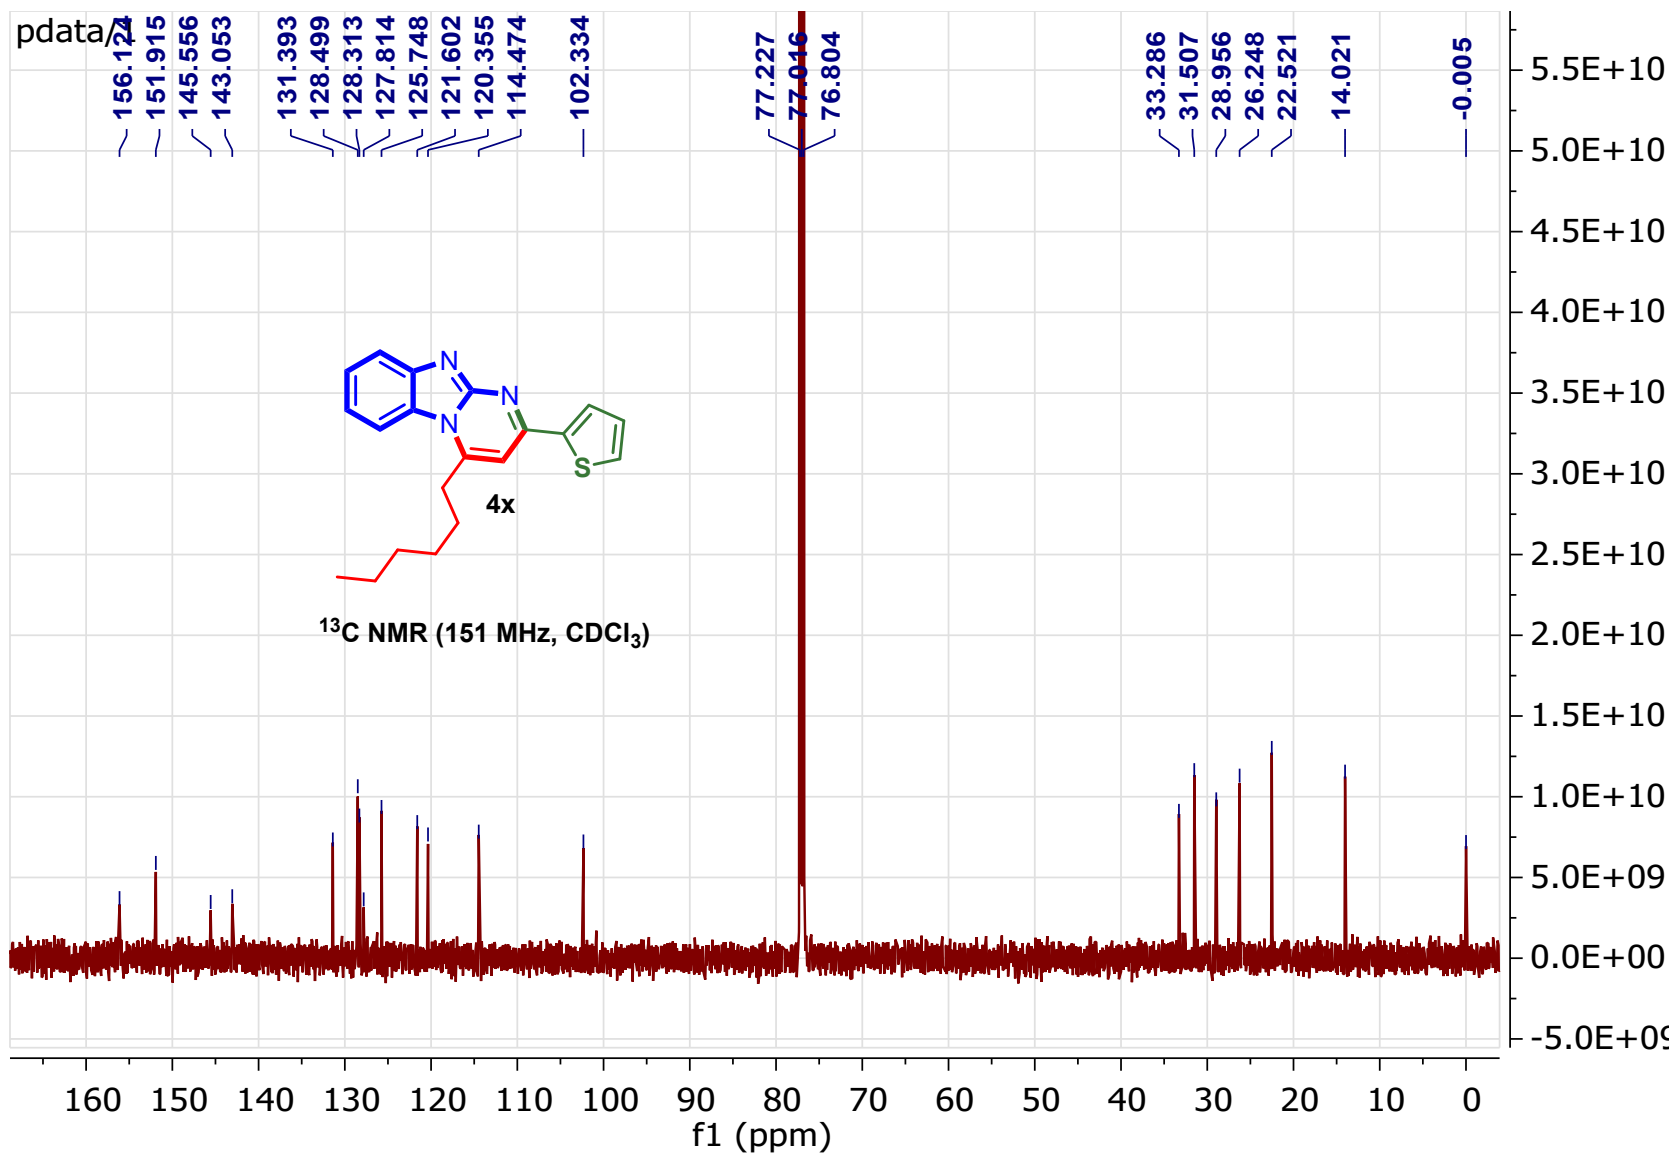

**Figure 1:** a) Fluorescence emission Overlay spectra of 2,4-diaryl pyrimido[1,2-a]benzimidazoles at excitation wavelength of 343 nm;  
b) Comparison of fluorescene intensity of 2,4-diaryl pyrimido[1,2-a]benzimidazoles at excitation wavelength of 343 nm

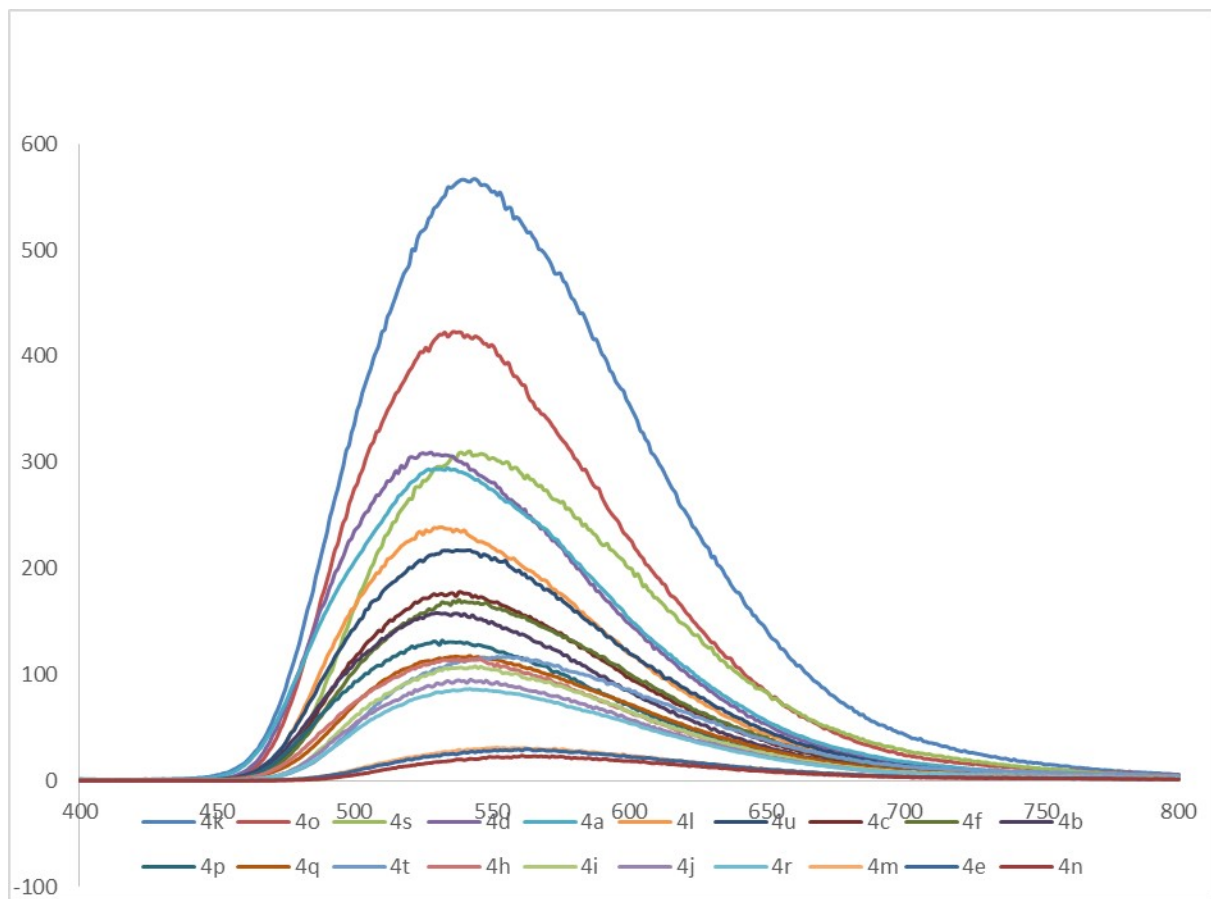

**(a)**

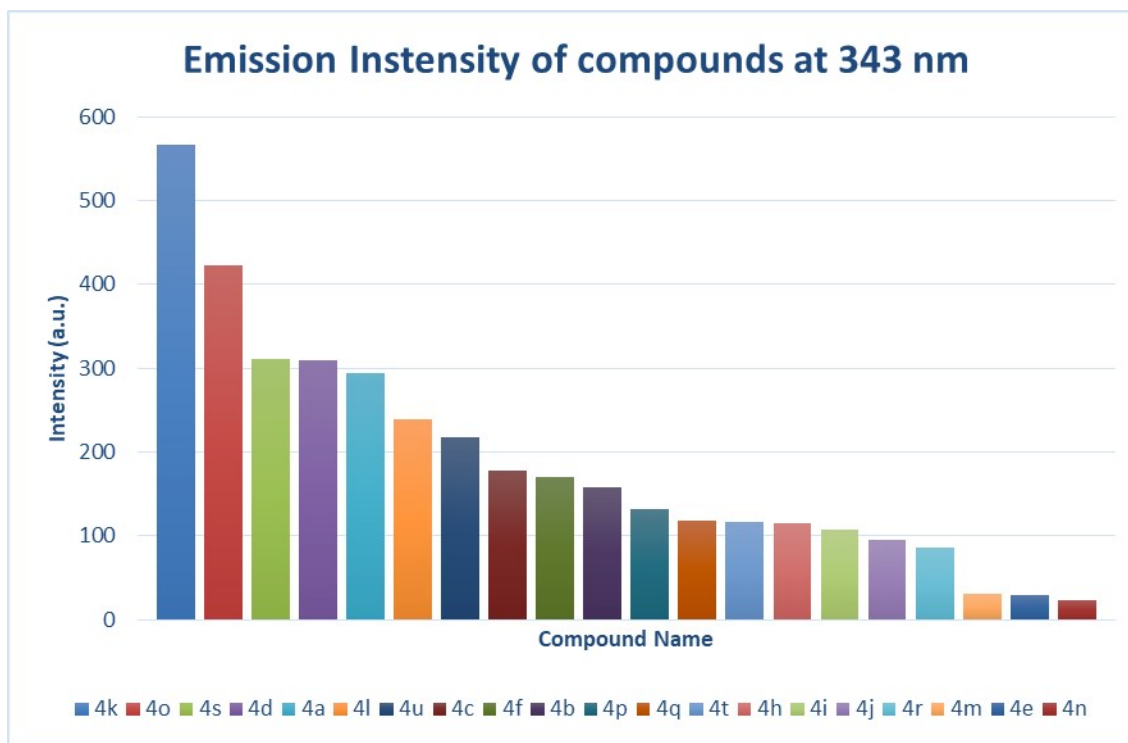

(b)

### Instrumentation Parameter

|                          |                 |
|--------------------------|-----------------|
| Scan Software Version:   | 1.2(147)        |
| Instrument               | Cary Eclipse    |
| Instrument Serial Number | MY2144CG01      |
| Data mode                | Fluorescence    |
| Scan mode                | Emission        |
| X Mode                   | Wavelength (nm) |

|                     |        |
|---------------------|--------|
| Start (nm)          | 400.00 |
| Stop (nm)           | 800.00 |
| Ex. Wavelength (nm) | 343.00 |
| Ex. Slit (nm)       | 10     |
| Em. Slit (nm)       | 20     |
| Scan rate (nm/min)  | 600.00 |
| Data interval (nm)  | 1.0000 |
| Averaging Time (s)  | 0.1000 |
| Excitation filter   | Auto   |
| Emission filter     | Open   |
| PMT voltage (V)     | Medium |

#### Details of Fluorescence Study:

- The emission spectra compounds **4a-v** was recorded at room temperature using chloroform as solvent.
- Concentration 500  $\mu\text{g/ml}$  was used to record the fluorescence spectrum.
- Fluorescence spectrum was recorded in the 10 mm fluorescence cuvette.
- At first, UV-vis absorbance spectrum of the sample was recorded to get the excitation wavelength.
- Excitation wavelength of 343 nm, with an excitation slit width of 10 nm and an emission slit width of 20 nm was employed.
- Emission spectrum by scanning over 400-800 nm wavelength range was recorded to capture the fluorescence emission.
- Baseline spectrum to correct for any background fluorescence or scattering from the solvent was recorded.
- Integrated fluorescence intensity (that is, the area of the fluorescence spectrum) from the fully corrected fluorescence spectrum was calculated.

### **Precautions taken for high temperature reaction in DMSO:**

- Kept away from open flames and sources of ignition.
- DMF is incompatible with a variety of chemicals like strong acid/base, oxidant, and halogenated compounds. Hence, we kept the reaction away from above reagents.
- Avoided contact with skin, eyes or clothing.
- The reaction was monitored in fume-hood.
- The reaction wasn't kept the experiment overnight.
- Used precise temperature control equipment to avoid overheating, which can lead to decomposition of DMSO and fire or explosion.

Additionally, we analyzed the reaction mixture using DSC for calorimetric insights, confirming the safety of using DMSO under basic and thermal conditions.

## Differential Scanning Calorimetry (DSC)

DSC measurements were taken out using a Discovery DSC 2500 from TA Instruments with Trios software. DSC 2500 consists of a finer air-cooling system, auto sampler, and discover liquid nitrogen pump. All data were collected in pierced flat-bottomed aluminum pans of 40  $\mu\text{L}$ . Heating rate was  $10\text{ }^\circ\text{C min}^{-1}$  in the range from 25 to 130  $^\circ\text{C}$ . Sample amount: **1a** (0.01 mmol, 1.20 mg), **2a** (0.01 mmol, 1.06 mg), **3a** (0.01 mmol, 1.33 mg), NaOH (0.01 mmol, 0.04 mg) and DMSO 25  $\mu\text{L}$ .

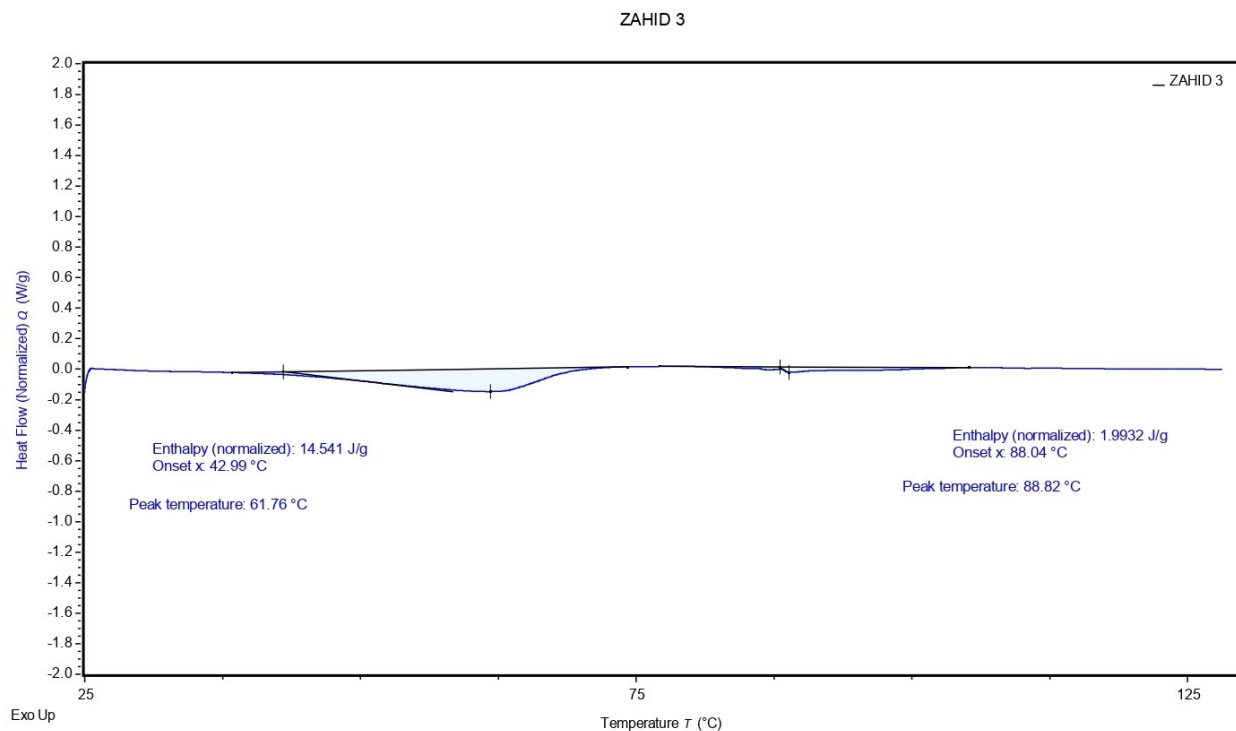

TA Instruments Trios V5.7.1.74
